# Supplementary material for: Harnessing the optimization of enzyme catalytic rates in engineering of metabolic phenotypes
Source: Research Square preprint supplement (doi:10.21203/rs.3.rs-3915216/v1), 2024-02-05
Supplement: Supplementary file 1 [file ff5a683c7d16ccc835a5842e.xlsx]

## Sheet: Table S1. E. coli
Table S1. The result of applying the OKO method on eciML1515 model for overproducing 41 native metabolites of S. cerevisiae. Columns A-D present the name, KEGG ID, CHEBI ID and formulae of each metabolite, respectively. The maximum production level of each metabolite at optimal growth rate is shown in column E. Column F presents the production level of the metabolite in the engineeered model, whe…
											OKO			OKO+
Met Name	Met Index in Model	Met KEGG ID	Met CHEBI ID	Met Formulae	Max production in WT (mmol/gDCW/h)	Production level in engineered model (mmol/gDCW/h)	Biomass level in engineered model (1/h)	minimum e	maximum e	average e	Number of increased Kcats	Number of decreased Kcats	Sum of fold changes of Kcats	Number of increased Kcats	Number of decreased Kcats	Sum of fold changes of Kcats	Number of increased abundances	Number of decreased abundances	Number of organisms	max production using kcats from OKO+	max production using kcats from DLKcat	log fold change
glycerol	816	C00116	17754	C3H8O3	1.59218	3.15252	0.506604	0	0.519848	0.00539675	4	7	4.80153	29	0	1070.65	41	110
choline	779	C00114	15354	C5H14NO	0	0
hypoxanthine	993	C00262	17368	C5H4N4O	0.02092	0.0414217	0.506604	0	0.50472	0.00434738	5	2	36.1818	0	0	0	10	0
xanthine	1139	C00385	17712	C5H4N4O2	0.0188178	0.0372593	0.506604	0	0.504544	0.00424057	2	10	4.19179	37	0	1031.19	48	35
glutathione	1603	C00051	16856	C10H17N3O6S	0.0137656	0.0272559	0.511773	0	0.51007	0.00548881	3	9	6.02036	0	0	0	10	0
L-alanine	125	C00041	16977	C3H7NO2	1.14768	2.27241	0.506604	0	0.503433	0.00444203	2	9	12.4223	28	0	1069.63	43	101	25	100.424	100.424	-1.42741e-08
L-arginine	306	C00062	16467	C6H14N4O2	0.0154756	0.0303352	0.511773	0	0.503712	0.0042782	3	8	22.0069	39	0	1257.43	83	13	30	1.55454	1.50883	-0.0129602
L-asparagine	621	C00152	17196	C4H8N2O3	0.203928	0.403777	0.506604	0	0.507812	0.0044457	2	9	3.46074	30	0	1070.78	52	105	26	21.5076	21.5076	-1.44106e-08
L-aspartate	1641	C00049	17053	C4H7NO4	1.82472	3.61295	0.506604	0	0.521663	0.00542613	10	7	40.3698	0	0	0	5	0
L-citrulline	97	C00327	16349	C6H13N3O3	0.0242677	0.04805	0.511773	0	0.500363	0.00339494	2	8	13.0671	0	0	0	7	0
L-cysteine	1003	C00097	17561	C3H7NO2S	0.0192931	0.0382004	0.506604	0	0.504038	0.0043693	0	9	2.47361	27	0	1068.58	46	104	26	1.91899	1.91899	0
L-glutamate	914	C00025	29985	C5H8NO4	0.0811371	0.160652	0.506604	0	0.504093	0.0042447	0	9	2.47361	39	0	1041.98	38	27	34	8.41445	8.41445	-1.44101e-08
L-glutamine	966	C00064	18050	C5H10N2O3	0.0553038	0.109501	0.506604	0	0.500677	0.00338808	2	7	2.47361	0	0	0	28	0
L-glycine	780	C00037	15428	C2H5NO2	0.144908	0.286917	0.506604	0	0.506009	0.0042462	0	9	2.47361	0	0	0	3	0
L-histidine	991	C00135	15971	C6H9N3O2	0.0260938	0.0516657	0.506604	0	0.509826	0.00525962	14	7	42.9133	0	0	0	12	0
L-homoserine	367	C00263	15699	C4H9NO3	0.426833	0.845128	0.506604	0	0.508968	0.00429987	6	7	12.9908	2	0	2.17779	3	0
L-isoleucine	980	C00407	17191	C6H13NO2	0.123359	0.244252	0.511773	0	0.505561	0.00432014	3	9	14.034	0	0	0	15	0
L-leucine	500	C00123	15603	C6H13NO2	0.281519	0.557407	0.506604	0	0.504959	0.00430843	9	10	22.2996	44	0	1278.14	52	26	38	27.0211	27.0211	7.71462e-16
L-lysine	238	C00047	32551	C6H15N2O2	0.245944	0.491888	0.506604	0	0.513762	0.00534146	10	11	25.7627	0	0	0	12	0
L-methionine	540	C00073	16643	C5H11NO2S	0.01561	0.0309078	0.506604	0	0.504694	0.00437754	0	7	2.47361	30	0	1071.35	45	105	25	0.70284	0.697751	-0.00315589
L-phenylalanine	1741	C00079	17295	C9H11NO2	0.462217	0.915189	0.506604	0	0.521715	0.00529348	16	7	25.6152	0	0	0	13	0
L-proline	445	C00148	17203	C5H9NO2	0.0743039	0.148608	0.506604	0	0.504525	0.00426886	4	0	10.1133	29	0	1070.65	47	102	26	8.15817	8.15817	-1.44101e-08
L-serine	1254	C00065	17115	C3H7NO3	0.0776135	0.153675	0.506604	0	0.504587	0.00424646	3	2	19.045	31	0	1082.4	45	239	26	7.53113	7.53113	0
L-threonine	1646	C00188	16857	C4H9NO3	0.144587	0.286282	0.506604	0	0.50256	0.00363602	2	7	2.47361	0	0	0	17	0
L-tryptophan	1813	C00078	16828	C11H12N2O2	0.0572663	0.113387	0.506604	0	0.511719	0.00546367	13	9	9.77925	28	0	1065.73	57	227	24	5.7471	5.7471	-1.45131e-08
L-tyrosine	998	C00082	17895	C9H11NO3	0.460189	0.920378	0.506604	0	0.515999	0.00427336	14	11	51.6066	1	0	0.0839121	19	0	1	38.6227	38.6227	0
L-valine	360	C00183	16414	C5H11NO2	0.636801	1.26087	0.506604	0	0.50291	0.00424411	7	7	22.4905	28	0	1069.63	50	101	25	61.5889	61.5889	-1.43292e-08
ornithine	909	C01602	46912	C5H13N2O2	0.0244987	0.0485074	0.506604	0	0.504163	0.00444235	0	7	0.7	29	0	1070.92	45	104
putrescine	1523	C00134	326268	C4H14N2	0.0207987	0.0411815	0.506604	0	0.503535	0.00432304	3	7	3.69583	0	0	0	14	0
oleate	268	C00712	16196	C18H34O2	0.0112012	0.0201622	0.511773	0	0.501003	0.00347476	1	9	4.04987	0	0	0	16	0
palmitoleate	1783	C08362	32372	C16H29O2	0.0126867	0.0251197	0.506604	0	0.500492	0.00340069	2	10	11.8372	0	0	0	18	0
succinate	1253	C00042	26806	C4H6O4	1.54217	3.05349	0.506604	0	0.513697	0.00431301	9	7	9.49351	1	0	1.84344	13	1
(S)-lactate	1413	C00186	16651	C3H6O3	2.07601	4.11049	0.506604	0	0.141591	0.000593085	8	9	33.2819	0	0	0	17	1
(S)-malate	1738	C00149	15589	C4H6O5	1.89244	3.74704	0.506604	0	0.554814	0.0108078	7	0	46.3211	0	0	0	6	0
2-oxoglutarate	9	C00026	16810	C5H6O5	0.081136	0.146045	0.506604	0	0.504619	0.00442086	1	9	3.4953	0	0	0	10	0
acetate	436	C00033	15366	C2H4O2	8.57146	16.2858	0.506604	0	0.502946	0.00433133	3	7	3.42419	25	0	1051.19	50	112
citrate	498	C00158	16947	C6H8O7	0.858897	1.70062	0.506604	0	0.515008	0.00434421	6	10	23.9581	0	0	0	8	0
fumarate	1745	C00122	18012	C4H4O4	1.84955	3.51415	0.506604	0	0.521197	0.00529775	9	0	49.0186	1	0	0.537908	10	0
glycolate	1109	C00160	17497	C2H4O3	0.0801551	0.16031	0.506604	0	0.504184	0.00443986	3	7	3.72421	30	0	1085.03	46	240
hexanoate	1525	C01585	17120	C6H12O2	0.0859239	0.170129	0.506604	0	0.504758	0.0042572	5	10	31.8266	0	0	0	10	0
pyruvate	335	C00022	15361	C3H3O3	135.596	268.48	0.506604	0	0.523837	0.00453566	30	9	93.8948	2	0	5.91064	12	2

## Sheet: Table S2. S. cerevisiae
Table S2. The result of applying the OKO method on ecYeastGEM_v8.3.4 model for overproducing 49 native metabolites of S. cerevisiae. Columns A-D present the name, KEGG ID, CHEBI ID and formulae of each metabolite, respectively. The maximum production level of each metabolite at optimal growth rate is shown in column E. Column F presents the production level of the metabolite in the engineeered mo…
											OKO			OKO+
Met Name	Met Index in Model	Met KEGG ID	Met CHEBI ID	Met Formulae	Max production in WT (mmol/gDCW/h)	Production level in engineered model (mmol/gDCW/h)	Biomass level in engineered model (1/h)	minimum e	maximum e	average e	Number of increased Kcats	Number of decreased Kcats	Sum of fold changes of Kcats	Number of increased Kcats	Number of decreased Kcats	Sum of fold changes of Kcats	Number of increased abundances	Number of decreased abundances	Number of organisms	max production using kcats from OKO+	max production using kcats from DLKcat	log fold change
(R,R)-2,3- butanediol	35	C03044	16982	C4H10O2	1.23654	2.44834	0.335475	0	0.690174	0.0153951	10	8	30.8465	48	0	1525.75	59	146
2-phenylethanol	130	C05853	49000	C8H10O	0.0538071	0.106538	0.335475	0	0.692884	0.0149394	6	9	5.60698	84	0	4917.01	116	73
glycerol	577	C00116	17754	C3H8O3	1.34667	2.66641	0.335475	0	0.712154	0.0150125	2	9	4.04718	0	0	0	9	0
isoamylol	725	C07328	15837	C5H12O	0.0603647	0.119522	0.335475	0	0.691989	0.0151876	4	9	4.757	1	0	0.369445	4	0
isobutanol	728	C14710	46645	C4H10O	0.202254	0.400463	0.335475	0	0.693488	0.0150364	6	9	13.1443	1	0	9.11281	7	0
choline	389	C00114	15354	C5H14NO	0.00190479	0.00377149	0.335475	0	0.691606	0.0151746	1	6	9.88282	77	0	3955.13	116	54
hypoxanthine	643	C00262	17368	C5H4N4O	0.013778	0.0272805	0.335475	0	0.692892	0.0152827	8	10	15.1078	50	0	2140.37	46	134
xanthine	263	C00385	17712	C5H4N4O2	1.31638	2.60644	0.335522	0	0.690256	0.0153129	2	10	4.44297	5	0	2.44727	4	0
glutathione	567	C00051	16856	C10H17N3O6S	0.0334631	0.066257	0.335475	0	0.69725	0.015137	13	10	11.5032	0	0	0	12	1
L-alanine	749	C00041	16977	C3H7NO2	0.615697	1.21908	0.335475	0	0.699825	0.0151918	4	9	3.87663	47	0	1797.56	45	161	42	64.9036	64.9036	1.14757e-09
L-arginine	759	C00062	16467	C6H14N4O2	0.0361639	0.0716045	0.335475	0	0.696051	0.0151193	9	9	5.96075	2	0	0.537586	10	0	2	3.36639	3.36679	5.13452e-05
L-asparagine	763	C00152	17196	C4H8N2O3	0.0684525	0.135536	0.335475	0	0.695772	0.015123	1	9	2.3437	45	0	1762.32	42	159	42	6.56806	6.56806	6.06189e-10
L-aspartate	767	C00049	17053	C4H7NO4	0.352783	0.698511	0.335475	0	0.701681	0.0151474	2	9	2.32697	50	0	2165.55	45	153	44	38.4255	38.4255	2.49888e-09
L-citrulline	2651	C00327	16349	C6H13N3O3	0.0420866	0.0833314	0.335475	0	0.695356	0.0151681	7	9	5.47245	82	0	3192.76	98	96
L-cysteine	775	C00097	17561	C3H7NO2S	0.0539881	0.106896	0.335475	0	0.695166	0.0152291	10	9	18.2598	66	0	4896.63	124	61	53	4.98777	4.98777	0
L-glutamate	785	C00025	29985	C5H8NO4	0.207257	0.410369	0.335475	0	0.694811	0.0152635	5	9	12.9174	81	0	5052.77	98	89	61	7.17991	7.17957	-2.0379e-05
L-glutamine	792	C00064	18050	C5H10N2O3	0.17554	0.34757	0.335475	0	0.69716	0.015375	5	9	3.96438	1	0	0.428934	8	0	1	7.61934	7.57055	-0.00278984
L-glycine	796	C00037	15428	C2H5NO2	0.22828	0.451995	0.335475	0	0.706269	0.0151933	7	9	6.44334	49	0	1799.81	64	151	42	19.1476	19.1473	-6.53449e-06
L-histidine	799	C00135	15971	C6H9N3O2	0.0174195	0.0344907	0.335475	0	0.692581	0.0151444	9	9	5.16111	2	0	0.786771	7	0	2	1.75792	1.75791	-1.993e-06
L-homoserine	806	C00263	15699	C4H9NO3	0.249145	0.493306	0.335475	0	0.704061	0.0151796	4	9	3.99805	46	0	1762.9	51	158
L-isoleucine	808	C00407	17191	C6H13NO2	0.049516	0.0980416	0.335475	0	0.695522	0.0150309	6	9	3.15384	1	0	0.238411	6	0	1	4.56462	4.56462	-3.13959e-09
L-leucine	813	C00123	15603	C6H13NO2	0.0614272	0.121626	0.335475	0	0.693018	0.0151602	4	9	6.2468	45	0	3099.55	42	146	41	5.65289	5.65289	0
L-lysine	817	C00047	32551	C6H15N2O2	0.0202757	0.0401458	0.335475	0	0.692356	0.015114	0	9	1.62408	0	0	0	2	0
L-methionine	821	C00073	16643	C5H11NO2S	0.0359375	0.0711562	0.335475	0	0.695747	0.0152227	11	9	12.8695	1	0	0.702686	9	0	1	3.57561	3.57561	-1.69001e-07
L-phenylalanine	824	C00079	17295	C9H11NO2	0.0493307	0.0976748	0.335475	0	0.69346	0.0151567	5	9	4.16734	47	0	1762.92	50	157	43	4.51431	4.51431	0
L-proline	827	C00148	17203	C5H9NO2	0.123176	0.243888	0.335475	0	0.698237	0.0151309	6	9	5.04215	45	0	3099.55	45	145	41	11.3806	11.3806	5.90689e-10
L-serine	832	C00065	17115	C3H7NO3	0.136802	0.270869	0.335475	0	0.694639	0.0151509	3	9	2.81094	81	0	3929.64	103	80	57	13.0017	13.0018	1.70593e-07
L-threonine	837	C00188	16857	C4H9NO3	0.202925	0.401791	0.335475	0	0.704806	0.0151867	6	9	4.97877	83	0	1540.24	114	80	63	20.6645	20.6645	1.1137e-09
L-tryptophan	840	C00078	16828	C11H12N2O2	0.00843804	0.0167073	0.335475	0	0.691326	0.0150928	5	9	3.50631	48	0	1778.52	49	146	42	1.04203	1.04201	-8.575e-06
L-tyrosine	843	C00082	17895	C9H11NO3	0.0499408	0.0988827	0.335475	0	0.692809	0.0150867	6	9	13.5246	46	0	1825.03	46	148	42	3.12456	3.12339	-0.000162661
L-valine	848	C00183	16414	C5H11NO2	0.156373	0.309619	0.335475	0	0.694923	0.0151355	4	9	3.54072	82	0	3520.9	96	92	60	15.4834	15.4834	1.15256e-09
ornithine	995	C01602	46912	C5H13N2O2	0.0467594	0.0925835	0.335475	0	0.693274	0.015103	3	9	4.04616	70	0	3490.62	95	79
putrescine	1069	C00134	326268	C4H14N2	0.0408415	0.0808661	0.335475	0	0.693197	0.0150982	4	9	4.94622	0	0	0	8	0
spermine	1117	C00750	45725	C10H30N4	0.00514649	0.01019	0.335475	0	0.692482	0.0151892	11	9	15.0685	1	0	0.999854	5	0
laurate	853	C02679	18262	C12H23O2	0.00791426	0.0156702	0.335475	0	0.694286	0.0152225	7	8	49.4833	49	0	1782.67	57	138
oleate	1322	C00712	16196	C18H34O2	0.00527666	0.0211066	0.135545	0	0.693647	0.0151791	60	278	686.362	0	0	0	8	0
palmitoleate	1015	C08362	32372	C16H29O2	0.00631763	0.0125089	0.335475	0	0.693802	0.0151791	1	6	10.3154	51	0	1779.9	49	147
triacylglycerol	1171	C00422	17855	C6H5O6R3	0.000118329	0.000128013	0.405887	0	0.693792	0.015083	8	3	1.77155	80	0	3631.85	115	79
ergosterol	512	C01694	16933	C28H44O	0.00105976	0.00209833	0.335475	0	0.692014	0.0151599	1	9	1.78839	49	0	1534.87	61	139
succinate	1129	C00042	26806	C4H6O4	0.720522	1.42663	0.335475	0	0.70197	0.0151187	5	9	7.0062	85	0	4058.65	105	89
(S)-lactate	49	C00186	16651	C3H6O3	0.412783	0.817311	0.335522	0	0.699694	0.015417	2	8	3.66448	53	0	1859.72	75	165
(S)-malate	53	C00149	15589	C4H6O5	0.909365	1.80054	0.335475	0	0.705096	0.015122	2	9	2.85713	1	0	0.566733	2	0
2-oxoglutarate	125	C00026	16810	C5H6O5	0.258474	0.511778	0.335475	0	0.691297	0.0153691	6	10	8.0293	48	0	1793.94	60	139
acetate	268	C00033	15366	C2H4O2	1.56037	3.08953	0.335475	0	0.665945	0.0154468	8	10	36.1396	0	0	0	6	0
citrate	395	C00158	16947	C6H8O7	0.235491	0.466271	0.335475	0	0.69528	0.015292	3	9	2.88741	81	0	3500.92	92	91
fumarate	551	C00122	18012	C4H4O4	0.902684	1.78731	0.335475	0	0.704948	0.0151708	3	9	11.855	73	0	3172.72	120	72
glycolate	2482	C00160	17497	C2H4O3	0.187284	0.370822	0.335539	0	0.691523	0.0154007	7	8	6.29714	51	0	3639.34	58	162
hexanoate	1321	C01585	17120	C6H12O2	0.000947198	0.00187545	0.335475	0	0.691068	0.0151291	16	7	87.6027	45	0	1775.75	48	149
pyruvate	1079	C00022	15361	C3H3O3	1.55201	3.07298	0.335475	0	0.690174	0.0148776	9	8	27.627	85	0	3222.79	142	61

## Sheet: Table S3
Table S3. Proposed engineering strategies for overproduction of compounds with the least number of modifications required.
Enzyme	Reaction	Log fold change
S. cerevisiae
Choline
Biotin--protein ligase	acetyl-CoA carboxylase, reaction	-0.00100355
Acetyl-CoA carboxylase	acetyl-CoA carboxylase, reaction	-7.2897
ATPase GET3	dihydroneopterin monophosphate dephosphorylase	-0.693147
Cytochrome c oxidase assembly protein	heme O monooxygenase	-0.200671
Uroporphyrinogen-III synthase	uroporphyrinogen-III synthase	-0.105361
Phospholipase D1	PC phospholipase D (1-18:0, 2-18:1), cell envelope	2.30259
Iron transport multicopper oxidase FET3	iron (II) transport	-0.105361
Palmitoleate
ATPase GET3	dihydroneopterin monophosphate dephosphorylase	-0.693147
Cytochrome c oxidase assembly protein	heme O monooxygenase	-0.367725
Protoheme IX farnesyltransferase, mitochondrial	Heme O synthase	-0.367725
Uroporphyrinogen decarboxylase	uroporphyrinogen decarboxylase (uroporphyrinogen III)	-1.0772
Uroporphyrinogen-III synthase	uroporphyrinogen-III synthase	-0.105361
Peroxisomal acyl-coenzyme A thioester hydrolase 1	peroxisomal acyl-CoA thioesterase (16:1)	2.30259
Iron transport multicopper oxidase FET3	iron (II) transport	-0.105361
E. coli
Proline
Gamma-glutamyl phosphate reductase	Glutamate-5-semialdehyde dehydrogenase	0.380115
Dye-decolorizing peroxidase YfeX	Ferrochelatase	2.30259
Pyrroline-5-carboxylate reductase	Pyrroline-5-carboxylate reductase	0.172644
Glutamate 5-kinase	Glutamate 5-kinase	0.380115
Serine
Fatty acid oxidation complex subunit alpha	3-hydroxyacyl-CoA dehydratase (3-hydroxyhexanoyl-CoA)	2.30259
Deferrochelatase	Ferrochelatase	-0.641443
Thiamine kinase	Thiamine kinase	-0.752096
Serine hydroxymethyltransferase	Glycine hydroxymethyltransferase, reversible (reversible)	0.0420021
Fatty acid oxidation complex subunit alpha	3-cis-2-trans-enoyl-CoA isomerase (reversible)	2.30259

## Sheet: Table S4.
Table S4. The log fold change of predicted kcat values for enzymes required for the overproduction of at least three amino acids in eciML1515 model.
Uniprot ID	Protein Name	log fold changes
P76536	Dye-decolorizing peroxidase YfeX	-0.435985	-0.435985	-0.435985	-0.435985	-0.435985	2.30259	-0.435985	-0.435985	-0.435985
P31545	Deferrochelatase	-0.438943	-0.435985	-0.435985	-0.435985	-0.438943	-0.435985	-0.435985	-0.435985	-0.435985	-0.641443	-0.435985
P31548	Thiamine import ATP-binding protein ThiQ	-0.435985	-0.438943	-0.435985	-0.435985	-0.435985	-0.435985	-0.435985	-0.435985	-0.435985	-0.438943	-0.435985	-0.435985	-0.435985	-0.435985	-0.435985	-0.435985	-0.435985	-0.435985
P31549	Thiamine transport system permease protein ThiP	-0.435985	-0.438943	-0.435985	-0.435985	-0.435985	-0.435985	-0.435985	-0.435985	-0.435985	-0.438943	-0.435985	-0.435985	-0.435985	-0.435985	-0.435985	-0.435985	-0.435985	-0.435985
P31550	Thiamine-binding periplasmic protein	-0.435985	-0.438943	-0.435985	-0.435985	-0.435985	-0.435985	-0.435985	-0.435985	-0.435985	-0.438943	-0.435985	-0.435985	-0.435985	-0.435985	-0.435985	-0.435985	-0.435985	-0.435985
P21177	Fatty acid oxidation complex subunit alpha [Includes: Enoyl-CoA hydratase/Delta(3)-cis-Delta(2)-trans-enoyl-CoA isomerase/3-hydroxybutyryl-CoA epimerase	2.11842	2.30259	2.30259
P21599	Pyruvate kinase II	2.30259	0.92422	2.30259	0.754973	-2.30259
P39451	Alcohol dehydrogenase, propanol-preferring	-2.30259	-2.30259	-2.30259
P27302	Transketolase 1 (TK 1)	2.30259	0.44435	2.18008	2.30259
P15770	Shikimate dehydrogenase (NADP(+)) (SD) (SDH)	0.60556	0.227619	0.613224
P0A6D3	3-phosphoshikimate 1-carboxyvinyltransferase	0.60556	0.227619	0.613224
P12008	Chorismate synthase (CS)	0.60556	0.227619	0.613224
P05194	3-dehydroquinate dehydratase (3-dehydroquinase)	0.60556	0.227619	0.613224
P09126	Uroporphyrinogen-III synthase (UROS)	-0.435985	-0.438943	-0.435985	-0.435985	-0.435985	-0.435985	-0.435985	-0.435985	-0.435985	-0.438943	-0.435985	-0.435985	-0.435985	-0.435985	-0.435985	-0.435985	-0.435985	-0.435985
P32131	Oxygen-independent coproporphyrinogen III oxidase (CPO)	-0.435985	-0.438943	-0.435985	-0.435985	-0.435985	-0.435985	-0.435985	-0.435985	-0.435985	-0.438943	-0.435985	-0.435985	-0.435985	-0.435985	-0.435985	-0.435985	-0.435985	-0.435985
P0AAB4	3-octaprenyl-4-hydroxybenzoate carboxy-lyase	-0.435985	-0.438943	-0.435985	-0.435985	-0.435985	-0.435985	-0.435985	-0.435985	-0.435985	-0.438943	-0.435985	-0.435985	-0.435985	-0.435985	-0.435985	-0.435985	-0.435985	-0.435985
P05791	Dihydroxy-acid dehydratase (DAD)	2.30259	0.191232	0.522593

## Sheet: Table S5.
Table S5. The log fold change of predicted kcat values for enzymes required for the overproduction of at least three amino acids in ecYeastGEM_v8.3.4 model.
Uniprot ID	Protein Name	log fold changes
P23542	Aspartate aminotransferase, cytoplasmic	0.373976	0.310658	0.269774
P48445	Biotin--protein ligase	-0.00100355	-0.00100355	-0.00100355	-0.00100355	-0.00100355	-0.000995017	-0.00100355	-0.000993531	-0.00100355	-0.00100355	-0.00100355	-0.00100355	-0.00100355	-0.00100355	-0.00100355	-0.00100355	-0.00100355	-0.00100355	-0.00100355	-0.00100355
P00890	Citrate synthase, mitochondrial	0.314158	0.2835	0.223137
P19414	Aconitate hydratase, mitochondrial (Aconitase)	0.774774	0.680652	0.510808
P41939	Isocitrate dehydrogenase [NADP] cytoplasmic (IDH)	2.30259	0.2835	0.223137
P10869	Aspartokinase	0.496907	0.213829	0.475615
P13663	Aspartate-semialdehyde dehydrogenase (ASA dehydrogenase) (ASADH)	0.496907	0.213829	0.475615
P31116	Homoserine dehydrogenase (HDH)	0.496907	0.213829	0.475615
P17423	Homoserine kinase (HK) (HSK)	0.496907	0.0131589	0.475616
Q12154	ATPase GET3	-0.693147	-0.693147	-0.693147	-0.693147	-0.693147	-0.693147	-0.693147	-0.693147	-0.693147	-0.693147	-0.693147	-0.693147	-0.693147	-0.693147	-0.693147	-0.693147	-0.693147	-0.693147	-0.693147	-0.693147
P40988	Low-affinity Fe(2+) transport protein (Low-affinity Fe(II) transport protein)	-0.105361	-0.105361	-0.105361	-0.105361	-0.105361	-0.105361	-0.105361	-0.105361	-0.105361	-0.105361	-0.105361	-0.105361	-0.105361	-0.105361	-0.105361	-0.105361	-0.105361	-0.105361	-0.105361
P40086	Cytochrome c oxidase assembly protein COX15 (Heme a synthase COX15)	-0.367725	-0.367725	-0.367725	-0.367725	-0.367725	-0.367725	-0.367725	-0.367725	-0.367725	-0.367725	-0.367725	-0.367725	-0.367725	-0.367725	-0.367725	-0.367725	-0.367725	-0.367725	-0.367725	-0.367725
P21592	Protoheme IX farnesyltransferase, mitochondrial	-0.367725	-0.367725	-0.367725	-0.367725	-0.367725	-0.367725	-0.367725	-0.367725	-0.367725	-0.367725	-0.367725	-0.367725	-0.367725	-0.367725	-0.367725	-0.367725	-0.367725	-0.367725	-0.367725	-0.367725
P40012	Protoporphyrinogen oxidase (PPO)	-0.367725	-0.367725	-0.367725	-0.367725	-0.367725	-0.367725	-0.367725	-0.367725	-0.367725	-0.367725	-0.367725	-0.367725	-0.367725	-0.367725	-0.367725	-0.367725	-0.367725	-0.367725	-0.367725	-0.367725
P06174	Uroporphyrinogen-III synthase (UROIIIS) (UROS)	-0.105361	-0.105361	-0.105361	-0.105361	-0.105361	-0.105361	-0.105361	-0.105361	-0.105361	-0.105361	-0.105361	-0.105361	-0.105361	-0.105361	-0.105361	-0.105361	-0.105361	-0.105361	-0.105361	-0.105361

## Sheet: Table S6.
Table S6. The number of genes and proteins with predicted kcat values in each species.
Species	geneCount	proteinCount	ecCount
yHMPu5000034950_Citeromyces_hawaiiensis	762	626	537
yHMPu5000041678_Debaryomyces_prosopidis	758	606	515
yHMPu5000035707_Candida_heveicola	675	613	527
yHMPu5000035286_Candida_azyma	720	644	550
yHMPu5000034709_Kluyveromyces_aestuarii	677	628	531
Metschnikowia_matae_maris	692	625	532
yHMPu5000035674_Kregervanrija_delftensis	676	602	514
yHMPu5000041822_Dipodascus_geniculatus	768	626	539
Hanseniaspora_uvarum	558	522	455
Metschnikowia_proteae	648	598	516
Torulaspora_delbrueckii	682	621	527
yHMPu5000034875_Tetrapisispora_fleetii	727	635	531
yHMPu5000035629_Yueomyces_sinensis	681	571	485
Yarrowia_keelungensis	701	621	534
Candida_intermedia	716	635	543
yHMPu5000035022_Candida_emberorum	701	625	535
yHMPu5000035044_Barnettozyma_californica	718	633	539
yHMPu5000035667_Kurtzmaniella_cleridarum	696	635	541
Candida_tenuis	642	575	497
yHMPu5000034665_Kodamaea_laetipori	706	615	523
yHMPu5000034610_Saturnispora_hagleri	646	594	508
yHMPu5000034903_Ogataea_naganishii	704	623	534
yHMPu5000034899_Ogataea_kodamae	607	551	481
yHMPu5000034597_Candida_stellimalicola	669	613	522
yHMPu5000026124_Ogataea_henricii	677	604	516
yHMPu5000034654_Aciculoconidium_aculeatum	777	621	533
yHAB160_Kazachstania_kunashirensis	749	621	524
yHMPu5000034673_Blastobotrys_nivea	789	627	541
yHMPu5000026137_Ambrosiozyma_ambrosiae	703	624	527
yHMPu5000035675_Kregervanrija_fluxuum	689	606	515
yHMPu5000034681_Blastobotrys_americana	695	629	540
yHMPu5000034605_Spencermartinsiella_europaea	707	627	538
yHMPu5000034757_Lipomyces_doorenjongii	640	595	512
Metschnikowia_shivogae	653	602	516
Ascoidea_asiatica	735	605	522
yHMPu5000034887_Ogataea_trehaloabstinens	696	608	521
Stagonospora_nodorum	702	621	540
Millerozyma_acaciae	640	579	500
yHMPu5000035045_Barnettozyma_hawaiiensis	687	626	534
yHMPu5000034890_Ogataea_ramenticola	708	622	530
Xylona_heveae	691	624	538
Lachancea_lanzarotensis	698	642	545
yHMPu5000034674_Blastobotrys_muscicola	700	622	531
yHMPu5000035033_Candida_cretensis	683	600	514
Ascoidea_rubescens	708	601	520
Metschnikowia_dekortum	666	601	520
yHMPu5000034625_Pichia_kudriavzevii	668	586	501
Eremothecium_sinecaudum	587	559	476
yHMPu5000034892_Ogataea_pilisensis	709	628	534
Sporopachydermia_quercuum	714	636	544
Wickerhamomyces_anomalus	752	647	553
yHMPu5000035031_Candida_kruisii	752	597	514
yHMPu5000034629_Pichia_exigua	631	576	498
Nakaseomyces_bacillisporus	697	622	530
yHMPu5000034946_Ambrosiozyma_oregonensis	725	626	528
yHAB136_Kazachstania_bromeliacearum	707	596	514
Lachancea_thermotolerans	696	635	537
Tortispora_caseinolytica	590	559	483
Candida_versatilis	674	596	524
yHMPu5000035302_Candida_fragi	684	616	527
yHMPu5000034669_Blastobotrys_raffinofermentans	736	632	546
yHAB148_Kazachstania_intestinalis	709	624	530
yHMPu5000035274_Wickerhamomyces_alni	721	642	544
Kluyveromyces_marxianus	713	642	544
Ogataea_methanolica	720	619	527
Tetrapisispora_phaffii	738	638	533
yHMPu5000034742_Lipomyces_suomiensis	682	616	527
yHMPu5000034623_Pichia_norvegensis	630	563	485
yHMPu5000034973_Danielozyma_ontarioensis	686	601	518
Pichia_membranifaciens	662	592	505
yHMPu5000035018_Candida_canberraensis	705	628	536
yHMPu5000035037_Candida_montana	683	615	528
Saccharomyces_arboricola	776	653	547
Saccharomyces_eubayanus	767	644	540
Candida_sorboxylosa	617	560	483
Lachancea_fantastica	703	645	547
Metschnikowia_hamakuensis	673	615	528
Spathaspora_arborariae	701	616	529
yHMPu5000041863_Candida_gorgasii	685	599	518
yHMPu5000035301_Pichia_terricola	671	603	515
yHMPu5000034607_Saccharomycopsis_capsularis	747	633	541
Nakaseomyces_bracarensis	730	632	533
Candida_auris	656	602	516
Candida_boidinii_JCM9604	706	631	537
yHMPu5000035662_Meyerozyma_caribbica	650	576	494
yHAB154_Kazachstania_transvaalensis	664	578	496
Ogataea_parapolymorpha	613	556	484
yHMPu5000035041_Ambrosiozyma_pseudovanderkliftii	705	629	533
yHMPu5000034660_Diddensiella_caesifluorescens	703	624	536
Candida_carpophila	647	576	498
Nakaseomyces_delphensis	704	615	522
yHMPu5000035271_Wickerhamomyces_bovis	709	645	549
yHAB166_Kazachstania_yakushimaensis	726	595	510
yHMPu5000034904_Ogataea_nonfermentans	756	590	503
Brettanomyces_anomalus	680	622	532
yHMPu5000034933_Kuraishia_molischiana	704	623	533
yHMPu5000035242_Zygoascus_ofunaensis	686	627	537
yHMPu5000041693_Debaryomyces_nepalensis	689	609	524
Saccharomyces_uvarum	776	649	541
Lachancea_waltii	706	627	535
Metschnikowia_drakensbergensis	655	604	521
yHMPu5000035688_Cyberlindnera_xylosilytica	758	639	544
yHMPu5000034886_Ogataea_trehalophila	696	623	531
Metschnikowia_arizonensis	655	604	520
Ambrosiozyma_monospora	788	622	529
yHMPu5000035244_Candida_incommunis	692	623	535
Lachancea_dasiensis	694	633	538
Candida_sojae	615	527	455
yHMPu5000035641_Yamadazyma_scolyti	662	582	502
yHMPu5000035681_Candida_gotoi	729	631	540
yHMPu5000035650_Trigonopsis_variabilis	662	615	527
Metschnikowia_kamakouana	670	613	523
Tetrapisispora_blattae	715	604	508
yHMPu5000041713_Debaryomyces_maramus	704	618	529
yHMPu5000041824_Debaryomyces_subglobosus	680	603	523
yHMPu5000035696_Hanseniaspora_singularis	572	535	467
yHMPu5000035640_Yamadazyma_philogaea	638	580	498
yHMPu5000034947_Ambrosiozyma_philentoma	745	624	529
yHMPu5000034901_Ogataea_methylivora	760	622	530
yHMPu5000026142_Citeromyces_matritensis	809	628	538
yHMPu5000034594_Starmera_quercuum	728	643	549
yHAB159_Kazachstania_solicola	722	605	515
Lachancea_quebecensis	674	621	531
Metschnikowia_aberdeeniae	636	586	506
Saccharomyces_kudriavzevii	744	630	532
yHMPu5000034655_Botryozyma_nematodophila	726	607	518
yHMPu5000041743_Candida_hawaiiana	661	610	527
yHMPu5000035671_Phaffomyces_antillensis	700	637	542
yHMPu5000035690_Candida_vartiovaarae	714	651	553
yHMPu5000035670_Phaffomyces_opuntiae	694	623	531
Alloascoidea_hylecoeti	920	637	543
yHMPu5000041818_Magnusiomyces_tetrasperma	895	626	537
Metschnikowia_mauinuiana	672	613	524
Kazachstania_naganishii	723	626	533
Metschnikowia_ipomoeae	679	617	526
yHMPu5000026152_Torulaspora_franciscae	745	602	513
Yarrowia_deformans	702	622	535
yHMPu5000041862_Candida_golubevii	679	616	530
Candida_infanticola	620	580	510
Coccidioides_immitis	685	616	535
yHMPu5000034986_Candida_oregonensis	692	622	529
Spathaspora_gorwiae	734	604	518
Candida_homilentoma	713	623	532
Hanseniaspora_vinae	626	576	494
yHMPu5000034615_Saturnispora_zaruensis	645	597	509
yHMPu5000034632_Candida_athensensis	627	571	491
Starmerella_bombicola_JCM9596	606	567	497
yHMPu5000035691_Candida_salmanticensis	696	630	543
yHMPu5000034631_Martiniozyma_abiesophila	763	596	510
Kluyveromyces_lactis	689	636	535
Metschnikowia_kipukae	655	606	524
yHMPu5000035040_Ambrosiozyma_maleeae	683	619	523
Saitoella_complicata	658	606	528
yHMPu5000035695_Hanseniaspora_pseudoguilliermondii	558	528	463
yHMPu5000035703_Cyberlindnera_americana	715	638	543
Babjeviella_inositovora	737	639	546
yHAB158_Kazachstania_viticola	730	595	511
Saccharomycopsis_malanga	712	629	537
yHMPu5000035689_Candida_mycetangii	715	635	539
yHMPu5000035633_Candida_hispaniensis	668	619	532
yHMPu5000034897_Ogataea_glucozyma	736	618	524
Ambrosiozyma_kashinagacola	700	627	534
yHMPu5000026274_Komagataella_populi	656	606	520
Wickerhamiella_domercqiae	601	551	488
Scheffersomyces_lignosus	754	637	546
yHMPu5000035047_Barnettozyma_pratensis	709	637	540
Cyberlindnera_jadinii	739	641	550
yHMPu5000035679_Candida_rhagii	729	631	536
yHMPu5000034612_Saturnispora_saitoi	636	584	497
Debaryomyces_hansenii	696	610	522
yHMPu5000034862_Zygotorulaspora_florentina	720	642	543
Candida_apicola	616	575	503
Metschnikowia_borealis	677	617	528
Saccharomyces_mikatae	742	622	528
Lachancea_kluyveri	735	661	558
Saccharomyces_cerevisiae	848	706	582
Sugiyamaella_lignohabitans	708	636	545
yHMPu5000035652_Torulaspora_maleeae	649	598	510
Candida_arabinofermentans	700	624	533
yHMPu5000034979_Cyberlindnera_misumaiensis	701	628	534
Arxula_adeninivorans	700	627	540
Geotrichum_candidum	813	629	544
Priceomyces_haplophilus	650	589	504
Neurospora_crassa	803	622	536
Fusarium_graminearum	760	635	548
Candida_orthopsilosis	688	607	518
Wickerhamia_fluorescens	684	607	517
yHMPu5000034622_Pichia_occidentalis	679	610	521
yHMPu5000041855_Candida_ascalaphidarum	678	609	523
Candida_tanzawaensis	700	621	532
Metschnikowia_lockheadii	682	623	531
Metschnikowia_continentalis	679	619	532
Metschnikowia_bicuspidata	663	602	520
yHMPu5000041833_Candida_tammaniensis	713	611	526
yHMPu5000034670_Blastobotrys_proliferans	714	629	538
yHMPu5000034893_Ogataea_philodendra	622	562	486
yHMPu5000035687_Cyberlindnera_suaveolens	717	642	546
yHMPu5000034667_Blastobotrys_serpentis	718	628	541
yHMPu5000035699_Cyberlindnera_maclurae	686	626	535
Kuraishia_capsulata	712	631	537
yHMPu5000035048_Barnettozyma_salicaria	709	623	526
yHMPu5000034891_Ogataea_pini	679	610	519
yHMPu5000034988_Candida_fructus	684	623	534
yHMPu5000035243_Zygoascus_meyerae	688	627	539
yHMPu5000034877_Tetrapisispora_namnaonensis	736	640	534
yHMPu5000035268_Wickerhamomyces_hampshirensis	730	645	546
Nadsonia_fulvescens_var_elongata	714	621	536
yHMPu5000034611_Saturnispora_mendoncae	623	574	493
yHMPu5000034643_Candida_schatavii	711	611	523
yHMPu5000034939_Komagataella_pseudopastoris	642	594	512
yHMPu5000034624_Pichia_nakasei	592	544	472
Metschnikowia_matae	681	616	527
Metschnikowia_cerradonensis	676	620	529
yHMPu5000035297_Priceomyces_castillae	665	600	515
yHMPu5000026197_Brettanomyces_custersianus	643	590	509
yHMPu5000035645_Yarrowia_divulgata	711	623	536
yHMPu5000035686_Cyberlindnera_saturnus	755	639	546
Pachysolen_tannophilus	712	634	539
yHAB133_Kazachstania_unispora	751	637	540
yHMPu5000035673_Candida_orba	693	625	528
Eremothecium_coryli	614	583	497
yHMPu5000035046_Barnettozyma_populi	698	627	534
yHMPu5000034967_Candida_freyschussii	707	635	539
Sclerotinia_sclerotiorum	691	619	535
Meyerozyma_guilliermondii	660	580	500
yHMPu5000035282_Trigonopsis_vinaria	656	617	531
yHMPu5000034749_Lipomyces_mesembrius	680	624	537
Metschnikowia_hibisci	660	608	520
yHMPu5000034671_Blastobotrys_peoriensis	711	632	545
yHMPu5000034635_Nadsonia_fulvescens	715	624	538
Nakaseomyces_castellii	677	607	521
yHMPu5000034902_Ogataea_minuta	607	545	473
yHMPu5000034865_Zygosaccharomyces_kombuchaensis	654	599	516
yHMPu5000034646_Wickerhamiella_cacticola	672	578	504
yHMPu5000034760_Lipomyces_kononenkoae	699	623	537
Schizosaccharomyces_pombe	620	553	480
yHMPu5000034604_Sporopachydermia_lactativora	704	634	542
Aspergillus_nidulans	739	625	543
Wickerhamomyces_ciferrii	751	655	557
Candida_tropicalis	745	619	531
yHMPu5000035032_Candida_gatunensis	651	585	501
yHMPu5000034952_Citeromyces_siamensis	1181	628	538
yHMPu5000035318_Hyphopichia_heimii	725	621	529
yHMPu5000035658_Starmera_amethionina	658	598	512
yHMPu5000035677_Kodamaea_ohmeri	695	621	530
Arthrobotrys_oligospora	691	625	536
Candida_parapsilosis	702	602	517
yHMPu5000041829_Debaryomyces_fabryi	682	603	519
Zygosaccharomyces_bailii	664	610	520
Spathaspora_hagerdaliae	730	609	521
yHMPu5000035325_Cyberlindnera_petersonii	716	638	543
yHMPu5000034648_Candida_restingae	694	619	525
yHAB132_Kazachstania_martiniae	746	627	536
Candida_succiphila	676	613	524
yHMPu5000034758_Lipomyces_japonicus	661	607	520
Metschnikowia_bowlesiae	668	604	522
Candida_albicans	779	655	559
yHMPu5000034884_Peterozyma_toletana	760	639	546
Lachancea_cidri	692	625	530
Ashbya_aceri	608	579	495
yHAB153_Kazachstania_rosinii	734	623	526
yHAB164_Kazachstania_aerobia	716	613	518
Nakazawaea_peltata	718	629	538
Dekkera_bruxellensis	673	607	524
yHMPu5000035684_Kloeckera_hatyaiensis	570	537	471
Cyberlindnera_fabianii_JCM3601	731	648	554
yHMPu5000034710_Kluyveromyces_dobzhanskii	694	641	540
yHMPu5000035659_Saturnispora_dispora	617	572	491
Clavispora_lusitaniae	676	616	530
yHMPu5000034613_Saturnispora_serradocipensis	643	584	500
yHMPu5000035651_Torulaspora_microellipsoides	760	650	550
yHMPu5000034754_Lipomyces_arxii	701	624	537
yHMPu5000034957_Hanseniaspora_osmophila	649	581	499
Zygosaccharomyces_rouxii	686	627	534
Lachancea_fermentati	716	641	545
yHMPu5000041840_Candida_wancherniae	648	591	507
Eremothecium_cymbalariae	613	582	496
yHMPu5000034876_Tetrapisispora_iriomotensis	766	631	531
yHMPu5000034748_Lipomyces_oligophaga	649	598	513
yHMPu5000034614_Saturnispora_silvae	634	580	495
Metschnikowia_similis	662	596	515
Eremothecium_gossypii	620	590	502
yHMPu5000035261_Candida_ponderosae	732	645	548
yHMPu5000034978_Cyberlindnera_mrakii	722	634	544
yHMPu5000034998_Cephaloascus_albidus	739	631	535
Hyphopichia_burtonii	675	588	504
Candida_dubliniensis	725	623	532
Botrytis_cinerea	711	615	533
yHMPu5000034885_Ogataea_zsoltii	686	602	515
yHMPu5000034932_Kuraishia_ogatae	718	644	548
yHMPu5000034881_Torulaspora_pretoriensis	840	638	544
yHMPu5000035335_Candida_blattae	703	624	535
yHMPu5000034761_Lipomyces_lipofer	757	621	535
yHAB143_Kazachstania_siamensis	720	607	516
yHAB134_Kazachstania_turicensis	761	638	538
yHMPu5000034999_Cephaloascus_fragrans	742	651	553
Lachancea_mirantina	686	638	543
yHAB155_Kazachstania_spencerorum	748	606	517
Lachancea_meyersii	691	636	541
Saccharomyces_paradoxus	792	648	542
yHMPu5000035643_Yarrowia_bubula	714	623	534
yHMPu5000035296_Priceomyces_carsonii	681	599	514
Lipomyces_starkeyi	723	622	535
Lodderomyces_elongisporus	710	634	542
yHMPu5000034918_Nakazawaea_holstii	708	615	527
yHMPu5000034675_Blastobotrys_mokoenaii	706	629	537
yHMPu5000034963_Hanseniaspora_clermontiae	560	531	465
yHMPu5000035639_Wickerhamomyces_canadensis	717	643	546
yHMPu5000035279_Tortispora_starmeri	637	600	513
Yarrowia_lipolytica	709	624	537
Candida_glabrata	717	629	535
yHMPu5000034627_Pichia_heedii	643	588	503
yHMPu5000034990_Candida_corydali	708	590	503
Naumovozyma_castellii	741	625	523
Spathaspora_passalidarum	713	618	528
Kazachstania_africana	727	620	527
yHMPu5000035672_Phaffomyces_thermotolerans	697	629	536
yHMPu5000034636_Ogataea_nitratoaversa	711	621	528
yHMPu5000034974_Deakozyma_indianensis	677	611	527
Lachancea_nothofagi	711	644	544
Hanseniaspora_valbyensis	588	525	461
Metschnikowia_hawaiiensis	667	607	521
Spathaspora_girioi	712	600	514
Saprochaete_clavata	685	627	538
Scheffersomyces_stipitis	742	638	543
yHAB147_Kazachstania_taianensis	698	600	512
yHMPu5000035252_Yamadazyma_nakazawae	674	597	513
Naumovozyma_dairenensis	755	637	535
yHMPu5000034637_Ogataea_populiabae	673	604	518
yHMPu5000026256_Zygotorulaspora_mrakii	701	638	541
yHMPu5000034661_Dipodascus_albidus	772	628	538
yHMPu5000034606_Priceomyces_medius	665	600	511
yHMPu5000035011_Candida_pyralidae	677	605	522
yHMPu5000034883_Peterozyma_xylosa	729	637	544
yHMPu5000026145_Ambrosiozyma_vanderkliftii	710	623	528
Metschnikowia_santaceciliae	675	619	529
yHMPu5000035654_Tortispora_ganteri	633	588	504
Ogataea_polymorpha	591	537	475
Vanderwaltozyma_polyspora	754	641	538
yHMPu5000034866_Zygosaccharomyces_bisporus	679	623	530
yHMPu5000035665_Middelhovenomyces_tepae	722	634	543
Nakaseomyces_nivariensis	727	630	532
Komagataella_pastoris	652	605	520

## Sheet: Table S7.
Table S7. Enzyme-reaction pair with available k_cat values in the DLKcat results with their corresponding range.
	S. cerevisiae							E. coli
	enzyme_uniprot	reaction	k_cat in model	min k_cat	max k_cat			enzyme_uniprot	reaction	k_cat in model	min k_cat	max k_cat
	P40545	1-(5-phosphoribosyl)-5-[(5-phosphoribosylamino)methylideneamino)imidazole-4-carboxamide isomerase (No1)	115199	402.84	320818			P0A8F4	Cytidine kinase (GTP) (No1)	14.7599	2.52	1.06084e+06
	P07275	1-pyrroline-5-carboxylate dehydrogenase (No1)	5399.86	228.24	176972			P0A9M5	Xanthine phosphoribosyltransferase (No1)	539986	9.72	513976
	P32626	2,3-diketo-5-methylthio-1-phosphopentane degradation reaction (No1)	42480.9	1512.36	2.08465e+06			P69441	Nucleoside-diphosphate kinase (ATP:dGDP) (No1)	1.17e+06	46.8	2.01938e+06
	P33312	2,5-diamino-6-ribosylamino-4(3H)-pyrimidinone 5'-phosphate reductase (NADPH) (No1)	2.39998	925.56	2.07633e+07			P0A763	Nucleoside-diphosphate kinase (ATP:dGDP) (No2)	950390	51.48	1.36085e+06
	P07342	2-aceto-2-hydroxybutanoate synthase (No1)	57960.9	2520.72	511076			P69441	Nucleoside-diphosphate kinase (ATP:dUDP) (No1)	1.17e+06	46.8	2.01938e+06
	P07342	2-aceto-2-hydroxybutanoate synthase (No2)	57960.9	2520.72	511076			P0A763	Nucleoside-diphosphate kinase (ATP:dUDP) (No2)	950390	51.48	1.36085e+06
	P47039	2-aminoadipate transaminase (No3)	5.54385e+06	791.64	1.0006e+06			P69441	Nucleoside-diphosphate kinase (ATP:dADP) (No1)	1.17e+06	46.8	2.01938e+06
	P38787	2-dehydropantoate 2-reductase (No1)	90000.9	174.24	885548			P0A763	Nucleoside-diphosphate kinase (ATP:dADP) (No2)	950390	51.48	1.36085e+06
	P14843	2-deoxy-D-arabino-heptulosonate 7-phosphate synthetase (No1)	439194	110.16	143028			P05020	Dihydroorotase (No1)	6732.19	2171.88	5.64767e+06
	P32449	2-deoxy-D-arabino-heptulosonate 7-phosphate synthetase (No2)	439194	110.16	143028			P08244	Orotidine-5'-phosphate decarboxylase (No1)	151199	196.56	203295
	P27697	2-hexaprenyl-6-methoxy-1,4-benzoquinone methyltransferase (No1)	25199.7	408.24	425922			P07004	Glutamate-5-semialdehyde dehydrogenase (No1)	319785	1581.12	395923
	P41735	2-hexaprenyl-6-methoxy-1,4-benzoquinone methyltransferase (No1)	25199.7	59.76	490599			P08200	Isocitrate dehydrogenase (NADP) (No1)	383039	1476	61041.6
	P49017	2-hexaprenyl-6-methoxy-1,4-benzoquinone methyltransferase (No1)	25199.7	195.48	286307			P0ABP8	Deoxyuridine phosphorylase (No2)	377644	159.12	2.58218e+06
	P53318	2-hexaprenyl-6-methoxy-1,4-benzoquinone methyltransferase (No1)	25199.7	237.96	251475			P0A9Q7	Acetaldehyde dehydrogenase (acetylating) (No2)	56519.5	5751	1.52619e+06
	P27697	2-hexaprenyl-6-methoxyphenol monooxygenase (No1)	3.55316e+06	225	355983			P27550	Acetyl-CoA synthetase (No1)	3.38398e+07	1085.4	894508
	P41735	2-hexaprenyl-6-methoxyphenol monooxygenase (No1)	3.55316e+06	32.76	410037			P0A7A9	Inorganic diphosphatase (No3)	1.404e+06	71.28	2.9202e+06
	P49017	2-hexaprenyl-6-methoxyphenol monooxygenase (No1)	3.55316e+06	109.44	237329			P22259	Phosphoenolpyruvate carboxykinase (No1)	136801	2223.72	57071.9
	P53318	2-hexaprenyl-6-methoxyphenol monooxygenase (No1)	3.55316e+06	132.84	229203			P26616	Malic enzyme (NAD) (No1)	483840	3323.16	291537
	P07264	2-isopropylmalate hydratase (No1)	33372.3	936.36	1.06364e+06			P0A7J0	3,4-Dihydroxy-2-butanone-4-phosphate synthase (No1)	428.633	22.68	791794
	P38891	2-keto-4-methylthiobutyrate transamination (No1)	3.86997e+06	660.96	9.13096e+06			P0AG40	Riboflavin kinase (No1)	24479.8	18	823100
	P47176	2-keto-4-methylthiobutyrate transamination (No2)	3.86997e+06	660.96	9.13096e+06			P0A959	L-alanine transaminase (No1)	4500.05	1297.8	2.84281e+06
	P38840	2-keto-4-methylthiobutyrate transamination (No4)	5.54385e+06	1830.96	3.86355e+06			P77434	L-alanine transaminase (No2)	4500.05	1297.8	2.84281e+06
	P43635	2-methylcitrate synthase (No1)	508673	505.08	351727			P09099	Xylulokinase (No2)	2.37597e+07	1566.36	432471
	P47176	2-oxo-4-methyl-3-carboxypentanoate decarboxylation (No1)	4.44959e+06	437.76	2.26497e+06			P0A9J6	Ribokinase (No1)	172117	1603.44	2.1678e+06
	P38891	2-oxo-4-methyl-3-carboxypentanoate decarboxylation (No1)	4.44959e+06	437.76	2.26497e+06			P0A6F3	Glycerol kinase (No1)	1.76401e+07	303.84	531220
	P32179	3',5'-bisphosphate nucleotidase (No1)	39599.3	298.8	624609			P0A6K6	Phosphopentomutase (No1)	391926	180.72	1.04058e+06
	P22434	3',5'-cyclic-nucleotide phosphodiesterase (No1)	75597.2	120.24	1.24707e+06			P00509	Aspartate transaminase (No1)	1.908e+06	847.08	1.45623e+06
	P06776	3',5'-cyclic-nucleotide phosphodiesterase (No2)	24120.2	142.92	454879			P21599	Pyruvate kinase (No1)	1.15344e+07	3752.28	709041
	P06776	3',5'-cyclic-nucleotide phosphodiesterase (No1)	24120.2	101.16	345927			P0AD61	Pyruvate kinase (No2)	1.15344e+07	3752.28	709041
	P06776	3',5'-cyclic-nucleotide phosphodiesterase (No1)	24120.2	117.72	295681			P0AB80	Isoleucine transaminase (No1)	172801	621.36	4.94084e+06
	P06776	3',5'-cyclic-nucleotide phosphodiesterase (No1)	24120.2	70.92	596857			P0AB80	Valine transaminase (No1)	68399.5	621.36	4.94084e+06
	Q99258	3,4-dihydroxy-2-butanone-4-phosphate synthase (No1)	25199.7	22.68	791794			P0A6A6	2-isopropylmalate hydratase (No1)	2.86738e+08	936.36	1.06364e+06
	P38342	3-dehydrosphinganine reductase (No1)	3851.93	176.76	250705			P30126	2-isopropylmalate hydratase (No1)	2.86738e+08	936.36	1.06364e+06
	P32449	3-deoxy-D-arabino-heptulosonate 7-phosphate synthetase (No1)	439194	110.16	143028			P0A7E3	Orotate phosphoribosyltransferase (No1)	1008	27.36	392899
	P14843	3-deoxy-D-arabino-heptulosonate 7-phosphate synthetase (No2)	439194	110.16	143028			P08142	2-aceto-2-hydroxybutanoate synthase (No1)	255598	2520.72	293066
	P33751	3-hexaprenyl-4-hydroxy-5-methoxybenzoate decarboxylase (No1)	7739.94	1956.6	3.97377e+06			P0ADF8	2-aceto-2-hydroxybutanoate synthase (No1)	255598	2520.72	293066
	Q03034	3-hexaprenyl-4-hydroxy-5-methoxybenzoate decarboxylase (No1)	7739.94	453.96	281914			P00893	2-aceto-2-hydroxybutanoate synthase (No2)	255598	2520.72	293066
	P32643	3-isopropylmalate 3-methyltransferase (No1)	25199.7	61.2	406795			P00894	2-aceto-2-hydroxybutanoate synthase (No2)	255598	2520.72	293066
	P04173	3-isopropylmalate dehydrogenase (No1)	32579.7	758.88	246397			P0A796	Phosphofructokinase (s7p) (No1)	223199	2590.56	279583
	P38122	3-methyl-2-oxobutanoate hydroxymethyltransferase (No1)	2818.81	148.68	1.8926e+06			P05791	Dihydroxy-acid dehydratase (2,3-dihydroxy-3-methylpentanoate) (No1)	472500	171	63103.3
	Q07471	3-methyl-2-oxopentanoate decarboxylase (No1)	683.995	435.96	367396			P00893	Acetolactate synthase (No1)	127800	2520.72	293066
	P26263	3-methyl-2-oxopentanoate decarboxylase (No2)	223199	435.96	367396			P00894	Acetolactate synthase (No1)	127800	2520.72	293066
	P06169	3-methyl-2-oxopentanoate decarboxylase (No3)	223199	435.96	367396			P08142	Acetolactate synthase (No2)	127800	2520.72	293066
	P16467	3-methyl-2-oxopentanoate decarboxylase (No4)	223199	435.96	367396			P0ADF8	Acetolactate synthase (No2)	127800	2520.72	293066
	P37254	4-amino-4-deoxychorismate synthase (No1)	61.1995	411.12	131729			P0A9C0	Glycerol-3-phosphate dehydrogenase (ubiquinone-8) (No1)	119880	1254.96	531567
	Q03266	4-aminobenzoate synthase (No1)	99.3641	482.04	715076			P13033	Glycerol-3-phosphate dehydrogenase (ubiquinone-8) (No1)	119880	1254.96	531567
	P17649	4-aminobutyrate transaminase (No1)	55438.5	639.72	1.20857e+06			P13035	Glycerol-3-phosphate dehydrogenase (ubiquinone-8) (No2)	119880	1254.96	531567
	P16120	4-hydroxy-L-threonine synthase (No1)	12600	3536.28	415076			P00895	Anthranilate synthase (No1)	496796	915.12	207316
	Q07471	4-methyl-2-oxopentanoate decarboxylase (No1)	30599.8	873.72	705390			P00904	Anthranilate synthase (No1)	496796	5267.88	9843.48
	Q06685	4PP-IP5 depyrophosphorylation to IP6 (No1)	136801	2019.96	476897			P00904	Anthranilate phosphoribosyltransferase (No1)	15840.1	30.24	571995
	Q99321	4PP-IP5 depyrophosphorylation to IP6 (No2)	2880.02	11.88	1.47556e+07			P0A9J8	Chorismate mutase (No1)	1.31759e+09	46.8	1.74495e+06
	Q12494	4PP-IP5 pyrophosphorylation to 4,5-PP2-IP4 (No1)	108	1585.44	1.50097e+06			P07023	Chorismate mutase (No2)	1.31759e+09	46.8	1.74495e+06
	Q07938	5'-methylthioadenosine phosphorylase (No1)	935.979	15.48	2.02424e+06			P0AB80	Leucine transaminase (irreversible) (No1)	251997	444.6	764180
	Q99312	5'-nucleotidase (IMP) (No1)	1.353e+06	142.92	576708			P22939	Dimethylallyltranstransferase (No1)	1764.01	242.28	372456
	P38972	5'-phosphoribosylformyl glycinamidine synthetase (No1)	18242.9	3267.36	83538.7			P22939	Geranyltranstransferase (No1)	1764.01	147.24	23420.2
	P53128	5,10-methylenetetrahydrofolate reductase (NADPH) (No1)	576004	1589.4	1.28954e+06			P09126	Uroporphyrinogen-III synthase (No1)	1.79999e+06	61.2	230296
	P46151	5,10-methylenetetrahydrofolate reductase (NADPH) (No2)	576004	1758.6	357389			P29680	Uroporphyrinogen decarboxylase (uroporphyrinogen III) (No1)	1141.2	159.12	82984
	P09950	5-aminolevulinate synthase (No1)	2368.83	418.68	5992.92			P0A6P9	Enolase (No1)	1.43519e+06	4054.68	642824
	Q99321	5-diphosphoinositol-1,2,3,4,6-pentakisphosphate diphosphohydrolase (No1)	2880.02	63	7.72521e+06			P61517	HCO3 equilibration reaction (No1)	1.58401e+10	750.6	6.47932e+09
	Q12494	5-diphosphoinositol-1,2,3,4,6-pentakisphosphate synthase (No1)	108	384.48	701434			P0ABE9	HCO3 equilibration reaction (No2)	1.58401e+10	750.6	6.47932e+09
	P40099	5-formethyltetrahydrofolate cyclo-ligase (No1)	3599.97	42.12	750601			P0ADG7	IMP dehydrogenase (No1)	11160	148.32	124711
	P05694	5-methyltetrahydropteroyltriglutamate-homocysteine S-methyltransferase (No1)	1188	299.52	90495			P04805	Glutamyl-tRNA synthetase (No1)	7920.16	324.36	197268
	Q06489	5-methylthioribose-1-phosphate isomerase (No1)	6.01214e+07	239.04	777071			P0A799	Phosphoglycerate kinase (No1)	1.94401e+06	7545.24	462672
	Q06685	5PP-IP5 pyrophosphorylation to 4,5-PP2-IP4 (No1)	136801	636.12	236861			P0A8F4	Uridine kinase ATPUridine (No1)	1.08e+06	190.44	249007
	Q06685	5PP-IP5 pyrophosphorylation to 5,6-PP2-IP4 (No1)	136801	636.12	236861			P0A8F4	Uridine kinase (GTP:Uridine) (No1)	1.08e+06	2.52	1.06084e+06
	P40433	6-phosphofructo-2-kinase (No1)	504.007	1255.68	2.03242e+06			P0A8F4	ATP:cytidine 5'-phosphotransferase (No1)	14.7599	190.44	249007
	Q12471	6-phosphofructo-2-kinase (No2)	504.007	1255.68	2.03242e+06			P0AG07	Ribulose 5-phosphate 3-epimerase (No1)	3.13205e+06	2583.36	1.31976e+08
	Q06685	6PP-IP5 depyrophosphorylation to IP6 (No1)	136801	2019.96	476897			P30125	3-isopropylmalate dehydrogenase (No1)	248398	758.88	246397
	Q99321	6PP-IP5 depyrophosphorylation to IP6 (No2)	2880.02	11.88	1.47556e+07			P0ABP8	Purine-nucleoside phosphorylase (Adenosine) (No1)	377644	159.12	2.58218e+06
	Q12494	6PP-IP5 pyrophosphorylation to 5,6-PP2-IP4 (No1)	108	1602.36	458223			P0ABP8	Purine-nucleoside phosphorylase (Deoxyadenosine) (No1)	377644	159.12	2.58218e+06
	P26263	acetaldehyde condensation (No1)	223199	837	602867			P45563	Purine-nucleoside phosphorylase (Guanosine) (No1)	377644	159.12	2.58218e+06
	P06169	acetaldehyde condensation (No2)	223199	837	602867			P0ABP8	Purine-nucleoside phosphorylase (Guanosine) (No2)	377644	159.12	2.58218e+06
	P16467	acetaldehyde condensation (No3)	223199	837	602867			P27302	Transketolase (No1)	438481	494.64	121818
	P07342	acetolactate synthase (No1)	28979.6	2520.72	293066			P33570	Transketolase (No2)	438481	494.64	121818
	P07342	acetolactate synthase (No2)	28979.6	2520.72	293066			P45563	Purine-nucleoside phosphorylase (Inosine) (No1)	2.23199e+07	159.12	2.58218e+06
	P27796	acetyl-CoA C-acyltransferase (lauroyl-CoA) (No1)	53279.3	80.28	374711			P0ABP8	Purine-nucleoside phosphorylase (Inosine) (No2)	2.23199e+07	159.12	2.58218e+06
	P32874	acetyl-Coa carboxylase (No1)	42480.9	7177.32	87933.2			P0ABP8	Purine-nucleoside phosphorylase (Deoxyinosine) (No1)	377644	159.12	2.58218e+06
	Q00955	acetyl-CoA carboxylase, reaction (No1)	117617	7177.32	87933.2			P45563	Purine-nucleoside phosphorylase (Deoxyinosine) (No2)	377644	159.12	2.58218e+06
	Q01574	acetyl-CoA synthetase (No1)	224638	1085.4	894508			P45563	Purine-nucleoside phosphorylase (Xanthosine) (No1)	377644	159.12	2.58218e+06
	P52910	acetyl-CoA synthetase (No2)	224638	1085.4	894508			P00452	Ribonucleoside-diphosphate reductase (ADP) (No1)	46440.3	1663.92	498814
	Q01574	acetyl-CoA synthetase (No1)	224638	1085.4	894508			P69924	Ribonucleoside-diphosphate reductase (ADP) (No1)	46440.3	1663.92	498814
	P52910	acetyl-CoA synthetase nuclear (No1)	224638	1085.4	894508			P00452	Ribonucleoside-diphosphate reductase (ADP) (No2)	46440.3	1663.92	498814
	P18544	acteylornithine transaminase (No1)	5580.05	3741.84	243410			P69924	Ribonucleoside-diphosphate reductase (ADP) (No2)	46440.3	1663.92	498814
	P25628	acyl-CoA:sterol acyltransferase (oleoyl-CoA:episterol), ER membrane (No1)	3.71747e+07	25.56	240527			P0A9Q7	Alcohol dehydrogenase (ethanol) (No1)	2.29933e+06	5751	1.52619e+06
	P25628	acyl-CoA:sterol acyltransferase (palmitoleoyl-CoA:episterol), ER membrane (No1)	3.71747e+07	25.56	240527			P39451	Alcohol dehydrogenase (ethanol) (No2)	2.29933e+06	5751	1.52619e+06
	P53909	adenine deaminase (No1)	19800	358.92	736116			P00452	Ribonucleoside-diphosphate reductase (CDP) (No1)	46440.3	480.6	614745
	P36973	adenine phosphoribosyltransferase (No1)	10080	132.48	1.11226e+06			P69924	Ribonucleoside-diphosphate reductase (CDP) (No1)	46440.3	480.6	614745
	P49435	adenine phosphoribosyltransferase (No2)	10080	132.48	1.11226e+06			P00452	Ribonucleoside-diphosphate reductase (CDP) (No2)	46440.3	480.6	614745
	P53909	adenosine deaminase (No1)	19800	366.48	423174			P69924	Ribonucleoside-diphosphate reductase (CDP) (No2)	46440.3	480.6	614745
	P47143	adenosine kinase (No1)	91802.1	114.84	272524			P0A884	Thymidylate synthase (No1)	172801	21.6	613374
	P39954	adenosylhomocysteinase (No1)	2843.98	455.4	51671.5			P0A9C0	Glycerol-3-phosphate dehydrogenase (demethylmenaquinone-8) (No1)	119880	1254.96	531567
	P21182	adenosylmethionine decarboxylase (No1)	6119.95	66.96	322372			P13033	Glycerol-3-phosphate dehydrogenase (demethylmenaquinone-8) (No1)	119880	1254.96	531567
	P50277	adenosylmethionine-8-amino-7-oxononanoate transaminase (No1)	4.32003	1481.76	209700			P00393	NADH dehydrogenase (demethylmenaquinone-8 & 0 protons) (No1)	4.21195e+06	430.56	744609
	P08678	adenylate cyclase (No1)	122401	1675.44	97128.7			P00393	NADH dehydrogenase (menaquinone-8 & 0 protons) (No1)	4.21195e+06	430.56	744609
	Q12055	adenylate kinase (No1)	179999	46.8	2.01938e+06			P61889	Malate dehydrogenase (No1)	1.15199e+06	7769.88	5.49662e+06
	P07170	adenylate kinase (No2)	179999	46.8	2.01938e+06			P22256	4-aminobutyrate transaminase (No1)	170640	639.72	1.20857e+06
	P26364	adenylate kinase (No1)	421195	114.84	5.8782e+06			P50457	4-aminobutyrate transaminase (No2)	170640	639.72	1.20857e+06
	P26364	adenylate kinase (GTP) (No1)	421195	114.84	5.8782e+06			P0AG40	FMN adenylyltransferase (No1)	24479.8	18	823100
	Q05911	adenylosuccinate lyase (No1)	27000	316.08	177656			P40191	Pyridoxine kinase (No1)	1080	293.76	711469
	P80210	adenylosuccinate synthase (No1)	19800	1047.96	716198			P0AFI7	Pyridoxamine 5'-phosphate oxidase (No1)	100800	171.72	6.47041e+06
	Q02196	adenylyl-sulfate kinase (No1)	15840.1	294.84	8.892e+06			P76149	Succinate-semialdehyde dehydrogenase (NAD) (No1)	248398	700.2	387357
	P53314	ADP-ribose 2,3-cyclic phosphodiesterase (No1)	3.38398e+06	137.88	2.34441e+06			P32664	NAD diphosphatase (No1)	69478.2	1.44	152707
	P43567	alanine glyoxylate aminotransferase (No1)	471609	1038.96	585434			P37686	L-threonine dehydrogenase (No2)	1.59515e+06	5751	1.52619e+06
	P40825	alanyl-tRNA synthetase (No1)	432003	2859.48	207787			P27278	Nicotinamide-nucleotide adenylyltransferase (No1)	10.008	45.72	1.13553e+06
	P53296	alcohol acetyltransferase (2-methylbutanol) (No1)	1.4004e+07	944.28	99563.4			P40191	Hydroxymethylpyrimidine kinase (ATP) (No2)	11880	462.24	739304
	P40353	alcohol acetyltransferase (2-methylbutanol) (No2)	1.4004e+07	944.28	99563.4			P24182	Acetyl-CoA carboxylase (No1)	108360	7177.32	87933.2
	P53296	alcohol acetyltransferase (isoamyl alcohol) (No1)	1.4004e+07	944.28	99563.4			P0A7B3	NAD kinase (No1)	450005	126.72	128541
	P40353	alcohol acetyltransferase (isoamyl alcohol) (No2)	1.4004e+07	944.28	99563.4			P0AC86	Glycogen phosphorylase (No1)	181798	424.8	180121
	P53296	alcohol acetyltransferase (isobutyl alcohol) (No1)	1.4004e+07	944.28	99563.4			P00490	Glycogen phosphorylase (No2)	181798	424.8	180121
	P40353	alcohol acetyltransferase (isobutyl alcohol) (No2)	1.4004e+07	944.28	99563.4			P0A7F6	Adenosylmethionine decarboxylase (No1)	3599.97	66.96	322372
	P53296	alcohol acetyltransferase (phenylethanol alcohol) (No1)	1.4004e+07	944.28	99563.4			P0AC81	Lactoylglutathione lyase (No1)	1.1016e+06	2242.8	2.04028e+07
	P40353	alcohol acetyltransferase (phenylethanol alcohol) (No2)	1.4004e+07	944.28	99563.4			P0A6E4	Argininosuccinate synthase (No1)	2473.78	291.96	206470
	P00331	alcohol dehydrogenase (ethanol to acetaldehyde) (No1)	514801	5751	1.52619e+06			P0A9G6	Isocitrate lyase (No1)	102600	5425.56	1.70211e+06
	P38715	alcohol dehydrogenase (glycerol, NADP) (No2)	1980	90	521576			P0ACC7	UDP-N-acetylglucosamine diphosphorylase (No1)	1.188e+06	163.08	160537
	P10127	mitochondrial alcohol dehydrogenase (No1)	3.24002e+06	3080.16	4.37009e+06			P0A9P0	Glycine Cleavage System (No1)	1.82159e+06	1249.56	1.34705e+06
	P07246	mitochondrial alcohol dehydrogenase (No2)	1.0188e+06	3080.16	4.37009e+06			P27248	Glycine Cleavage System (No1)	1.82159e+06	1190.52	338668
	P38113	aldehyde dehydrogenase (2-methylbutanol, NAD) (No1)	31968.3	1808.64	3.99446e+06			P33195	Glycine Cleavage System (No1)	1.82159e+06	1108.44	460476
	P32771	aldehyde dehydrogenase (2-methylbutanol, NAD) (No2)	124200	614.16	1.08019e+06			P30011	Nicotinate-nucleotide diphosphorylase (carboxylating) (No1)	504.007	30.24	1.52395e+07
	P00330	aldehyde dehydrogenase (2-methylbutanol, NAD) (No3)	3.24002e+06	1808.64	3.99446e+06			Q47690	Homocysteine S-methyltransferase (No1)	1368.01	165.24	349714
	P10127	aldehyde dehydrogenase (2-methylbutanol, NAD) (No1)	3.24002e+06	1808.64	3.99446e+06			P40191	Pyridoxal kinase (No1)	8280.2	462.24	739304
	P07246	aldehyde dehydrogenase (2-methylbutanol, NAD) (No2)	31968.3	1808.64	3.99446e+06			P77150	Pyridoxal kinase (No2)	8280.2	462.24	739304
	P25377	aldehyde dehydrogenase (2-methylbutanol, NADP) (No1)	23400	669.6	4.96625e+06			P0A6I6	Pantetheine-phosphate adenylyltransferase (No1)	17470.9	110.88	1.22874e+06
	Q04894	aldehyde dehydrogenase (2-methylbutanol, NADP) (No3)	3.24002e+06	669.6	4.96625e+06			P0A7I7	GTP cyclohydrolase II (25drapp) (No1)	539.986	114.12	632172
	P38113	aldehyde dehydrogenase (2-phenylethanol, NAD) (No1)	31968.3	3080.16	4.37009e+06			P21156	Sulfate adenyltransferase (No1)	83521.3	902.88	300673
	P32771	aldehyde dehydrogenase (2-phenylethanol, NAD) (No2)	124200	614.16	1.08019e+06			P23845	Sulfate adenyltransferase (No1)	83521.3	902.88	300673
	P00330	aldehyde dehydrogenase (2-phenylethanol, NAD) (No3)	3.24002e+06	3080.16	4.37009e+06			P39451	Alcohol dehydrogenase (glycerol) (No1)	5.92557e+06	3080.16	4.37009e+06
	P10127	aldehyde dehydrogenase (2-phenylethanol, NAD) (No1)	3.24002e+06	3080.16	4.37009e+06			P0A9Q7	Alcohol dehydrogenase (glycerol) (No2)	5.92557e+06	3080.16	4.37009e+06
	P07246	aldehyde dehydrogenase (2-phenylethanol, NAD) (No2)	31968.3	3080.16	4.37009e+06			P0A796	Phosphofructokinase (No1)	223199	2590.56	279583
	P25377	aldehyde dehydrogenase (2-phenylethanol, NADP) (No1)	23400	669.6	4.96625e+06			P00903	4-amino-4-deoxychorismate synthase (No1)	2412.02	411.12	131729
	Q04894	aldehyde dehydrogenase (2-phenylethanol, NADP) (No2)	3.24002e+06	669.6	4.96625e+06			P05041	4-amino-4-deoxychorismate synthase (No1)	2412.02	411.12	131729
	Q04458	aldehyde dehydrogenase (3-aminopropanal, NAD) (No1)	243002	2096.28	310043			P28305	4-aminobenzoate synthase (No1)	1.29024e+06	482.04	715076
	P54114	aldehyde dehydrogenase (3-aminopropanal, NAD) (No2)	243002	2096.28	310043			P0A9C0	Glycerol-3-phosphate dehydrogenase (menaquinone-8) (No1)	119880	1254.96	531567
	P47771	aldehyde dehydrogenase (3-aminopropanal, NAD) (No3)	114120	2096.28	310043			P13033	Glycerol-3-phosphate dehydrogenase (menaquinone-8) (No1)	119880	1254.96	531567
	P38113	aldehyde dehydrogenase (isoamyl alcohol, NAD) (No1)	31968.3	3080.16	4.37009e+06			P0A8F0	Uracil phosphoribosyltransferase (No1)	18360.1	33.12	92436.8
	P32771	aldehyde dehydrogenase (isoamyl alcohol, NAD) (No2)	124200	614.16	1.08019e+06			P0A7E5	CTP synthase (glutamine) (No1)	50400.7	996.84	2.64522e+06
	P00330	aldehyde dehydrogenase (isoamyl alcohol, NAD) (No3)	3.24002e+06	3080.16	4.37009e+06			P69441	Nucleoside-diphosphate kinase (ATP:dCDP) (No1)	1.17e+06	46.8	2.01938e+06
	P10127	aldehyde dehydrogenase (isoamyl alcohol, NAD) (No1)	3.24002e+06	3080.16	4.37009e+06			P0A763	Nucleoside-diphosphate kinase (ATP:dCDP) (No2)	950390	51.48	1.36085e+06
	P07246	aldehyde dehydrogenase (isoamyl alcohol, NAD) (No2)	31968.3	3080.16	4.37009e+06			P69503	Adenine phosphoribosyltransferase (No1)	33587.5	132.48	1.11226e+06
	P38113	aldehyde dehydrogenase (isobutyl alcohol, NAD) (No1)	31968.3	3080.16	4.37009e+06			P69441	Adenylate kinase (No1)	1.17e+06	46.8	2.01938e+06
	P32771	aldehyde dehydrogenase (isobutyl alcohol, NAD) (No2)	124200	614.16	1.08019e+06			P69441	Nucleoside-diphosphate kinase (ATP:UDP) (No1)	1.17e+06	46.8	2.01938e+06
	P00330	aldehyde dehydrogenase (isobutyl alcohol, NAD) (No3)	3.24002e+06	3080.16	4.37009e+06			P0A763	Nucleoside-diphosphate kinase (ATP:UDP) (No2)	950390	51.48	1.36085e+06
	P10127	aldehyde dehydrogenase (isobutyl alcohol, NAD) (No1)	3.24002e+06	3080.16	4.37009e+06			P0A763	Nucleoside-diphosphate kinase (ATP:CDP) (No1)	950390	51.48	1.36085e+06
	P07246	aldehyde dehydrogenase (isobutyl alcohol, NAD) (No2)	31968.3	3080.16	4.37009e+06			P69441	Nucleoside-diphosphate kinase (ATP:CDP) (No2)	1.17e+06	46.8	2.01938e+06
	P25377	aldehyde dehydrogenase (isobutyl alcohol, NADP) (No1)	23400	669.6	4.96625e+06			P69441	Nucleoside-diphosphate kinase (ATP:dTDP) (No1)	1.17e+06	46.8	2.01938e+06
	Q04894	aldehyde dehydrogenase (isobutyl alcohol, NADP) (No2)	3.24002e+06	669.6	4.96625e+06			P0A763	Nucleoside-diphosphate kinase (ATP:dTDP) (No2)	950390	51.48	1.36085e+06
	P54114	aldehyde dehydrogenase (phenylacetaldehyde, NAD) (No1)	179999	2096.28	310043			P31441	Adenine deaminase (No1)	719994	358.92	736116
	P47771	aldehyde dehydrogenase (phenylacetaldehyde, NAD) (No2)	114120	2096.28	310043			P0AGK1	Hydroxybenzoate octaprenyltransferase (No1)	7.19994	4.32	2.01857e+06
	P38113	aldehyde dehydrogenase (tryptophol, NAD) (No1)	31968.3	1808.64	3.99446e+06			P0A6I3	Pantothenate kinase (No1)	4104.08	21.96	648279
	P32771	aldehyde dehydrogenase (tryptophol, NAD) (No2)	124200	614.16	1.08019e+06			P0A7D4	Adenylosuccinate synthase (No1)	10584	1047.96	716198
	P00330	aldehyde dehydrogenase (tryptophol, NAD) (No3)	3.24002e+06	1808.64	3.99446e+06			P0A6I9	Dephospho-CoA kinase (No1)	173.16	51.84	1.77895e+06
	P10127	aldehyde dehydrogenase (tryptophol, NAD) (No1)	3.24002e+06	1808.64	3.99446e+06			P22106	Asparagine synthetase (No2)	10584	1391.04	368173
	P07246	aldehyde dehydrogenase (tryptophol, NAD) (No2)	31968.3	1808.64	3.99446e+06			P00547	Homoserine kinase (No1)	65880.5	242.64	223259
	P11491	alkaline phosphatase (dihydroneopterin) (No1)	425333	201.24	143914			P50457	Succinyldiaminopimelate transaminase (No2)	170640	639.72	1.20857e+06
	P25335	allantoate amidinohydrolase (No1)	2.7e+06	9092.52	5.10123e+07			P22256	Succinyldiaminopimelate transaminase (No4)	170640	639.72	1.20857e+06
	P22580	amidase (No1)	2.59774e+07	67.68	248519			P00934	Threonine synthase (No1)	14400.1	1596.96	466984
	Q03557	amidase (No2)	42480.9	51.12	171489			P60546	Deoxyguanylate kinase (dGMP:ATP) (No1)	324002	331.92	2.52285e+06
	P07285	anthranilate phosphoribosyltransferase (No1)	10440	30.24	571995			P0A720	DTMP kinase (No1)	137159	54.36	7.64783e+06
	P00899	anthranilate synthase (No1)	2087.99	915.12	207316			P69441	Nucleoside-diphosphate kinase (ATP:GDP) (No1)	1.17e+06	46.8	2.01938e+06
	P00937	anthranilate synthase (No1)	2087.99	915.12	207316			P0A763	Nucleoside-diphosphate kinase (ATP:GDP) (No2)	950390	124.56	2.22592e+06
	P38715	arabinose reductase (No1)	957579	90	521576			P00888	3-deoxy-D-arabino-heptulosonate 7-phosphate synthetase (No1)	439194	110.16	143028
	P22768	argininosuccinate synthase (No1)	62107.9	291.96	206470			P0AB91	3-deoxy-D-arabino-heptulosonate 7-phosphate synthetase (No2)	439194	110.16	143028
	Q05506	arginyl-tRNA synthetase (No1)	64441.3	415.08	262446			P00887	3-deoxy-D-arabino-heptulosonate 7-phosphate synthetase (No3)	439194	110.16	143028
	P38714	arginyl-tRNA synthetase (No1)	64441.3	415.08	262446			P21369	Nicotinamidase (No1)	41939.3	6.48	253822
	P49090	asparagine synthase (glutamine-hydrolysing) (No1)	6119.95	1391.04	368173			P09546	1-pyrroline-5-carboxylate dehydrogenase (No1)	18576	228.24	176972
	P49089	asparagine synthase (glutamine-hydrolysing) (No2)	6119.95	1391.04	368173			P08997	Malate synthase (No1)	173160	842.4	223587
	P38707	Asparaginyl-tRNA synthetase (No1)	36359.7	268.2	235249			P37330	Malate synthase (No2)	173160	842.4	223587
	P25345	asparaginyl-tRNA synthetase, miotchondrial (No1)	36359.7	268.2	235249			P31678	Trehalose-phosphatase (No1)	52559.7	120.96	372673
	P10869	aspartate kinase (No1)	817194	192.24	441010			P04079	GMP synthase (No1)	10980	2766.24	196527
	P23542	aspartate transaminase (No1)	1.15921e+06	847.08	1.45623e+06			P27550	Acetate-CoA ligase (ADP-forming) (No1)	362161	1085.4	894508
	Q01802	aspartate transaminase (No1)	2.06641e+06	668.16	656961			P0AEP3	UTP-glucose-1-phosphate uridylyltransferase (irreversible) (No1)	336383	276.48	152720
	P23542	aspartate transaminase (No1)	1.15921e+06	847.08	1.45623e+06			P52006	Nucleoside triphosphate pyrophosphorylase (dttp) (No2)	154801	81	725789
	P13663	aspartate-semialdehyde dehydrogenase (No1)	683293	1175.04	887268			P25536	Nucleoside triphosphate pyrophosphorylase (dttp) (No3)	154801	81	725789
	P04802	Aspartyl-tRNA synthetase (No1)	24120.2	1414.44	444264			P0A9L8	Pyrroline-5-carboxylate reductase (No1)	1.44001e+07	39.6	571383
	P15179	Aspartyl-tRNA synthetase (No1)	24120.2	1414.44	444264			P0A9P0	2-Oxogluterate dehydrogenase (No1)	1.82159e+06	1249.56	1.34705e+06
	P22108	ATP adenylyltransferase (No1)	345602	78.84	452677			P0AFG3	2-Oxogluterate dehydrogenase (No1)	1.82159e+06	129.24	74013.1
	P16550	ATP adenylyltransferase (No1)	345602	78.84	452677			P0AFG6	2-Oxogluterate dehydrogenase (No1)	1.82159e+06	188.64	541269
	P16550	ATP adenylyltransferase (No1)	345602	43.2	334175			P0ABF6	Deoxycytidine deaminase (No1)	1.55841e+07	14.76	1.4176e+06
	P00498	ATP phosphoribosyltransferase (No1)	9720.06	179.64	120992			P13000	Dethiobiotin synthase (No1)	5.04007	1069.2	2.84035e+06
	P00830	ATP synthase (No1)	1.404e+06	135.36	300579			P60757	ATP phosphoribosyltransferase (No1)	9720.06	179.64	120992
	P00830	ATP synthase (No2)	144001	135.36	300579			P25524	Cytosine deaminase (No1)	666001	55.08	1.20966e+08
	P05030	ATPase, cytosolic (No1)	10800	9981.72	14636.2			P17169	Glutamine-fructose-6-phosphate transaminase (No1)	61919.5	130.32	59872.3
	P19657	ATPase, cytosolic (No2)	10800	9981.72	14636.2			P06987	Imidazoleglycerol-phosphate dehydratase (No1)	3.59997e+06	175.32	1.37572e+06
	P32451	biotin synthase (No1)	1.98	22.68	372696			P0A717	Phosphoribosylpyrophosphate synthetase (No1)	2375.97	234	158500
	P54781	C-22 sterol desaturase (NADP) (No1)	53.9986	180.36	247783			P0A6W9	Gamma-glutamylcysteine synthetase (No1)	168839	1802.16	216156
	P53199	C-3 sterol dehydrogenase (No1)	4.29111e+07	1098.72	1.07123e+06			P77454	Glutaminase (No1)	363597	9023.4	553746
	P53199	C-3 sterol dehydrogenase (4-methylzymosterol) (No1)	4.29111e+07	1018.08	1.11283e+06			P0A6W0	Glutaminase (No2)	363597	9023.4	553746
	P32353	C-5 sterol desaturase (No1)	53.9986	889.56	1.46909e+06			P10371	1-(5-phosphoribosyl)-5-[(5-phosphoribosylamino)methylideneamino)imidazole-4-carboxamide isomerase (No1)	51480.1	402.84	320818
	P25340	C-s24 sterol reductase (No1)	2486.39	1779.48	5.57505e+06			P0AG16	Glutamine phosphoribosyldiphosphate amidotransferase (No1)	231166	1330.92	386806
	P22007	CAAX farnesyltransferase (No1)	4681.87	10.44	619362			P16703	Cysteine synthase (No1)	86400.6	1311.12	2.91537e+06
	P29703	CAAX farnesyltransferase (No1)	4681.87	10.44	619362			P0ABK5	Cysteine synthase (No2)	86400.6	1311.12	2.91537e+06
	P07259	carbamoyl-phosphate synthase (glutamine-hydrolysing) (No1)	9.57579e+06	290.88	511032			P22255	3',5'-bisphosphate nucleotidase (No1)	41040.8	298.8	624609
	P03965	carbamoyl-phosphate synthase (glutamine-hydrolysing) (No1)	9.57579e+06	290.88	511032			P00561	Aspartate kinase (No1)	204119	192.24	441010
	P07258	carbamoyl-phosphate synthase (glutamine-hydrolysing) (No1)	9.57579e+06	290.88	511032			P00562	Aspartate kinase (No2)	204119	192.24	441010
	P38992	ceramide-1 hydroxylase (24C) (No1)	3.24002e+06	185.04	1.32871e+06			P08660	Aspartate kinase (No3)	204119	192.24	441010
	P38992	ceramide-1 hydroxylase (26C) (No1)	3.24002e+06	185.04	1.32871e+06			P04391	Ornithine carbamoyltransferase (No1)	1.22401e+07	1488.96	3.85111e+06
	P20485	choline kinase (No1)	9180.21	718.2	524172			P06960	Ornithine carbamoyltransferase (No2)	1.22401e+07	1488.96	3.85111e+06
	P13259	choline phosphate cytididyltransferase (No1)	119880	87.48	1.24502e+06			P08179	Phosphoribosylglycinamide formyltransferase (No1)	144001	50.76	476293
	P32178	chorismate mutase (No1)	1.2996e+06	46.8	1.74495e+06			P00509	Phenylalanine transaminase (No2)	432003	847.08	1.45623e+06
	P35196	cis-prenyltransferase step 01 (No1)	11880	25.56	539262			P0AB80	Phenylalanine transaminase (No3)	10440	621.36	4.94084e+06
	Q03175	cis-prenyltransferase step 01 (No2)	11880	25.56	539262			P0A817	Methionine adenosyltransferase (No1)	5399.86	3096	319963
	P35196	cis-prenyltransferase step 02 (No1)	1224.01	41.4	1.45555e+06			P09099	1-Deoxy-D-xylulose kinase (No1)	1799.99	1566.36	432471
	Q03175	cis-prenyltransferase step 02 (No2)	1224.01	41.4	1.45555e+06			P22256	Acetylornithine transaminase (No3)	170640	639.72	1.20857e+06
	P35196	cis-prenyltransferase step 03 (No1)	133.2	41.4	1.45555e+06			P50457	Acetylornithine transaminase (No4)	170640	639.72	1.20857e+06
	Q03175	cis-prenyltransferase step 03 (No2)	133.2	41.4	1.45555e+06			P0ACB2	Porphobilinogen synthase (No1)	8910.27	610.56	132311
	P35196	cis-prenyltransferase step 04 (No1)	133.2	41.4	1.45555e+06			P0ABQ0	Phosphopantothenate-cysteine ligase (No1)	10440	54	558593
	Q03175	cis-prenyltransferase step 04 (No2)	133.2	41.4	1.45555e+06			P15254	Phosphoribosylformylglycinamidine synthase (No1)	18242.9	3267.36	83538.7
	P35196	cis-prenyltransferase step 05 (No1)	133.2	41.4	1.45555e+06			P23721	Phosphoserine transaminase (No1)	8963.79	1564.56	701392
	Q03175	cis-prenyltransferase step 05 (No2)	133.2	41.4	1.45555e+06			P00936	Adenylate cyclase (No1)	6012.14	1675.44	97128.7
	P35196	cis-prenyltransferase step 06 (No1)	133.2	41.4	1.45555e+06			P0A9B2	Glyceraldehyde-3-phosphate dehydrogenase (No1)	251997	1113.12	734802
	Q03175	cis-prenyltransferase step 06 (No2)	133.2	41.4	1.45555e+06			P0A6V8	Hexokinase (D-glucose:ATP) (No1)	1.47599e+06	260.28	116315
	P35196	cis-prenyltransferase step 07 (No1)	133.2	41.4	1.45555e+06			P00350	Phosphogluconate dehydrogenase (No1)	79560.8	7698.24	184548
	Q03175	cis-prenyltransferase step 07 (No2)	133.2	41.4	1.45555e+06			P0AC53	Glucose 6-phosphate dehydrogenase (No1)	1.26e+07	430.92	410515
	P35196	cis-prenyltransferase step 08 (No1)	133.2	41.4	1.45555e+06			P00968	Carbamoyl-phosphate synthase (glutamine-hydrolysing) (No1)	33839.8	290.88	511032
	Q03175	cis-prenyltransferase step 08 (No2)	133.2	41.4	1.45555e+06			P0A6F1	Carbamoyl-phosphate synthase (glutamine-hydrolysing) (No1)	33839.8	290.88	511032
	P35196	cis-prenyltransferase step 09 (No1)	133.2	41.4	1.45555e+06			P0A7B5	Glutamate 5-kinase (No1)	63905.9	1896.48	604792
	Q03175	cis-prenyltransferase step 09 (No2)	133.2	41.4	1.45555e+06			P00393	NADH dehydrogenase (ubiquinone-8 ) (No1)	4.21195e+06	430.56	744609
	P35196	cis-prenyltransferase step 10 (No1)	133.2	41.4	1.45555e+06			P00490	Maltodextrin phosphorylase (maltoheptaose) (No1)	1.1232e+06	424.8	180121
	Q03175	cis-prenyltransferase step 10 (No2)	133.2	41.4	1.45555e+06			P0AGB0	Phosphoserine phosphatase (L-serine) (No1)	539.986	1107.72	1.271e+06
	P35196	cis-prenyltransferase step 11 (No1)	133.2	41.4	1.45555e+06			P0A6J1	Adenylyl-sulfate kinase (No1)	979240	294.84	8.892e+06
	Q03175	cis-prenyltransferase step 11 (No2)	133.2	41.4	1.45555e+06			P06721	Cystathionine b-lyase (No1)	163079	345.6	255932
	P35196	cis-prenyltransferase step 12 (No1)	133.2	41.4	1.45555e+06			P23256	Cystathionine b-lyase (No2)	163079	345.6	255932
	Q03175	cis-prenyltransferase step 12 (No2)	133.2	41.4	1.45555e+06			P00935	O-succinylhomoserine lyase (L-cysteine) (No1)	435597	2019.6	101164
	P35196	cis-prenyltransferase step 13 (No1)	133.2	41.4	1.45555e+06			P76149	Succinate-semialdehyde dehydrogenase (NADP) (No1)	81360.3	700.2	387357
	Q03175	cis-prenyltransferase step 13 (No2)	133.2	41.4	1.45555e+06			P0A9T0	(S)-alpha-hydroxyglutarate dehydrogenase (No1)	530645	262.8	90260.6
	P35196	cis-prenyltransferase step 14 (No1)	133.2	41.4	1.45555e+06			P00490	Maltodextrin phosphorylase (maltohexaose) (No1)	181798	424.8	180121
	Q03175	cis-prenyltransferase step 14 (No2)	133.2	41.4	1.45555e+06			P38135	Fatty-acid-CoA ligase (hexadecanoate transport via vectoral Co-A coupling) (No1)	104.4	462.6	910174
	P35196	cis-prenyltransferase step 15 (No1)	133.2	41.4	1.45555e+06			P69451	Fatty-acid-CoA ligase (hexadecanoate transport via vectoral Co-A coupling) (No2)	104.4	1083.24	419170
	Q03175	cis-prenyltransferase step 15 (No2)	133.2	41.4	1.45555e+06			P38135	Fatty-acid-CoA ligase (octadecanoate transport via vectoral Co-A coupling) (No1)	104.4	462.6	910174
	P35196	cis-prenyltransferase step 16 (No1)	133.2	41.4	1.45555e+06			P69451	Fatty-acid-CoA ligase (octadecanoate transport via vectoral Co-A coupling) (No2)	104.4	1083.24	419170
	Q03175	cis-prenyltransferase step 16 (No2)	133.2	41.4	1.45555e+06			P0A6T5	GTP cyclohydrolase I (No1)	12.6	16.92	190011
	P35196	cis-prenyltransferase step 17 (No1)	133.2	41.4	1.45555e+06			P0ABB0	ATP synthase (four protons for one ATP) (periplasm) (No1)	71999.4	135.36	300579
	Q03175	cis-prenyltransferase step 17 (No2)	133.2	41.4	1.45555e+06			P0ABB4	ATP synthase (four protons for one ATP) (periplasm) (No1)	71999.4	135.36	300579
	P35196	cis-prenyltransferase step 18 (No1)	133.2	41.4	1.45555e+06			P0ABB0	ATP synthase (four protons for one ATP) (periplasm) (No2)	71999.4	135.36	300579
	Q03175	cis-prenyltransferase step 18 (No2)	133.2	41.4	1.45555e+06			P0ABB4	ATP synthase (four protons for one ATP) (periplasm) (No2)	71999.4	135.36	300579
	P35196	cis-prenyltransferase step 19 (No1)	133.2	41.4	1.45555e+06			P0AAF6	L-arginine transport via ABC system (periplasm) (No2)	1.026e+06	870.12	344269
	Q03175	cis-prenyltransferase step 19 (No2)	133.2	41.4	1.45555e+06			P60546	Guanylate kinase (GMP:ATP) (No1)	324002	331.92	2.52285e+06
	P00890	citrate synthase (No1)	508673	505.08	351727			P08192	Dihydrofolate synthase (No1)	38015.6	1110.24	110166
	P43635	citrate synthase (No2)	508673	505.08	351727			P33360	Choline transport via ABC system (periplasm) (No1)	1.026e+06	870.12	344269
	P28274	CTP synthase (glutamine) (No1)	50400.7	996.84	1.25286e+06			P75959	N-acetylglucosamine kinase (No1)	234000	82.44	438702
	P38627	CTP synthase (glutamine) (No2)	50400.7	996.84	1.25286e+06			P25665	Methionine synthase (No2)	1620.01	299.52	90495
	P28274	CTP synthase (NH3) (No1)	50400.7	996.84	2.64522e+06			P0A7D7	Phosphoribosylaminoimidazolesuccinocarboxamide synthase (No1)	278715	157.68	454774
	P38627	CTP synthase (NH3) (No2)	50400.7	996.84	2.64522e+06			Q59385	Copper (Cu +1) ABC transporter (periplasm) (No1)	1.026e+06	3709.08	250391
	P43623	cystathionine b-lyase (No1)	3276	345.6	255932			P37617	Mercury (Hg+2) ABC transporter (periplasm) (No1)	1.026e+06	3090.96	101470
	P53101	cystathionine b-lyase (No2)	3276	345.6	255932			P37146	Ribonucleoside-diphosphate reductase (CDP) (glutaredoxin) (No1)	46440.3	480.6	614745
	P32582	cystathionine beta-synthase (No1)	77399.4	1003.68	271119			P39452	Ribonucleoside-diphosphate reductase (CDP) (glutaredoxin) (No1)	46440.3	480.6	614745
	P31373	cystathionine g-lyase (No1)	6515.93	213.48	133568			P37146	Ribonucleoside-diphosphate reductase (CDP) (glutaredoxin) (No2)	46440.3	480.6	614745
	P06106	cysteine synthase (No1)	835213	1311.12	2.91537e+06			P39452	Ribonucleoside-diphosphate reductase (CDP) (glutaredoxin) (No2)	46440.3	480.6	614745
	P53852	cysteinyl-tRNA synthetase (No1)	37079.6	2075.04	314488			P37146	Ribonucleoside-diphosphate reductase (CDP) (glutaredoxin) (No3)	46440.3	480.6	614745
	P27515	cytidine kinase (GTP) (No1)	11519.9	2.52	1.06084e+06			P39452	Ribonucleoside-diphosphate reductase (CDP) (glutaredoxin) (No3)	46440.3	480.6	614745
	Q12178	cytosine deaminase (No1)	611995	55.08	1.20966e+08			P37146	Ribonucleoside-diphosphate reductase (CDP) (glutaredoxin) (No4)	46440.3	480.6	614745
	P54783	D-arabinono-1,4-lactone oxidase (No1)	75238.9	2657.52	4.7222e+06			P39452	Ribonucleoside-diphosphate reductase (CDP) (glutaredoxin) (No4)	46440.3	480.6	614745
	Q04212	D-arabinose 1-dehydrogenase (NAD) (No1)	448430	93.96	267691			P37146	Ribonucleoside-diphosphate reductase (ADP) (glutaredoxin) (No1)	46440.3	1663.92	498814
	Q07786	D-sorbitol dehydrogenase (D-fructose producing) (No1)	579609	91.08	181107			P39452	Ribonucleoside-diphosphate reductase (ADP) (glutaredoxin) (No1)	46440.3	1663.92	498814
	P35497	D-sorbitol dehydrogenase (D-fructose producing) (No2)	579609	91.08	181107			P37146	Ribonucleoside-diphosphate reductase (ADP) (glutaredoxin) (No2)	46440.3	1663.92	498814
	P06773	dCMP deaminase (No1)	5.04007e+06	53.28	778319			P39452	Ribonucleoside-diphosphate reductase (ADP) (glutaredoxin) (No2)	46440.3	1663.92	498814
	P06773	dCTP deaminase (No1)	20520	43.56	571805			P37146	Ribonucleoside-diphosphate reductase (ADP) (glutaredoxin) (No3)	46440.3	1663.92	498814
	P53909	deoxyadenosine deaminase (No1)	19800	130.68	202713			P39452	Ribonucleoside-diphosphate reductase (ADP) (glutaredoxin) (No3)	46440.3	1663.92	498814
	Q06549	deoxycytidine deaminase (No1)	10697.7	14.76	1.4176e+06			P37146	Ribonucleoside-diphosphate reductase (ADP) (glutaredoxin) (No4)	46440.3	1663.92	498814
	P15454	deoxyguanylate kinase (dGMP:ATP) (No1)	324002	331.92	2.52285e+06			P39452	Ribonucleoside-diphosphate reductase (ADP) (glutaredoxin) (No4)	46440.3	1663.92	498814
	P38791	deoxyhypusine synthase, cytosolic/mitochondrial (No1)	53.9986	379.8	217788			P37146	Ribonucleoside-diphosphate reductase (GDP) (glutaredoxin) (No1)	46440.3	410.04	332325
	P25332	deoxyribokinase (No1)	36720.2	1603.44	2.1678e+06			P39452	Ribonucleoside-diphosphate reductase (GDP) (glutaredoxin) (No1)	46440.3	410.04	332325
	Q03941	dephospho-CoA kinase (No1)	173.16	51.84	1.77895e+06			P37146	Ribonucleoside-diphosphate reductase (GDP) (glutaredoxin) (No2)	46440.3	410.04	332325
	P53630	dethiobiotin synthase (No1)	5.04007	1069.2	2.84035e+06			P39452	Ribonucleoside-diphosphate reductase (GDP) (glutaredoxin) (No2)	46440.3	410.04	332325
	Q02896	dihydroceramidase (No1)	579609	194.76	643570			P37146	Ribonucleoside-diphosphate reductase (GDP) (glutaredoxin) (No3)	46440.3	410.04	332325
	Q02896	dihydroceramidase (No1)	579609	173.16	583056			P39452	Ribonucleoside-diphosphate reductase (GDP) (glutaredoxin) (No3)	46440.3	410.04	332325
	Q02896	dihydroceramidase (No1)	579609	172.8	586394			P37146	Ribonucleoside-diphosphate reductase (GDP) (glutaredoxin) (No4)	46440.3	410.04	332325
	P07807	dihydrofolate reductase (No1)	219241	57.96	1.95599e+06			P39452	Ribonucleoside-diphosphate reductase (GDP) (glutaredoxin) (No4)	46440.3	410.04	332325
	P07807	dihydrofolate reductase (No1)	219241	57.96	1.95599e+06			P69451	Fatty-acid-CoA ligase (octanoate transport via vectoral Co-A coupling) (No1)	104.4	1083.24	419170
	Q12676	dihydrofolate synthase (No1)	43.7101	1774.8	301653			P38135	Fatty-acid-CoA ligase (octanoate transport via vectoral Co-A coupling) (No2)	104.4	462.6	910174
	P20051	dihydroorotase (No1)	6732.19	2171.88	5.64767e+06			P69451	Fatty-acid-CoA ligase (hexanoate transport via vectoral Co-A coupling) (No1)	104.4	1083.24	419170
	P39522	dihydroxy-acid dehydratase (2,3-dihydroxy-3-methylpentanoate) (No1)	90000.9	171	63103.3			P38135	Fatty-acid-CoA ligase (hexanoate transport via vectoral Co-A coupling) (No2)	104.4	462.6	910174
	P08524	dimethylallyltranstransferase (No1)	3959.93	242.28	372456			P69451	Fatty-acid-CoA ligase (decanoate transport via vectoral Co-A coupling) (No1)	104.4	1083.24	419170
	Q12494	diphosphoinositol-1,3,4,6-tetrakisphosphate synthase (No1)	108	384.48	701434			P38135	Fatty-acid-CoA ligase (decanoate transport via vectoral Co-A coupling) (No2)	104.4	462.6	910174
	P32469	diphthine synthase (No1)	25199.7	353.88	188649			P38135	Fatty-acid-CoA ligase (dodecanoate transport via vectoral Co-A coupling) (No1)	104.4	462.6	910174
	P20048	dolichol kinase (No1)	71999.4	146.88	369094			P69451	Fatty-acid-CoA ligase (dodecanoate transport via vectoral Co-A coupling) (No2)	104.4	1083.24	419170
	P00572	dTMP kinase (No1)	12240.1	54.36	7.64783e+06			P38135	Fatty-acid-CoA ligase (tetradecanoate transport via vectoral Co-A coupling) (No1)	104.4	462.6	910174
	P47119	dUTP diphosphatase (No1)	1.6164e+06	48.6	687782			P69451	Fatty-acid-CoA ligase (tetradecanoate transport via vectoral Co-A coupling) (No2)	104.4	1083.24	419170
	P33317	dUTP diphosphatase (No2)	34560.2	91.08	173074			P37617	Copper (Cu+2) ABC transporter (periplasm) (No1)	1.026e+06	3090.96	101470
	P0CX11	enolase (No1)	828020	4054.68	642824			P37617	Cobalt (Co+2) ABC transporter (periplasm) (No1)	1.026e+06	3090.96	101470
	P00924	enolase (No2)	828000	4054.68	642824			P37617	Nickle (Ni+2) ABC transporter (periplasm) (No1)	1.026e+06	3090.96	101470
	P00925	enolase (No3)	255598	4054.68	642824			Q47690	Homocysteine Methyltransferase (No1)	1368.01	165.24	349714
	P42222	enolase (No4)	828020	4054.68	642824			P25437	Formaldehyde dehydrogenase (No1)	1.59515e+06	982.08	377380
	P0CX10	enolase (No5)	828020	4054.68	642824			P33360	Glycine betaine transport via ABC system (periplasm) (No1)	1.026e+06	870.12	344269
	Q03764	ethanolamine kinase (No1)	46440.3	1735.92	58622.8			P0AFL6	Inorganic triphosphatase (No1)	39599.3	91.44	330909
	P20485	ethanolamine kinase (No2)	195806	718.2	524172			P46859	Gluconokinase (No1)	34199.7	54	1.75525e+06
	P41734	ethyl acetate-hydrolyzing esterase (No1)	871.232	48.24	590585			P39208	Gluconokinase (No2)	34199.7	54	1.75525e+06
	Q12051	farnesyltranstransferase (No1)	11880	39.6	420337			P06983	Hydroxymethylbilane synthase (No1)	225.002	113.76	129512
	P39518	fatty-acid--CoA ligase (decanoate) (No1)	104.4	351	366301			P37617	Zinc (Zn+2) ABC transporter, efflux (periplasm) (No1)	1.026e+06	3090.96	101470
	P39518	fatty-acid--CoA ligase (dodecanoate) (No1)	104.4	1083.24	419170			P06986	Histidinol-phosphate transaminase (No1)	1.116e+07	371.52	622392
	P39518	fatty-acid--CoA ligase (hexadecanoate) (No1)	104.4	1083.24	419170			P04968	L-threonine deaminase (No1)	2.19563e+09	1814.4	374299
	P39518	fatty-acid--CoA ligase (octanoate) (No1)	104.4	351	366301			P0AGF6	L-threonine deaminase (No2)	37800	1814.4	374299
	P39518	fatty-acid--CoA ligase (tetradecanoate) (No1)	104.4	1083.24	419170			P18133	Nicotinic acid mononucleotide pyrophosphorylase (No1)	1296.01	55082.9	55082.9
	P00163	ubiquinol:ferricytochrome c reductase (No1)	395993	43.2	1.20005e+06			P00452	Ribonucleoside-diphosphate reductase (GDP) (No1)	46440.3	410.04	332325
	P07143	ubiquinol:ferricytochrome c reductase (No1)	395993	43.2	1.20005e+06			P69924	Ribonucleoside-diphosphate reductase (GDP) (No1)	46440.3	410.04	332325
	P08067	ubiquinol:ferricytochrome c reductase (No1)	395993	43.2	1.20005e+06			P00452	Ribonucleoside-diphosphate reductase (GDP) (No2)	46440.3	410.04	332325
	P38913	FMN adenylyltransferase (No1)	2.9808	18	823100			P69924	Ribonucleoside-diphosphate reductase (GDP) (No2)	46440.3	410.04	332325
	Q07923	FMN reductase (No1)	67681.9	83.88	3.99598e+06			P0ABQ4	Dihydrofolate reductase (No2)	89277.7	57.96	1.95599e+06
	P32771	formaldehyde dehydrogenase (No1)	4608.08	982.08	377380			P00909	Phosphoribosylanthranilate isomerase (irreversible) (No1)	179999	1099.8	908490
	Q08911	formate dehydrogenase (No1)	111600	105.12	73023.8			P04693	Tyrosine transaminase (No1)	1.79999e+06	812.88	1.31692e+06
	P09201	fructose-bisphosphatase (No1)	250922	993.6	982597			P00509	Tyrosine transaminase (No2)	432003	847.08	1.45623e+06
	P14540	fructose-bisphosphate aldolase (No1)	117000	62.64	203702			P0AB80	Tyrosine transaminase (No3)	7920.16	621.36	4.94084e+06
	P28272	dihydoorotic acid dehydrogenase (No1)	30599.8	2632.68	562808			P75823	L-allo-Threonine Aldolase (No2)	12780	744.12	308651
	P04385	galactokinase (No1)	80282.6	189	402978			P0A9B2	Erythrose 4-phosphate dehydrogenase (No2)	251997	1113.12	734802
	P08431	galactose-1-phosphate uridylyltransferase (No1)	129601	689.76	2.31752e+06			P0A9P0	Pyruvate dehydrogenase (No1)	136441	1249.56	1.34705e+06
	P32477	gamma-glutamylcysteine synthetase (No1)	3.66838e+07	1802.16	216156			P06959	Pyruvate dehydrogenase (No1)	136441	656.28	1.43913e+06
	P08524	geranyltranstransferase (No1)	3959.93	147.24	23420.2			P0AFG8	Pyruvate dehydrogenase (No1)	136441	961.92	844602
	P11412	glucose 6-phosphate dehydrogenase (No1)	2.27806e+06	430.92	410515			P69441	Deoxyadenylate kinase (No1)	1.17e+06	46.8	2.01938e+06
	P32264	glutamate 5-kinase (No1)	41454.2	1896.48	604792			P06968	DUTP diphosphatase (No1)	209881	91.08	173074
	P33327	glutamate dehydrogenase (NAD) (No1)	86400.6	48.24	183039			P52006	DUTP diphosphatase (No2)	5.37115e+06	48.6	687782
	P39708	glutamate dehydrogenase (NADP) (No1)	191986	1329.84	551246			P0A9J4	2-dehydropantoate 2-reductase (No1)	90000.9	174.24	885548
	P07262	glutamate dehydrogenase (NADP) (No2)	191986	1329.84	551246			P45563	Purine-nucleoside phosphorylase (Deoxyguanosine) (No1)	377644	159.12	2.58218e+06
	Q12680	glutamate synthase (NADH2) (No1)	251997	6064.56	331411			P0ABP8	Purine-nucleoside phosphorylase (Deoxyguanosine) (No2)	377644	159.12	2.58218e+06
	P54885	glutamate-5-semialdehyde dehydrogenase (No1)	319785	1581.12	395923			P12995	Adenosylmethionine-8-amino-7-oxononanoate transaminase (No1)	2880.02	1481.76	209700
	P43544	glutaminase (No1)	2.24962e+07	193.68	425870			P0A9C5	Glutamine synthetase (No1)	10800	4498.56	1.09903e+07
	P53823	glutaminase (No2)	2.24962e+07	193.68	425870			P04425	Glutathione synthetase (No1)	198000	130.68	238066
	P32288	glutamine synthetase (No1)	189721	4498.56	1.09903e+07			P0AEW4	3',5'-cyclic-nucleotide phosphodiesterase (No2)	3.45602	142.92	454879
	A2P2R3	glutamine-fructose-6-phosphate transaminase (No1)	127800	130.32	59872.3			Q46851	Aldose reductase (methylglyoxal) (No4)	291596	73.8	836265
	P14742	glutamine-fructose-6-phosphate transaminase (No2)	127800	130.32	59872.3			P00490	Maltodextrin phosphorylase (maltopentaose) (No1)	181798	424.8	180121
	P13188	glutaminyl-tRNA synthetase (No1)	11519.9	753.12	246849			P37617	Cadmium (Cd+2) ABC transporter (periplasm) (No1)	1.026e+06	3090.96	101470
	P46655	glutamyl-tRNA synthetase (No1)	5004	324.36	197268			P69441	Adenosine kinase (No1)	1.17e+06	46.8	2.01938e+06
	P48525	glutamyl-tRNA synthetase (No1)	5004	324.36	197268			P0A836	Succinyl-CoA synthetase (ADP-forming) (No1)	161028	121.32	1.05547e+06
	Q08220	glutathione synthetase (No1)	46799	130.68	238066			P0AGE9	Succinyl-CoA synthetase (ADP-forming) (No1)	161028	121.32	1.05547e+06
	P00359	glyceraldehyde-3-phosphate dehydrogenase (No1)	32760	1113.12	734802			P39286	Nucleoside-triphosphatase (ATP) (No2)	61919.5	6936.12	6936.12
	P00360	glyceraldehyde-3-phosphate dehydrogenase (No2)	104400	1113.12	734802			P0A6T3	Galactokinase (No1)	525597	189	402978
	P00358	glyceraldehyde-3-phosphate dehydrogenase (No3)	60120	1113.12	734802			P06987	Histidinol-phosphatase (No1)	7.70416e+06	3128.4	115692
	P14065	glycerol dehydrogenase (NADP-dependent) (No1)	1846.8	219.6	506571			Q46822	Isopentenyl-diphosphate D-isomerase (No1)	64441.3	14.76	725593
	P32190	glycerol kinase (No1)	6.01214e+06	303.84	531220			P0AEA8	Uroporphyrinogen methyltransferase (No1)	136801	78.84	124571
	P40106	glycerol-3-phosphatase (No1)	40176.8	199.8	9.63003e+06			P69451	Fatty-acid-CoA ligase (octadecenoate transport via vectoral Co-A coupling) (No1)	104.4	1083.24	419170
	P41277	glycerol-3-phosphatase (No2)	40176.8	199.8	9.63003e+06			P38135	Fatty-acid-CoA ligase (octadecenoate transport via vectoral Co-A coupling) (No2)	104.4	462.6	910174
	P32191	glycerol-3-phosphate dehydrogenase (fad) (No1)	119880	1254.96	531567			P0ABG1	CDP-diacylglycerol synthetase (n-C16:0) (No1)	32112	151.92	1.61466e+06
	Q00055	glycerol-3-phosphate dehydrogenase (NAD) (No1)	406802	507.96	533315			P0ABG1	CDP-diacylglycerol synthetase (n-C16:1) (No1)	32112	151.92	1.61466e+06
	P41911	glycerol-3-phosphate dehydrogenase (NAD) (No2)	406802	507.96	533315			P0ABG1	CDP-diacylglycerol synthetase (n-C18:1) (No1)	32112	151.92	1.61466e+06
	P41911	glycerol-3-phosphate dehydrogenase (NAD) (No1)	406802	507.96	533315			P0ABF8	Phosphatidylglycerol synthase (n-C18:0) (No1)	263999	1131.12	807988
	Q02979	glycerophosphodiester phosphodiesterase (glycerophosphocholine) (No1)	792016	379.08	221783			P0A9T0	Phosphoglycerate dehydrogenase (No1)	48600.3	262.8	90260.6
	P04161	glycinamide ribotide transformylase (No1)	27000	50.76	476293			P38135	Fatty-acid-CoA ligase (tetradecenoate transport via vectoral Co-A coupling) (No1)	104.4	462.6	910174
	P09624	glycine cleavage system (No1)	5.91786e+06	1249.56	1.34705e+06			P69451	Fatty-acid-CoA ligase (tetradecenoate transport via vectoral Co-A coupling) (No2)	104.4	1083.24	419170
	P48015	glycine cleavage system (No1)	5.91786e+06	1190.52	338668			P69451	Fatty-acid-CoA ligase (hexadecenoate transport via vectoral Co-A coupling) (No1)	104.4	1083.24	419170
	P49095	glycine cleavage system (No1)	5.91786e+06	1108.44	460476			P38135	Fatty-acid-CoA ligase (hexadecenoate transport via vectoral Co-A coupling) (No2)	104.4	462.6	910174
	P09624	glycine-cleavage complex (lipoamide) (No1)	2.33639e+06	1049.04	2.57172e+06			P0AB89	Adenylsuccinate lyase (No1)	197640	316.08	177656
	P48015	glycine-cleavage complex (lipoamide) (No1)	2.33639e+06	282.96	9648.36			P00926	D-serine deaminase (No1)	56519.5	204.84	186657
	P49095	glycine-cleavage complex (lipoamide) (No1)	2.33639e+06	510.12	6209.64			P0A796	Phosphofructokinase (No1)	223199	2590.56	279583
	P09624	glycine-cleavage complex (lipoamide) (No1)	3.23635e+06	1249.56	1.34705e+06			P06999	Phosphofructokinase (No2)	223199	2590.56	279583
	P48015	glycine-cleavage complex (lipoamide) (No1)	3.23635e+06	1190.52	338668			P0AFI7	Pyridoxine 5'-phosphate oxidase (No1)	2735.98	171.72	6.47041e+06
	P49095	glycine-cleavage complex (lipoamide) (No1)	3.23635e+06	1108.44	460476			P0A887	2-Octaprenyl-6-methoxy-benzoquinol methylase (No1)	7920.16	269.64	220126
	P09624	glycine-cleavage complex (lipoamide) (No2)	100080	1249.56	1.34705e+06			P62707	Phosphoglycerate mutase (No1)	418866	117.36	1.41881e+06
	P19262	glycine-cleavage complex (lipoamide) (No2)	100080	188.64	541269			P0A858	Triose-phosphate isomerase (No1)	2.62798e+06	7579.44	7.58721e+06
	P20967	glycine-cleavage complex (lipoamide) (No2)	100080	129.24	74013.1			P0A7A7	Glycerol-3-phosphate acyltransferase (C14:1) (No1)	35904.1	747.72	166428
	P09624	glycine-cleavage complex (lipoylprotein) (No1)	5.91786e+06	641.88	9746.64			P0A7A7	Glycerol-3-phosphate acyltransferase (C18:1) (No1)	35904.1	747.72	166428
	P48015	glycine-cleavage complex (lipoylprotein) (No1)	5.91786e+06	282.96	9648.36			P0ABG1	CDP-diacylglycerol synthetase (n-C14:0) (No1)	32112	151.92	1.61466e+06
	P49095	glycine-cleavage complex (lipoylprotein) (No1)	5.91786e+06	510.12	6209.64			P0ABG1	CDP-diacylglycerol synthetase (n-C18:0) (No1)	32112	151.92	1.61466e+06
	P09624	glycine-cleavage complex (lipoylprotein) (No1)	5.91786e+06	1249.56	1.34705e+06			P0ABG1	CDP-diacylglycerol synthetase (n-C14:1) (No1)	32112	151.92	1.61466e+06
	P48015	glycine-cleavage complex (lipoylprotein) (No1)	5.91786e+06	1190.52	338668			P0ABF8	Phosphatidylglycerol synthase (n-C14:1) (No1)	263999	1131.12	807988
	P49095	glycine-cleavage complex (lipoylprotein) (No1)	5.91786e+06	1108.44	460476			P40191	Pyridoxamine kinase (No1)	2519.97	462.24	739304
	P09624	glycine-cleavage system (lipoamide) (No1)	5.91786e+06	1827.72	501382			P07014	Succinate dehydrogenase (irreversible) (No1)	601214	140.4	168407
	P48015	glycine-cleavage system (lipoamide) (No1)	5.91786e+06	1622.88	480801			P0AC41	Succinate dehydrogenase (irreversible) (No1)	601214	140.4	168407
	P49095	glycine-cleavage system (lipoamide) (No1)	5.91786e+06	1607.04	642945			P22106	Asparagine synthase (glutamine-hydrolysing) (No1)	21888.1	1391.04	368173
	P06738	glycogen phosphorylase (No1)	181798	424.8	180121			P0A7A7	Glycerol-3-phosphate acyltransferase (C14:0) (No1)	35904.1	747.72	166428
	P38088	glycyl-tRNA synthetase (No1)	2627.98	1556.64	75953.2			P0A7A7	Glycerol-3-phosphate acyltransferase (C16:0) (No1)	35904.1	747.72	166428
	Q06817	glycyl-tRNA synthetase (No2)	57240	1556.64	75953.2			P0A7A7	Glycerol-3-phosphate acyltransferase (C16:1) (No1)	35904.1	747.72	166428
	P38625	GMP synthase (No1)	1548.01	2766.24	196527			P0ABF8	Phosphatidylglycerol synthase (n-C16:0) (No1)	263999	1131.12	807988
	P47088	GPI-anchor assembly, step 5 (No1)	255239	24.84	215839			P0ABF8	Phosphatidylglycerol synthase (n-C16:1) (No1)	263999	1131.12	807988
	P38211	GPI-anchor assembly, step 7 (No1)	255239	56.52	725988			P0ABF8	Phosphatidylglycerol synthase (n-C14:0) (No1)	263999	1131.12	807988
	P30777	GPI-anchor assembly, step 8 (No1)	255239	89.64	4.75123e+06			P0ABF8	Phosphatidylglycerol synthase (n-C18:1) (No1)	263999	1131.12	807988
	P51601	GTP cyclohydrolase I (No1)	140.4	16.92	190011			P0A7A7	Glycerol-3-phosphate acyltransferase (C18:0) (No1)	35904.1	747.72	166428
	P38066	GTP cyclohydrolase II (No1)	1.55521e+06	114.12	632172			P0ABG1	CDP-diacylglycerol synthetase (n-C12:0) (No1)	32112	151.92	1.61466e+06
	P15454	guanylate kinase (No1)	1.4184e+06	331.92	2.52285e+06			P0A7A7	Glycerol-3-phosphate acyltransferase (C12:0) (No1)	35904.1	747.72	166428
	P15454	guanylate kinase (GMP:dATP) (No1)	1.4184e+06	331.92	2.52285e+06			P0ABF8	Phosphatidylglycerol synthase (n-C12:0) (No1)	263999	1131.12	807988
	P48360	heme O monooxygenase (No2)	92157.4	318.96	737060			P0A887	S-adenosylmethione:2-demthylmenaquinole methyltransferase (menaquinone 8) (No1)	7920.16	269.64	220126
	P21592	Heme O synthase (No1)	11880	39.6	420337			P75823	Threonine aldolase (No2)	6732.19	744.12	308651
	P27697	hexaprenyldihydroxybenzoate methyltransferase (No1)	25199.7	576.36	313474			P32176	Formate dehydrogenase (quinone-8) (periplasm) (No1)	3.94914e+06	105.12	73023.8
	P41735	hexaprenyldihydroxybenzoate methyltransferase (No1)	25199.7	85.68	360732			P32176	Formate Dehydrogenase (menaquinone-8) (periplasm) (No2)	3.94914e+06	105.12	73023.8
	P49017	hexaprenyldihydroxybenzoate methyltransferase (No1)	25199.7	269.64	220126			P12996	Biotin synthase (No1)	50040	22.68	372696
	P53318	hexaprenyldihydroxybenzoate methyltransferase (No1)	25199.7	327.24	199898			P60716	Lipoate synthase (No1)	935979	155.88	198648
	Q06204	hexokinase (D-fructose:ATP) (No1)	224281	82.44	438702			P32099	Lipoate-ATP adenylate transferase (No1)	478.79	238.68	493384
	P04806	hexokinase (D-fructose:ATP) (No2)	986388	312.48	255304			P21599	Pyruvate kinase(4) (No1)	1.15344e+07	3752.28	709041
	P04807	hexokinase (D-fructose:ATP) (No3)	456121	312.48	255304			P0A9B2	NADH hydratase (No1)	264957	3690	747866
	Q06204	hexokinase (D-glucose:ATP) (No1)	6012.14	82.44	438702			P0A8N5	Ap4A synthetase (No1)	6119.95	38.16	354703
	P17709	hexokinase (D-glucose:ATP) (No2)	986388	260.28	116315			P77256	Aldose reductase (methylglyoxal) (nadh) (No1)	2.62798e+06	71.64	1.52942e+06
	P04806	hexokinase (D-glucose:ATP) (No3)	986388	312.48	255304			P21599	Pyruvate kinase(2) (No1)	1.15344e+07	3752.28	709041
	P04807	hexokinase (D-glucose:ATP) (No4)	456121	312.48	255304			P21599	Pyruvate kinase(3) (No1)	1.15344e+07	3752.28	709041
	Q06204	hexokinase (D-mannose:ATP) (No1)	224281	82.44	438702			P21599	RE2954 (No1)	1.15344e+07	3752.28	709041
	P04806	hexokinase (D-mannose:ATP) (No2)	986388	312.48	255304			P0A9T0	(R)-alpha-hydroxyglutarate dehydrogenase (No1)	530645	262.8	90260.6
	P04807	hexokinase (D-mannose:ATP) (No3)	456121	312.48	255304			P00509	Cysteine transaminase (No1)	432003	847.08	1.45623e+06
	P38635	histidinol-phosphatase (No1)	7.70416e+06	664.2	728921			P00547	4-Hydroxy-L-threonine kinase (No1)	146880	242.64	223259
	P07172	histidinol-phosphate transaminase (No1)	1.116e+07	371.52	622392			P09546	Proline dehydrogenase (q8) (No1)	104400	298.44	784389
	P07263	histidyl-tRNA synthetase (No1)	144001	2903.04	474709			P76083	3-hydroxyadipyl-CoA dehydrogenase (NAD+) (No1)	1.0368e+06	91.08	181107
	P07263	histidyl-tRNA synthetase (No1)	144001	2903.04	474709			P32099	Octanoate non-lipoylated apo domain ligase (No1)	478.79	238.68	493384
	P38074	hnRNP arginine N-methyltransferase (No1)	25199.7	76.32	531351			P69441	Nucleoside-diphosphate kinase (ATP:dGDP) (reversible) (No1)	2.81881e+06	60.12	2.71798e+06
	P39533	homoacontinate hydratase (No1)	2700	19571.8	7.56743e+06			P0A763	Nucleoside-diphosphate kinase (ATP:dGDP) (reversible) (No2)	950390	102.24	1.90718e+06
	P49367	homoacontinate hydratase (No2)	9000.09	3987	9.40564e+06			P69441	Nucleoside-diphosphate kinase (ATP:dUDP) (reversible) (No1)	2.81881e+06	60.12	2.71798e+06
	P48570	homocitrate synthase (No1)	2221.19	471.96	122947			P0A763	Nucleoside-diphosphate kinase (ATP:dUDP) (reversible) (No2)	950390	102.24	1.90718e+06
	Q12525	homocysteine S-methyltransferase (No1)	1368.01	165.24	349714			P69441	Nucleoside-diphosphate kinase (ATP:dADP) (reversible) (No1)	2.81881e+06	60.12	2.71798e+06
	Q08985	homocysteine S-methyltransferase (No2)	1368.01	165.24	349714			P0A763	Nucleoside-diphosphate kinase (ATP:dADP) (reversible) (No2)	950390	102.24	1.90718e+06
	P40495	homoisocitrate dehydrogenase (No1)	61199.5	81.72	42508.1			P05020	Dihydroorotase (reversible) (No1)	8927.77	687.96	8.2102e+06
	P31116	homoserine dehydrogenase (NADH) (No1)	81287.6	434.88	2.03913e+06			P08200	Isocitrate dehydrogenase (NADP) (reversible) (No1)	383039	25172.3	25172.3
	P31116	homoserine dehydrogenase (NADP) (No1)	81287.6	434.88	2.03913e+06			P0A9Q7	Acetaldehyde dehydrogenase (acetylating) (reversible) (No2)	5.92557e+06	3080.16	4.37009e+06
	P17423	homoserine kinase (No1)	146880	242.64	223259			P0A959	L-alanine transaminase (reversible) (No1)	11016	1129.68	1.78399e+06
	P08465	homoserine O-trans-acetylase (No1)	34560.2	691.92	535884			P77434	L-alanine transaminase (reversible) (No2)	11016	1129.68	1.78399e+06
	Q04120	hydrogen peroxide reductase (thioredoxin) (No1)	3.44519e+06	406.44	8.70449e+07			P00509	Aspartate transaminase (reversible) (No1)	2.41202e+06	668.16	656961
	Q04120	hydrogen peroxide reductase (thioredoxin) (No2)	3.44519e+06	406.44	8.70449e+07			P0AB80	Isoleucine transaminase (reversible) (No1)	539986	444.6	764180
	P38013	hydrogen peroxide reductase (thioredoxin) (No1)	3.44519e+06	406.44	8.70449e+07			P0A7E3	Orotate phosphoribosyltransferase (reversible) (No1)	11519.9	53.28	327632
	P38013	hydrogen peroxide reductase (thioredoxin) (No2)	3.44519e+06	406.44	8.70449e+07			P0A6P9	Enolase (reversible) (No1)	55691.7	3639.6	272962
	P32378	hydroxybenzoate octaprenyltransferase (No1)	27.3082	4.32	2.01857e+06			P0AB71	Fructose-bisphosphate aldolase (reversible) (No1)	7.19994	164.52	93249.4
	P28789	hydroxymethylbilane synthase (No1)	225.002	113.76	129512			P0A991	Fructose-bisphosphate aldolase (reversible) (No2)	7.19994	164.52	93249.4
	P33734	Imidazole-glycerol-3-phosphate synthase (No1)	496796	9023.4	553746			P61517	HCO3 equilibration reaction (reversible) (No1)	1.58401e+10	30.6	1.57587e+09
	P06633	imidazoleglycerol-phosphate dehydratase (No1)	3.59997e+06	175.32	1.37572e+06			P0ABE9	HCO3 equilibration reaction (reversible) (No2)	1.58401e+10	30.6	1.57587e+09
	P38697	IMP dehydrogenase (No1)	8855.83	148.32	124711			P0A799	Phosphoglycerate kinase (reversible) (No1)	9.47867e+06	7379.28	427850
	P50095	IMP dehydrogenase (No2)	8855.83	148.32	124711			P0AG07	Ribulose 5-phosphate 3-epimerase (reversible) (No1)	4.6799e+06	2583.36	1.31976e+08
	P50094	IMP dehydrogenase (No3)	8855.83	148.32	124711			P0A870	Transaldolase (reversible) (No1)	82440.2	278.28	234027
	P26263	indole-3-pyruvate decarboxylase (No1)	223199	76.68	236647			P0A867	Transaldolase (reversible) (No2)	82440.2	278.28	234027
	P06169	indole-3-pyruvate decarboxylase (No2)	522000	76.68	236647			P0ABP8	Purine-nucleoside phosphorylase (Adenosine) (reversible) (No1)	432003	444.96	1.58368e+06
	P16467	indole-3-pyruvate decarboxylase (No3)	223199	76.68	236647			P45563	Purine-nucleoside phosphorylase (Guanosine) (reversible) (No1)	568796	444.96	1.58368e+06
	P00817	inorganic diphosphatase (No1)	935979	71.28	2.9202e+06			P0ABP8	Purine-nucleoside phosphorylase (Guanosine) (reversible) (No2)	568796	444.96	1.58368e+06
	P28239	inorganic diphosphatase (No1)	935979	71.28	2.9202e+06			P45563	Purine-nucleoside phosphorylase (Inosine) (reversible) (No1)	457206	444.96	1.58368e+06
	Q06667	inositol-1,3,4,5,6-pentakisphosphate 2-kinase (No1)	2642.43	60.12	4.64308e+07			P0ABP8	Purine-nucleoside phosphorylase (Inosine) (reversible) (No2)	457206	444.96	1.58368e+06
	P40015	IPS phospholipase C (No1)	75597.2	109.44	265716			P45563	Purine-nucleoside phosphorylase (Xanthosine) (reversible) (No1)	432003	444.96	1.58368e+06
	P40015	IPS phospholipase C (No1)	75597.2	115.92	283698			P0A9Q7	Alcohol dehydrogenase (ethanol) (reversible) (No1)	56519.5	3080.16	4.37009e+06
	P40015	IPS phospholipase C (No1)	75597.2	104.76	272558			P39451	Alcohol dehydrogenase (ethanol) (reversible) (No2)	5.92557e+06	3080.16	4.37009e+06
	P40015	IPS phospholipase C (No1)	75597.2	104.76	269740			P0A6A6	3-isopropylmalate dehydratase (reversible) (No1)	2.86738e+08	936.36	1.06364e+06
	P40015	IPS phospholipase C (No1)	75597.2	121.32	291765			P30126	3-isopropylmalate dehydratase (reversible) (No1)	2.86738e+08	936.36	1.06364e+06
	P40015	IPS phospholipase C (No1)	75597.2	120.6	288127			P69441	Adentylate kinase (ITP) (reversible) (No1)	2.81881e+06	60.12	2.71798e+06
	P40015	IPS phospholipase C (No1)	75597.2	109.8	277941			P61889	Malate dehydrogenase (reversible) (No1)	3.35166e+06	2909.52	1.67406e+07
	P40015	IPS phospholipase C (No1)	75597.2	109.44	274908			P0AC33	Fumarase (reversible) (No1)	2.23199e+06	624.6	200577
	P40015	IPS phospholipase C (No1)	75597.2	121.32	294519			P14407	Fumarase (reversible) (No2)	2.23199e+06	624.6	200577
	P40015	IPS phospholipase C (No1)	75597.2	113.76	270121			P05042	Fumarase (reversible) (No3)	2.23199e+06	624.6	200577
	P40015	IPS phospholipase C (No1)	75597.2	131.4	293044			P0A825	Glycine hydroxymethyltransferase, reversible (reversible) (No1)	17999.9	97.2	258291
	P40015	IPS phospholipase C (No1)	75597.2	131.4	304437			P39451	Alcohol dehydrogenase (glycerol) (reversible) (No1)	1.59515e+06	5751	1.52619e+06
	P40015	IPS phospholipase C (No1)	75597.2	133.2	300049			P0A9Q7	Alcohol dehydrogenase (glycerol) (reversible) (No2)	1.59515e+06	5751	1.52619e+06
	P40015	IPS phospholipase C (No1)	75597.2	136.08	299521			P69441	Nucleoside-diphosphate kinase (ATP:dCDP) (reversible) (No1)	2.81881e+06	60.12	2.71798e+06
	P40015	IPS phospholipase C (No1)	75597.2	140.4	228751			P0A763	Nucleoside-diphosphate kinase (ATP:dCDP) (reversible) (No2)	950390	102.24	1.90718e+06
	P40015	IPS phospholipase C (No1)	75597.2	138.6	227538			P69441	Adenylate kinase (reversible) (No1)	1.4094e+06	60.12	2.71798e+06
	P40015	IPS phospholipase C (No1)	75597.2	143.28	257642			P69441	Nucleoside-diphosphate kinase (ATP:UDP) (reversible) (No1)	2.81881e+06	60.12	2.71798e+06
	P40015	IPS phospholipase C (No1)	75597.2	131.76	234167			P0A763	Nucleoside-diphosphate kinase (ATP:UDP) (reversible) (No2)	950390	102.24	1.90718e+06
	P40015	IPS phospholipase C (No1)	75597.2	157.68	255055			P0A763	Nucleoside-diphosphate kinase (ATP:CDP) (reversible) (No1)	824402	102.24	1.90718e+06
	P40015	IPS phospholipase C (No1)	75597.2	154.8	252711			P69441	Nucleoside-diphosphate kinase (ATP:CDP) (reversible) (No2)	2.81881e+06	60.12	2.71798e+06
	P40015	IPS phospholipase C (No1)	75597.2	150.48	263471			P69441	Nucleoside-diphosphate kinase (ATP:dTDP) (reversible) (No1)	2.81881e+06	60.12	2.71798e+06
	P40015	IPS phospholipase C (No1)	75597.2	157.32	258213			P0A763	Nucleoside-diphosphate kinase (ATP:dTDP) (reversible) (No2)	950390	102.24	1.90718e+06
	P40015	IPS phospholipase C (No1)	75597.2	154.44	255754			P60546	Deoxyguanylate kinase (dGMP:ATP) (reversible) (No1)	752389	471.6	2.39113e+06
	P40015	IPS phospholipase C (No1)	75597.2	109.44	265716			P69441	Nucleoside-diphosphate kinase (ATP:GDP) (reversible) (No1)	2.81881e+06	60.12	2.71798e+06
	P40015	IPS phospholipase C (No1)	75597.2	115.92	283698			P0A763	Nucleoside-diphosphate kinase (ATP:GDP) (reversible) (No2)	177841	102.24	1.90718e+06
	P40015	IPS phospholipase C (No1)	75597.2	104.76	272558			P0A9Q9	Aspartate-semialdehyde dehydrogenase (reversible) (No1)	674263	1175.04	887268
	P40015	IPS phospholipase C (No1)	75597.2	104.76	269740			P18335	Acetylornithine transaminase (reversible) (No2)	26223.3	3741.84	243410
	P40015	IPS phospholipase C (No1)	75597.2	121.32	291765			P0A9B2	Glyceraldehyde-3-phosphate dehydrogenase (reversible) (No1)	264957	3690	747866
	P40015	IPS phospholipase C (No1)	75597.2	120.6	288127			P0AB71	Sedoheptulose 1,7-bisphosphate D-glyceraldehyde-3-phosphate-lyase (reversible) (No1)	7.19994	164.52	93249.4
	P40015	IPS phospholipase C (No1)	75597.2	109.8	277941			P69441	Adentylate kinase (GTP) (reversible) (No1)	2.81881e+06	60.12	2.71798e+06
	P40015	IPS phospholipase C (No1)	75597.2	109.44	274908			P76503	Acetyl-CoA C-acyltransferase (hexanoyl-CoA) (r) (reversible) (No1)	30779.6	32.04	395986
	P40015	IPS phospholipase C (No1)	75597.2	121.32	294519			P21151	Acetyl-CoA C-acyltransferase (hexanoyl-CoA) (r) (reversible) (No2)	30779.6	32.04	395986
	P40015	IPS phospholipase C (No1)	75597.2	113.76	270121			P00562	Homoserine dehydrogenase (NADPH) (reversible) (No1)	81287.6	434.88	2.03913e+06
	P40015	IPS phospholipase C (No1)	75597.2	131.4	293044			P00561	Homoserine dehydrogenase (NADPH) (reversible) (No2)	81287.6	434.88	2.03913e+06
	P40015	IPS phospholipase C (No1)	75597.2	131.4	304437			P0ABB0	ATP synthase (four protons for one ATP) (periplasm) (reversible) (No1)	1.026e+06	1021.68	93094.9
	P40015	IPS phospholipase C (No1)	75597.2	133.2	300049			P0ABB4	ATP synthase (four protons for one ATP) (periplasm) (reversible) (No1)	1.026e+06	1021.68	93094.9
	P40015	IPS phospholipase C (No1)	75597.2	136.08	299521			P0ABB0	ATP synthase (four protons for one ATP) (periplasm) (reversible) (No2)	1.026e+06	1021.68	93094.9
	P40015	IPS phospholipase C (No1)	75597.2	140.4	228751			P0ABB4	ATP synthase (four protons for one ATP) (periplasm) (reversible) (No2)	1.026e+06	1021.68	93094.9
	P40015	IPS phospholipase C (No1)	75597.2	138.6	227538			P60546	Guanylate kinase (GMP:ATP) (reversible) (No1)	752389	188.64	1.43924e+06
	P40015	IPS phospholipase C (No1)	75597.2	143.28	257642			P76503	Acetyl-CoA C-acyltransferase (dodecanoyl-CoA) (r) (reversible) (No1)	30779.6	80.28	374711
	P40015	IPS phospholipase C (No1)	75597.2	131.76	234167			P21151	Acetyl-CoA C-acyltransferase (dodecanoyl-CoA) (r) (reversible) (No2)	30779.6	80.28	374711
	P40015	IPS phospholipase C (No1)	75597.2	157.68	255055			P25437	Formaldehyde dehydrogenase (reversible) (No1)	5.92557e+06	614.16	1.08019e+06
	P40015	IPS phospholipase C (No1)	75597.2	154.8	252711			P00370	Glutamate dehydrogenase (NADP) (reversible) (No1)	1.0314e+08	1329.84	551246
	P40015	IPS phospholipase C (No1)	75597.2	150.48	263471			P04693	Tyrosine transaminase (reversible) (No1)	4.32003e+06	1442.16	592172
	P40015	IPS phospholipase C (No1)	75597.2	157.32	258213			P00509	Tyrosine transaminase (reversible) (No2)	2.41202e+06	779.04	372649
	P40015	IPS phospholipase C (No1)	75597.2	154.44	255754			P0A9B2	Erythrose 4-phosphate dehydrogenase (reversible) (No2)	264957	3690	747866
	P41734	isoamyl acetate-hydrolyzing esterase (No1)	3.52435e+06	38.88	333508			P69441	Deoxyadenylate kinase (reversible) (No1)	2.81881e+06	60.12	2.71798e+06
	P41734	isobutyl acetate-hydrolyzing esterase (No1)	3.52435e+06	25.56	182366			P12995	Adenosylmethionine-8-amino-7-oxononanoate transaminase (reversible) (No1)	2880.02	3697.56	290315
	P28241	isocitrate dehydrogenase (NAD+) (No1)	108000	1812.6	610268			P0A836	Succinyl-CoA synthetase (ADP-forming) (reversible) (No1)	723589	29.52	1.75068e+06
	P28834	isocitrate dehydrogenase (NAD+) (No1)	108000	1812.6	610268			P0AGE9	Succinyl-CoA synthetase (ADP-forming) (reversible) (No1)	723589	29.52	1.75068e+06
	P41939	isocitrate dehydrogenase (NADP) (No1)	209881	1476	61041.6			Q46822	Isopentenyl-diphosphate D-isomerase (reversible) (No1)	64441.3	137.52	584052
	P53982	isocitrate dehydrogenase (NADP+), peroxisomal (No1)	209881	1476	61041.6			P0A7Z0	Ribose-5-phosphate isomerase (reversible) (No1)	1.42308e+08	100.44	1.39762e+06
	P28240	isocitrate lyase (No1)	47519.5	5425.56	1.70211e+06			P37351	Ribose-5-phosphate isomerase (reversible) (No2)	1.42308e+08	100.44	1.39762e+06
	P47176	isoleucine transaminase (No1)	3.86997e+06	621.36	4.94084e+06			P76083	3-hydroxyadipyl-CoA dehydrogenase (NAD+) (reversible) (No1)	2.62798e+06	71.64	1.52942e+06
	P38891	isoleucine transaminase (No1)	3.86997e+06	621.36	4.94084e+06
	P09436	isoleucyl-tRNA synthetase (No1)	289444	1911.6	147453
	P48526	isoleucyl-tRNA synthetase (No1)	289444	1911.6	147453
	P15496	isopentenyl-diphosphate D-isomerase (No1)	1.0764e+08	14.76	725593
	P53312	itaconate-CoA ligase (ADP-forming) (No1)	211681	121.32	1.05547e+06
	P53598	itaconate-CoA ligase (ADP-forming) (No1)	211681	121.32	1.05547e+06
	P07275	L-1-pyrroline-3-hydroxy-5-carboxylate dehydrogenase (No1)	5399.86	228.24	176972
	P07275	L-4-hydroxyglutamate semialdehyde dehydrogenase (No1)	5399.86	228.24	176972
	P52893	L-alanine transaminase (No1)	21924.1	1297.8	2.84281e+06
	P37303	L-allo-threonine aldolase (No1)	154801	744.12	308651
	P50113	L-aminoadipate-semialdehyde dehydrogenase (NADPH) (No1)	150121	79.92	1.42417e+06
	P23542	L-erythro-4-hydroxyglutamate:2-oxoglutarate aminotransferase (No1)	1.15921e+06	847.08	1.45623e+06
	Q01802	L-erythro-4-hydroxyglutamate:2-oxoglutarate aminotransferase (No1)	1.15921e+06	847.08	1.45623e+06
	P23542	L-erythro-4-hydroxyglutamate:2-oxoglutarate aminotransferase (No1)	1.15921e+06	847.08	1.45623e+06
	P32263	L-hydroxyproline reductase (NADP) (No1)	2.49838e+06	39.6	571383
	P38715	L-lactaldehyde:NADP+ 1-oxidoreductase (No1)	957579	90	521576
	P35497	L-sorbitol dehydrogenase (L-sorbose-producing) (No1)	579609	1940.04	550832
	P25379	L-threonine deaminase (No1)	37800	1814.4	374299
	P00927	L-threonine deaminase (No1)	1.0332e+06	1814.4	374299
	P50107	lactoylglutathione lyase (No1)	6.55179e+06	2242.8	2.04028e+07
	P47176	leucine transaminase (No1)	3.23279e+06	621.36	4.94084e+06
	P38891	leucine transaminase (No1)	3.23279e+06	621.36	4.94084e+06
	P26637	leucyl-tRNA synthetase (No1)	135000	948.24	320000
	P11325	leucyl-tRNA synthetase (No1)	135000	948.24	320000
	P15180	lysyl-tRNA synthetase (No1)	164520	38.16	354703
	P32048	lysyl-tRNA synthetase (No1)	164520	38.16	354703
	P17505	malate dehydrogenase (No1)	685448	7769.88	5.49662e+06
	P22133	malate dehydrogenase, cytoplasmic (No1)	64800.4	7769.88	5.49662e+06
	P32419	malate dehydrogenase, peroxisomal (No1)	64800.4	7769.88	5.49662e+06
	P21826	malate synthase (No1)	69118.1	842.4	223587
	P30952	malate synthase (No2)	69118.1	842.4	223587
	P30952	malate synthase (No1)	69118.1	842.4	223587
	P36013	malic enzyme (NAD) (No1)	482393	3220.2	291819
	P36013	malic enzyme (NADP) (No1)	482393	3323.16	291537
	P41940	mannose-1-phosphate guanylyltransferase (No1)	705219	2178.36	505034
	P19358	methionine adenosyltransferase (No1)	0.317884	3096	319963
	P10659	methionine adenosyltransferase (No2)	2098.8	3096	319963
	P05694	methionine synthase (No1)	12600	299.52	90495
	P32785	methionyl-tRNA formyltransferase (No1)	467.99	96.12	546843
	P00958	methionyl-tRNA synthetase (No1)	1475.99	680.4	290414
	P22438	methionyl-tRNA synthetase (No1)	1475.99	680.4	290414
	Q02046	methylenetetrahydrofolate dehydrogenase (NAD) (No1)	103680	38.88	627231
	P07277	mevalonate kinase (atp) (No1)	78839.5	969.48	1.43517e+06
	P07277	mevalonate kinase (ctp) (No1)	78839.5	504	2.08982e+06
	P07277	mevalonate kinase (gtp) (No1)	78839.5	467.28	937475
	P07277	mevalonate kinase (UTP) (No1)	78839.5	434.52	1.02913e+06
	P32377	mevalonate pyrophoshate decarboxylase (No1)	17640.1	135.36	184485
	P38287	MIPC synthase (No1)	334.795	178.92	277563
	P33300	MIPC synthase (No2)	255239	178.92	277563
	P38287	MIPC synthase (No1)	334.795	178.92	277563
	P33300	MIPC synthase (No2)	255239	178.92	277563
	P38287	MIPC synthase (No1)	334.795	178.92	277563
	P33300	MIPC synthase (No2)	255239	178.92	277563
	P38287	MIPC synthase (No1)	334.795	178.92	277563
	P33300	MIPC synthase (No2)	255239	178.92	277563
	P38287	MIPC synthase (No1)	334.795	178.92	277563
	P33300	MIPC synthase (No2)	255239	178.92	277563
	P38287	MIPC synthase (No1)	334.795	178.92	277563
	P33300	MIPC synthase (No2)	255239	178.92	277563
	P38287	MIPC synthase (No1)	334.795	178.92	277563
	P33300	MIPC synthase (No2)	255239	178.92	277563
	P38287	MIPC synthase (No1)	334.795	178.92	277563
	P33300	MIPC synthase (No2)	255239	178.92	277563
	P38287	MIPC synthase (No1)	334.795	178.92	277563
	P33300	MIPC synthase (No2)	255239	178.92	277563
	P21595	N-formyltyrosine oxidase (No1)	9252.41	210.96	557842
	P53164	NAD diphosphatase (No1)	9.00009	1.44	152707
	P32622	NAD kinase (No1)	3023.98	140.04	310976
	P21373	NAD kinase (No2)	9647.85	126.72	128541
	P32622	NAD kinase (No1)	3023.98	140.04	310976
	P21373	NAD kinase (No2)	9647.85	126.72	128541
	Q06892	NAD kinase (No3)	3023.98	140.04	310976
	P06700	NAD nucleosidase nuclear (No1)	579609	761.04	770728
	P53688	NAD nucleosidase nuclear (No2)	579609	761.04	770728
	P53685	NAD nucleosidase nuclear (No3)	579609	761.04	770728
	P53687	NAD nucleosidase nuclear (No4)	579609	761.04	770728
	P53686	NAD nucleosidase nuclear (No5)	579609	761.04	770728
	P38795	NAD synthase (No1)	23039.9	250.92	125208
	P38795	NAD synthase (No1)	23039.9	250.92	125208
	Q07500	NADH dehydrogenase, cytosolic/mitochondrial (No1)	1.79999e+06	430.56	744609
	P40215	NADH dehydrogenase, cytosolic/mitochondrial (No2)	1.79999e+06	430.56	744609
	P32622	NADH kinase (No1)	57960.9	105.84	744065
	P21373	NADH kinase (No2)	9647.85	78.84	319882
	P32622	NADH kinase mitochondrial (No1)	57960.9	105.84	744065
	P21373	NADH kinase mitochondrial (No2)	9647.85	78.84	319882
	Q06892	NADH kinase mitochondrial (No3)	57960.9	105.84	744065
	P32340	NADH:ubiquinone oxidoreductase (No1)	1.79999e+06	430.56	744609
	P39683	NAPRtase (No1)	900.009	74.88	721422
	P39683	NAPRtase (No1)	900.009	74.88	721422
	P53184	nicotinamidase (No1)	13680.1	6.48	253822
	Q05874	nicotinamide N-methyltransferase (No1)	25199.7	76.32	531351
	P25576	nicotinamide-nucleotide adenylyltransferase (No1)	8676.04	265.68	4122000
	Q06178	nicotinamide-nucleotide adenylyltransferase (No2)	8676.04	265.68	4122000
	P53204	nicotinamide-nucleotide adenylyltransferase (No1)	8676.04	265.68	4122000
	Q06178	nicotinamide-nucleotide adenylyltransferase (No2)	8676.04	265.68	4122000
	P53204	nicotinate-nucleotide adenylyltransferase (No1)	8676.04	265.68	4122000
	Q06178	nicotinate-nucleotide adenylyltransferase (No2)	8676.04	265.68	4122000
	P43619	nicotinate-nucleotide diphosphorylase (carboxylating) (No1)	21600.1	30.24	1.52395e+07
	P43619	nicotinate-nucleotide diphosphorylase (carboxylating) (No1)	21600.1	30.24	1.52395e+07
	P40009	nucleoside diphosphatase (No1)	278280	143.64	235886
	P40009	nucleoside diphosphatase (No1)	373315	78.48	157330
	P40009	nucleoside diphosphatase (No1)	291240	72	166325
	P32621	nucleoside diphosphatase (No1)	1.3788e+07	176.76	141969
	P40009	nucleoside diphosphatase (No1)	1.08684e+07	81.72	287895
	P36010	nucleoside diphosphate kinase (No1)	950390	51.48	1.36085e+06
	P36010	nucleoside diphosphate kinase (No1)	950390	51.48	1.36085e+06
	P36010	nucleoside diphosphate kinase (No1)	950390	124.56	2.22592e+06
	P36010	nucleoside diphosphate kinase (No1)	950390	124.56	2.22592e+06
	P36010	nucleoside diphosphate kinase (No1)	47879	124.56	2.22592e+06
	P36010	nucleoside diphosphate kinase (No1)	950390	124.56	2.22592e+06
	P36010	nucleoside diphosphate kinase (No1)	950390	51.48	1.36085e+06
	P36010	nucleoside diphosphate kinase (No1)	950390	51.48	1.36085e+06
	P36010	nucleoside diphosphate kinase (No1)	950390	124.56	2.22592e+06
	P39730	nucleoside triphosphatase (No1)	31679.7	190.8	89073.4
	P54861	nucleoside triphosphatase (No2)	11160	311.76	226453
	P40009	nucleoside triphosphatase (No3)	291240	100.8	177479
	P40009	nucleoside triphosphatase (No1)	372245	95.4	188821
	P40009	nucleoside triphosphatase (No1)	1.08684e+07	106.2	294071
	P40009	nucleoside triphosphatase (No1)	379075	161.28	184982
	P32621	nucleoside-diphosphatase (GDP), Golgi (No1)	1.3788e+07	195.84	134884
	P36010	nucleoside-diphosphate kinase (ATP:UDP) (No1)	950390	51.48	1.36085e+06
	Q04533	O-succinylhomoserine lyase (L-cysteine) (No2)	435597	2019.6	101164
	P31373	O-succinylhomoserine lyase (L-cysteine) (No3)	539.986	36.36	354058
	P05150	ornithine carbamoyltransferase (No1)	295203	1488.96	3.85111e+06
	P07991	ornithine transaminase (No1)	350459	1719	626932
	P13298	orotate phosphoribosyltransferase (No1)	4679.9	27.36	392899
	P30402	orotate phosphoribosyltransferase (No2)	4679.9	27.36	392899
	P03962	orotidine-5'-phosphate decarboxylase (No1)	2.052e+06	196.56	203295
	P09624	oxoglutarate dehydrogenase (lipoamide) (No1)	100080	1049.04	2.57172e+06
	P19262	oxoglutarate dehydrogenase (lipoamide) (No1)	100080	330.48	4.37495e+06
	P20967	oxoglutarate dehydrogenase (lipoamide) (No1)	100080	577.44	455506
	P53332	pantetheine-phosphate adenylyltransferase (No1)	17470.9	110.88	1.22874e+06
	Q04430	pantothenate kinase (No1)	7631.84	21.96	648279
	P15624	phenylalanyl-tRNA synthetase (No1)	2.1708e+06	546.12	1.15326e+06
	P15625	phenylalanyl-tRNA synthetase (No1)	2.1708e+06	546.12	1.15326e+06
	P08425	phenylalanyl-tRNA synthetase (No1)	2.1708e+06	546.12	1.15326e+06
	P18408	phosphoadenylyl-sulfate reductase (thioredoxin) (No1)	12600	169.56	843268
	P18408	phosphoadenylyl-sulfate reductase (thioredoxin) (No2)	12600	169.56	843268
	P10963	phosphoenolpyruvate carboxykinase (No1)	223199	2223.72	57071.9
	P33412	phosphoethanolamine cytidyltransferase (No1)	4139.93	108.36	374891
	P16862	phosphofructokinase (No1)	1.2852e+06	2590.56	279583
	P16862	phosphofructokinase (No2)	2.31118e+06	2590.56	279583
	P16861	phosphofructokinase (No2)	2.31118e+06	2590.56	279583
	P16862	phosphofructokinase (s7p) (No1)	1.2852e+06	2590.56	279583
	P16862	phosphofructokinase (s7p) (No2)	2.31118e+06	2590.56	279583
	P16861	phosphofructokinase (s7p) (No2)	2.31118e+06	2590.56	279583
	P53319	phosphogluconate dehydrogenase (No1)	131039	7698.24	184548
	P38720	phosphogluconate dehydrogenase (No2)	131039	7698.24	184548
	P38628	phosphoglucosamine mutase (No1)	10584	3041.64	184570
	P40054	phosphoglycerate dehydrogenase (No1)	1.1196e+06	262.8	90260.6
	P40510	phosphoglycerate dehydrogenase (No2)	1.1196e+06	262.8	90260.6
	P00560	phosphoglycerate kinase (No1)	1.93211e+06	7379.28	427850
	P24521	phosphomevalonate kinase (No1)	12240.1	508.32	503249
	P40506	phosphopantothenate-cysteine ligase (No1)	1908	54	558593
	P33401	phosphopentomutase (No1)	773994	2046.6	454208
	P37012	phosphopentomutase (No2)	773994	2046.6	454208
	Q03262	phosphopentomutase (No3)	622781	180.72	1.04058e+06
	P27616	phosphoribosyl amino imidazolesuccinocarbozamide synthetase (No1)	278715	157.68	454774
	P21264	phosphoribosylaminoimidazole-carboxylase (No1)	144001	1090.8	1.28685e+06
	P00912	phosphoribosylanthranilate isomerase (No1)	248398	1099.8	908490
	P04046	phosphoribosylpyrophosphate amidotransferase (No1)	200208	1330.92	386806
	P32895	phosphoribosylpyrophosphate synthetase (No1)	2375.97	234	158500
	P38620	phosphoribosylpyrophosphate synthetase (No1)	2375.97	234	158500
	P32895	phosphoribosylpyrophosphate synthetase (No2)	2375.97	234	158500
	P38689	phosphoribosylpyrophosphate synthetase (No2)	2375.97	234	158500
	P32895	phosphoribosylpyrophosphate synthetase (No3)	2375.97	234	158500
	P38063	phosphoribosylpyrophosphate synthetase (No3)	2375.97	234	158500
	P38620	phosphoribosylpyrophosphate synthetase (No4)	2375.97	234	158500
	Q12265	phosphoribosylpyrophosphate synthetase (No4)	2375.97	234	158500
	P38063	phosphoribosylpyrophosphate synthetase (No5)	2375.97	234	158500
	Q12265	phosphoribosylpyrophosphate synthetase (No5)	2375.97	234	158500
	P42941	phosphoserine phosphatase (L-serine) (No1)	2.89444e+06	1107.72	1.271e+06
	P33330	phosphoserine transaminase (No1)	8963.79	1564.56	701392
	P38298	phytoceramidase (No1)	579609	194.76	643570
	P21595	phytoceramidase (No1)	460808	82.08	132363
	P50264	polyamine oxidase (No1)	140400	260.64	814567
	P05373	porphobilinogen synthase (No1)	4454.94	610.56	132311
	P50264	poylamine oxidase (No1)	140400	260.64	814567
	P50264	poylamine oxidase (No1)	140400	260.64	814567
	P20049	prephenate dehydrogenase (NADP) (No1)	94679	1238.4	266465
	P09368	proline oxidase (NAD) (No1)	120600	298.44	784389
	P38708	prolyl-tRNA synthetase (No1)	20160.1	226.08	587979
	P40012	protoporphyrinogen oxidase (No1)	7883.95	751.32	771787
	Q07938	purine-nucleoside phosphorylase (No1)	201601	15.48	2.02424e+06
	Q04179	purine-nucleoside phosphorylase (No1)	201601	44.64	833190
	Q05788	purine-nucleoside phosphorylase (No1)	201601	159.12	2.58218e+06
	Q05788	guanosine phosphorylase (No1)	212400	159.12	2.58218e+06
	Q05788	guanosine phosphorylase (No1)	212400	159.12	2.58218e+06
	Q05788	inosine phosphorylase (No1)	428394	159.12	2.58218e+06
	P38075	pyridoxal oxidase (No1)	2519.97	174.24	1.46058e+07
	P38075	pyridoxamine 5'-phosphate oxidase (No1)	370.796	171.72	6.47041e+06
	P38075	pyridoxine 5'-phosphate oxidase (No1)	2519.97	171.72	6.47041e+06
	P38075	pyridoxine oxidase (No1)	2519.97	171.72	6.47041e+06
	P32263	pyrroline-5-carboxylate reductase (No1)	2.49838e+06	39.6	571383
	P32327	pyruvate carboxylase (No1)	216001	4880.88	372547
	P11154	pyruvate carboxylase (No2)	216001	4880.88	372547
	P26263	pyruvate decarboxylase (No1)	223199	837	602867
	P06169	pyruvate decarboxylase (No2)	522000	837	602867
	P16467	pyruvate decarboxylase (No3)	223199	837	602867
	P26263	pyruvate decarboxylase (acetoin-forming) (No1)	223199	837	602867
	P06169	pyruvate decarboxylase (acetoin-forming) (No2)	522000	837	602867
	P16467	pyruvate decarboxylase (acetoin-forming) (No3)	223199	837	602867
	P09624	pyruvate dehydrogenase (No1)	251642	1249.56	1.34705e+06
	P12695	pyruvate dehydrogenase (No1)	251642	656.28	1.43913e+06
	P16387	pyruvate dehydrogenase (No1)	251642	961.92	844602
	P32473	pyruvate dehydrogenase (No1)	251642	961.92	844602
	P00549	pyruvate kinase (No1)	835213	3752.28	709041
	P52489	pyruvate kinase (No2)	835213	3752.28	709041
	P27697	quinone oxidoreductase (No1)	4895.96	775.8	928869
	P41735	quinone oxidoreductase (No1)	4895.96	86.04	1013202
	P49017	quinone oxidoreductase (No1)	4895.96	314.64	753402
	P53318	quinone oxidoreductase (No1)	4895.96	839.16	497652
	Q03778	riboflavin kinase (No1)	359.997	22.32	3.48808e+06
	Q03778	riboflavin kinase (No1)	359.997	22.32	3.48808e+06
	P50861	riboflavin synthase (No1)	83160.1	857.88	1.03177e+07
	P25332	ribokinase (No1)	38880.2	1603.44	2.1678e+06
	P21524	ribonucleotide reductase (No1)	1044	410.04	332325
	P49723	ribonucleotide reductase (No2)	1044	410.04	332325
	P21672	ribonucleotide reductase (No3)	1044	410.04	332325
	P09938	ribonucleotide reductase (No4)	1044	410.04	332325
	P21524	ribonucleotide reductase (No1)	1044	410.04	332325
	P49723	ribonucleotide reductase (No2)	1044	410.04	332325
	P21672	ribonucleotide reductase (No3)	1044	410.04	332325
	P09938	ribonucleotide reductase (No4)	1044	410.04	332325
	P21524	ribonucleotide reductase (No1)	1044	410.04	332325
	P49723	ribonucleotide reductase (No2)	1044	410.04	332325
	P21672	ribonucleotide reductase (No3)	1044	410.04	332325
	P09938	ribonucleotide reductase (No4)	1044	410.04	332325
	P21524	ribonucleotide reductase (No1)	1044	410.04	332325
	P49723	ribonucleotide reductase (No2)	1044	410.04	332325
	P21672	ribonucleotide reductase (No3)	1044	410.04	332325
	P09938	ribonucleotide reductase (No4)	1044	410.04	332325
	P21524	ribonucleotide reductase (No1)	1044	410.04	332325
	P49723	ribonucleotide reductase (No2)	1044	410.04	332325
	P21672	ribonucleotide reductase (No3)	1044	410.04	332325
	P09938	ribonucleotide reductase (No4)	1044	410.04	332325
	P21524	ribonucleotide reductase (No1)	1044	410.04	332325
	P49723	ribonucleotide reductase (No2)	1044	410.04	332325
	P21672	ribonucleotide reductase (No3)	1044	410.04	332325
	P09938	ribonucleotide reductase (No4)	1044	410.04	332325
	Q12189	ribose-5-phosphate isomerase (No1)	34560.2	100.44	1.39762e+06
	P53915	ribosylnicotinamide kinase (No1)	6119.95	45.72	1.13553e+06
	P46969	ribulose 5-phosphate 3-epimerase (No1)	408597	2583.36	1.31976e+08
	P27697	S-adenosyl-L-methionine:3-hexaprenyl-4,5-dihydroxylate O-methyltransferase (No1)	25199.7	576.36	313474
	P41735	S-adenosyl-L-methionine:3-hexaprenyl-4,5-dihydroxylate O-methyltransferase (No1)	25199.7	85.68	360732
	P49017	S-adenosyl-L-methionine:3-hexaprenyl-4,5-dihydroxylate O-methyltransferase (No1)	25199.7	269.64	220126
	P53318	S-adenosyl-L-methionine:3-hexaprenyl-4,5-dihydroxylate O-methyltransferase (No1)	25199.7	327.24	199898
	P25087	S-adenosyl-methionine delta-24-sterol-c-methyltransferase (No1)	39.5993	67.32	147928
	P38998	saccharopine dehydrogenase (NAD, L-lysine forming) (No1)	67681.9	369	172595
	P07284	seryl-tRNA synthetase (No1)	14040	213.48	277788
	P38705	seryl-tRNA synthetase (No2)	14040	213.48	277788
	Q12074	spermidine synthase (No1)	6839.95	13.32	203608
	Q12455	spermine synthase (No1)	115199	44.64	300051
	P47013	sphingoid base-phosphate phosphatase (sphinganine 1-phosphatase) (No1)	2.99877e+06	639.72	563678
	P23501	sphingoid base-phosphate phosphatase (sphinganine 1-phosphatase) (No2)	2.99877e+06	639.72	563678
	Q06147	sphingolipid long chain base kinase (phytosphingosine) (No1)	153.721	80.64	112639
	Q12246	sphingolipid long chain base kinase (phytosphingosine) (No2)	153.721	80.64	112639
	Q06147	sphingolipid long chain base kinase (sphinganine) (No1)	153.721	80.64	112639
	Q12246	sphingolipid long chain base kinase (sphinganine) (No2)	153.721	80.64	112639
	P32476	squalene epoxidase (NAD) (No1)	273.598	399.96	500166
	P29704	squalene synthase (No1)	5940.01	340.2	501445
	P21801	succinate dehydrogenase (ubiquinone-6) (No1)	601214	140.4	168407
	P47052	succinate dehydrogenase (ubiquinone-6) (No1)	601214	140.4	168407
	P21801	succinate dehydrogenase (ubiquinone-6) (No2)	601214	140.4	168407
	Q00711	succinate dehydrogenase (ubiquinone-6) (No2)	601214	140.4	168407
	P21801	succinate dehydrogenase (ubiquinone-6) (No3)	601214	140.4	168407
	P47052	succinate dehydrogenase (ubiquinone-6) (No3)	601214	140.4	168407
	P53312	succinate-CoA ligase (ADP-forming) (No1)	723589	29.52	1.75068e+06
	P53598	succinate-CoA ligase (ADP-forming) (No1)	723589	29.52	1.75068e+06
	P38067	succinate-semialdehyde dehydrogenase (NADP) (No1)	81360.3	700.2	387357
	P08536	sulfate adenylyltransferase (No1)	87842.6	902.88	300673
	P16550	sulfate adenylyltransferase (ADP) (No1)	345602	78.84	452677
	Q12358	taurine dioxygenase (No1)	241202	1986.48	3.70251e+06
	P09624	tetrahydrofolate aminomethyltransferase (No1)	5.91786e+06	535.68	363700
	P48015	tetrahydrofolate aminomethyltransferase (No1)	5.91786e+06	363.96	346208
	P49095	tetrahydrofolate aminomethyltransferase (No1)	5.91786e+06	305.28	462839
	P36001	tetrahydrofolate:L-glutamate gamma-ligase (ADP-forming) (No1)	7199.94	1110.24	110166
	Q08645	tetrahydrofolate:L-glutamate gamma-ligase (ADP-forming) (No2)	7199.94	1110.24	110166
	P24031	thiamin diphosphatase (No1)	248398	631.44	857710
	P24031	thiamin phosphatase (No1)	3.34459e+06	810.72	1.15136e+06
	P35202	thiamine diphosphokinase (No1)	248.398	125.64	623028
	P35202	thiamine-diphosphate kinase (No1)	248.398	125.64	623028
	P40553	thioredoxin (No1)	3.44519e+06	406.44	8.70449e+07
	P40553	thioredoxin (No2)	3.44519e+06	406.44	8.70449e+07
	P37303	threonine aldolase (No1)	154801	744.12	308651
	P16120	threonine synthase (No1)	1.4688e+07	1596.96	466984
	P04801	threonyl-tRNA synthetase (No1)	11952	229.68	747893
	P07236	threonyl-tRNA synthetase (No1)	11952	229.68	747893
	P06785	thymidylate synthase (No1)	172801	21.6	613374
	P32643	trans-aconitate 3-methyltransferase (No1)	25199.7	61.2	406795
	P18900	trans-pentaprenyltranstransferase (No1)	133.2	53.28	96326.3
	P33315	transketolase 1 (No1)	248398	494.64	121818
	P23254	transketolase 1 (No2)	248398	494.64	121818
	P33315	transketolase 2 (No1)	248398	494.64	121818
	P23254	transketolase 2 (No2)	248398	494.64	121818
	P31688	trehalose-phosphatase (No1)	566990	120.96	372673
	Q00764	trehalose-phosphatase (No1)	566990	156.24	567633
	P31688	trehalose-phosphatase (No2)	566990	120.96	372673
	Q00764	trehalose-phosphatase (No2)	566990	156.24	567633
	P00942	triose-phosphate isomerase (No1)	3.11847e+07	7579.44	7.58721e+06
	Q12109	tryptophanyl-tRNA synthetase (No1)	5040.07	95.4	845478
	P04803	tryptophanyl-tRNA synthetase (No1)	5040.07	95.4	845478
	P23542	tyrosine transaminase (No1)	2.41202e+06	779.04	372649
	P36421	tyrosyl-tRNA synthetase (No1)	16560.1	184.32	257386
	P48527	tyrosyl-tRNA synthetase (No1)	16560.1	184.32	257386
	P43123	UDP-N-acetylglucosamine diphosphorylase (No1)	12707.9	163.08	160537
	P15700	UMP kinase (No1)	781189	66.96	745672
	P15700	UMP kinase (No1)	781189	66.96	745672
	P18562	uracil phosphoribosyltransferase (No1)	21960.2	33.12	92436.8
	Q12084	uridine kinase (ATP:uridine) (No1)	11519.9	76.68	214712
	P27515	uridine kinase (ATP:uridine) (No2)	11519.9	76.68	214712
	Q12084	uridine kinase (GTP:uridine) (No1)	11519.9	76.68	214712
	P27515	uridine kinase (GTP:uridine) (No2)	11519.9	76.68	214712
	P15700	uridylate kinase (dUMP) (No1)	20879.9	66.96	745672
	P15700	uridylate kinase (dUMP) (No1)	20879.9	66.96	745672
	P32347	uroporphyrinogen decarboxylase (uroporphyrinogen III) (No1)	80.0384	159.12	82984
	P36150	uroporphyrinogen methyltransferase (No1)	136801	78.84	124571
	P06174	uroporphyrinogen-III synthase (No1)	3.204e+06	61.2	230296
	P38709	UTP-glucose-1-phosphate uridylyltransferase (No1)	336383	276.48	152720
	P32861	UTP-glucose-1-phosphate uridylyltransferase (No2)	97200.6	276.48	152720
	P47176	valine transaminase (No1)	4.44959e+06	621.36	4.94084e+06
	P38891	valine transaminase, mitochondiral (No1)	4.44959e+06	621.36	4.94084e+06
	P07806	valyl-tRNA synthetase (No1)	179999	3873.24	317371
	P07806	valyl-tRNA synthetase (No1)	179999	3873.24	317371
	P47165	xanthine phosphoribosyltransferase (No1)	10440	9.72	513976
	P42826	xylulokinase (No1)	2303.99	1566.36	432471
	P31115	yUMP synthetase (No1)	1.2996e+06	54	557751
	P53167	yUMP synthetase (No2)	1.2996e+06	9312.48	156642
	P48567	yUMP synthetase (No3)	2807.96	155.16	954066
	Q12211	yUMP synthetase (No4)	1.2996e+06	1092.24	988393
	Q12122	homocitrate synthase (No1)	2221.19	471.96	122947
	P39988	pyridoxine kinase (No1)	439194	462.24	739304
	P47039	kynurenine aminotransferase (No1)	723589	978.84	944560
	P38113	alcohol dehydrogenase, (acetaldehyde to ethanol) (No1)	1.0188e+06	3080.16	4.37009e+06
	P00330	alcohol dehydrogenase, (acetaldehyde to ethanol) (No2)	3.24002e+06	3080.16	4.37009e+06
	Q04458	acetaldehyde dehydrogenase (No1)	70922	2096.28	310043
	P47771	acetaldehyde dehydrogenase (No2)	114120	2096.28	310043
	P38840	phenylalanine transaminase (No1)	4.32003e+06	812.88	1.31692e+06
	P38840	tyrosine transaminase (No1)	5.54385e+06	1442.16	592172
	P21954	isocitrate dehydrogenase (No1)	100800	1476	61041.6
	P38286	B-ketoacyl-CoA reductase ((S)-3-hydroxytetradecanoyl-CoA) (No1)	422994	55.8	279777
	P38286	B-ketoacyl-CoA reductase (3-hydroxydocosanoyl-CoA) (No1)	422994	46.8	236562
	P38286	B-ketoacyl-CoA reductase (3-hydroxytetracosanoyl-CoA) (No1)	422994	45.36	225654
	P40857	B-hydroxyacyl-CoA dehydratase (trans-hexadec-2-enoyl-CoA) (No1)	3.38398e+09	29.88	401441
	P40857	B-hydroxyacyl-CoA dehydratase (trans-docos-2-enoyl-CoA) (No1)	3.38398e+09	27.36	380997
	P21147	palmitoyl-CoA desaturase (n-C16:0CoA -> n-C16:1CoA), ER membrane (No1)	1799.99	140.4	1.19515e+06
	P21147	stearoyl-CoA desaturase (n-C18:0CoA -> n-C18:1CoA), ER membrane (No1)	1260	140.4	1.19515e+06
	P30624	fatty-acid--CoA ligase (dodecanoate), ER membrane (No1)	104.4	1083.24	419170
	P47912	fatty-acid--CoA ligase (tetradecanoate), ER membrane (No1)	104.4	1083.24	419170
	P30624	fatty-acid--CoA ligase (tetradecanoate), ER membrane (No2)	104.4	1083.24	419170
	P47912	fatty-acid--CoA ligase (hexadecanoate), ER membrane (No1)	104.4	1083.24	419170
	P30624	fatty-acid--CoA ligase (hexadecanoate), ER membrane (No2)	104.4	1083.24	419170
	P47912	fatty-acid--CoA ligase (hexadecenoate), ER membrane (No1)	104.4	1083.24	419170
	P30624	fatty-acid--CoA ligase (hexadecenoate), ER membrane (No2)	104.4	1083.24	419170
	P47912	fatty-acid--CoA ligase (octadecanoate), ER membrane (No1)	104.4	351	387189
	P30624	fatty-acid--CoA ligase (octadecanoate), ER membrane (No2)	104.4	351	387189
	P47912	fatty-acid--CoA ligase (octadecenoate), ER membrane (No1)	104.4	1083.24	419170
	P30624	fatty-acid--CoA ligase (octadecenoate), ER membrane (No2)	104.4	1083.24	419170
	P30624	fatty-acid--CoA ligase (dodecanoate), lipid particle (No1)	104.4	1083.24	419170
	P47912	fatty-acid--CoA ligase (tetradecanoate), lipid particle (No1)	104.4	1083.24	419170
	P30624	fatty-acid--CoA ligase (tetradecanoate), lipid particle (No2)	104.4	1083.24	419170
	P47912	fatty-acid--CoA ligase (hexadecanoate), lipid particle (No1)	104.4	1083.24	419170
	P30624	fatty-acid--CoA ligase (hexadecanoate), lipid particle (No2)	104.4	1083.24	419170
	P47912	fatty-acid--CoA ligase (hexadecenoate), lipid particle (No1)	104.4	1083.24	419170
	P30624	fatty-acid--CoA ligase (hexadecenoate), lipid particle (No2)	104.4	1083.24	419170
	P47912	fatty-acid--CoA ligase (octadecanoate), lipid particle (No1)	104.4	351	387189
	P30624	fatty-acid--CoA ligase (octadecanoate), lipid particle (No2)	104.4	351	387189
	P47912	fatty-acid--CoA ligase (octadecenoate), lipid particle (No1)	104.4	1083.24	419170
	P30624	fatty-acid--CoA ligase (octadecenoate), lipid particle (No2)	104.4	1083.24	419170
	P39518	fatty-acid--CoA ligase (hexadecenoate), peroxisome (No1)	104.4	1083.24	419170
	P39518	fatty-acid--CoA ligase (octadecanoate), peroxisome (No1)	104.4	351	387189
	P39518	fatty-acid--CoA ligase (octadecenoate), peroxisome (No1)	104.4	1083.24	419170
	P39002	fatty-acid--CoA ligase (arachidate), cell envelope (No1)	104.4	1083.24	419170
	P39002	fatty-acid--CoA ligase (behenate), cell envelope (No1)	104.4	1083.24	419170
	P39002	fatty-acid--CoA ligase (lignoceric acid), cell envelope (No1)	104.4	1921.68	238027
	P39002	fatty-acid--CoA ligase (cerotic acid), cell envelope (No1)	104.4	1083.24	419170
	P41903	peroxisomal acyl-CoA thioesterase (6:0) (No1)	43.2003	31.32	1249776
	P13711	acyl-CoA oxidase (hexanoyl-CoA) (No1)	30924.3	1455.12	358140
	P27796	acetyl-CoA C-acyltransferase (hexanoyl-CoA) (No1)	53279.3	32.04	395986
	P27796	acetyl-CoA C-acyltransferase (icosanoyl-CoA) (No1)	53279.3	32.04	395986
	P27796	acetyl-CoA C-acyltransferase (docosanoyl-CoA) (No1)	53279.3	32.04	395986
	P32784	glycerol-3-phosphate acyltransferase (16:0), ER membrane (No1)	330.48	747.72	166428
	P36148	glycerol-3-phosphate acyltransferase (16:0), ER membrane (No2)	330.48	747.72	166428
	P32784	glycerol-3-phosphate acyltransferase (16:1), ER membrane (No1)	330.48	747.72	166428
	P36148	glycerol-3-phosphate acyltransferase (16:1), ER membrane (No2)	330.48	747.72	166428
	P36148	glycerol-3-phosphate acyltransferase (18:0), ER membrane (No1)	330.48	747.72	166428
	P36148	glycerol-3-phosphate acyltransferase (18:1), ER membrane (No1)	330.48	747.72	166428
	P32784	dihydroxyacetone phosphate acyltransferase (16:0), ER membrane (No1)	330.48	747.72	166428
	P36148	dihydroxyacetone phosphate acyltransferase (16:0), ER membrane (No2)	330.48	747.72	166428
	P32784	dihydroxyacetone phosphate acyltransferase (16:1), ER membrane (No1)	330.48	747.72	166428
	P36148	dihydroxyacetone phosphate acyltransferase (16:1), ER membrane (No2)	330.48	747.72	166428
	P36148	dihydroxyacetone phosphate acyltransferase (18:0), ER membrane (No1)	330.48	747.72	166428
	P36148	dihydroxyacetone phosphate acyltransferase (18:1), ER membrane (No1)	330.48	747.72	166428
	P36148	glycerol-3-phosphate acyltransferase (16:0), lipid particle (No1)	330.48	747.72	166428
	P36148	glycerol-3-phosphate acyltransferase (16:1), lipid particle (No1)	330.48	747.72	166428
	P36148	glycerol-3-phosphate acyltransferase (18:0), lipid particle (No1)	330.48	747.72	166428
	P36148	glycerol-3-phosphate acyltransferase (18:1), lipid particle (No1)	330.48	747.72	166428
	P36148	dihydroxyacetone phosphate acyltransferase (16:0), lipid particle (No1)	330.48	747.72	166428
	P36148	dihydroxyacetone phosphate acyltransferase (16:1), lipid particle (No1)	330.48	747.72	166428
	P36148	dihydroxyacetone phosphate acyltransferase (18:0), lipid particle (No1)	330.48	747.72	166428
	P36148	dihydroxyacetone phosphate acyltransferase (18:1), lipid particle (No1)	330.48	747.72	166428
	P40471	acyl dhap reductase (16:0), ER membrane (No1)	7.7815	264.6	1.84196e+06
	P40471	acyl dhap reductase (18:0), ER membrane (No1)	7.7815	244.08	1.79042e+06
	P40471	acyl dhap reductase (18:1), ER membrane (No1)	7.7815	279.36	1.87613e+06
	P40471	acyl dhap reductase (16:0), lipid particle (No1)	7.7815	264.6	1.84196e+06
	P40471	acyl dhap reductase (18:0), lipid particle (No1)	7.7815	244.08	1.79042e+06
	P40471	acyl dhap reductase (18:1), lipid particle (No1)	7.7815	279.36	1.87613e+06
	P38221	CDP-diacylglycerol synthase (1-16:0, 2-16:1), ER membrane (No1)	32112	151.92	1.61466e+06
	P38221	CDP-diacylglycerol synthase (1-16:1, 2-16:1), ER membrane (No1)	32112	151.92	1.61466e+06
	P38221	CDP-diacylglycerol synthase (1-18:0, 2-16:1), ER membrane (No1)	32112	151.92	1.61466e+06
	P38221	CDP-diacylglycerol synthase (1-18:1, 2-16:1), ER membrane (No1)	32112	151.92	1.61466e+06
	P38221	CDP-diacylglycerol synthase (1-16:0, 2-18:1), ER membrane (No1)	32112	151.92	1.61466e+06
	P38221	CDP-diacylglycerol synthase (1-16:1, 2-18:1), ER membrane (No1)	32112	151.92	1.61466e+06
	P38221	CDP-diacylglycerol synthase (1-18:0, 2-18:1), ER membrane (No1)	32112	151.92	1.61466e+06
	P38221	CDP-diacylglycerol synthase (1-18:1, 2-18:1), ER membrane (No1)	32112	151.92	1.61466e+06
	P38221	CDP-diacylglycerol synthase (1-16:0, 2-16:1), mitochondrial membrane (No1)	32112	151.92	1.61466e+06
	P38221	CDP-diacylglycerol synthase (1-16:1, 2-16:1), mitochondrial membrane (No1)	32112	151.92	1.61466e+06
	P38221	CDP-diacylglycerol synthase (1-18:0, 2-16:1), mitochondrial membrane (No1)	32112	151.92	1.61466e+06
	P38221	CDP-diacylglycerol synthase (1-18:1, 2-16:1), mitochondrial membrane (No1)	32112	151.92	1.61466e+06
	P38221	CDP-diacylglycerol synthase (1-16:0, 2-18:1), mitochondrial membrane (No1)	32112	151.92	1.61466e+06
	P38221	CDP-diacylglycerol synthase (1-16:1, 2-18:1), mitochondrial membrane (No1)	32112	151.92	1.61466e+06
	P08456	PS synthase (1-16:0, 2-18:1), ER membrane (No1)	1.17e+06	51.84	923135
	P06197	PI synthase (1-16:0, 2-18:1), ER membrane (No1)	1631.99	45.72	1.42072e+06
	P05374	PE methyltransferase (1-16:0, 2-16:1), ER membrane (No1)	103080	112.68	140762
	P05375	PE methyltransferase (1-16:0, 2-16:1), ER membrane (No2)	103080	112.68	140762
	P05374	PE methyltransferase (1-16:1, 2-16:1), ER membrane (No1)	103080	112.68	140762
	P05375	PE methyltransferase (1-16:1, 2-16:1), ER membrane (No2)	103080	112.68	140762
	P05374	PE methyltransferase (1-18:0, 2-16:1), ER membrane (No1)	103080	112.68	140762
	P05375	PE methyltransferase (1-18:0, 2-16:1), ER membrane (No2)	103080	112.68	140762
	P05374	PE methyltransferase (1-18:1, 2-16:1), ER membrane (No1)	103080	112.68	140762
	P05375	PE methyltransferase (1-18:1, 2-16:1), ER membrane (No2)	103080	112.68	140762
	P05374	PE methyltransferase (1-16:0, 2-18:1), ER membrane (No1)	103080	112.68	140762
	P05375	PE methyltransferase (1-16:0, 2-18:1), ER membrane (No2)	103080	112.68	140762
	P05374	PE methyltransferase (1-16:1, 2-18:1), ER membrane (No1)	103080	112.68	140762
	P05375	PE methyltransferase (1-16:1, 2-18:1), ER membrane (No2)	103080	112.68	140762
	P05374	PE methyltransferase (1-18:0, 2-18:1), ER membrane (No1)	103080	112.68	140762
	P05375	PE methyltransferase (1-18:0, 2-18:1), ER membrane (No2)	103080	112.68	140762
	P05374	PE methyltransferase (1-18:1, 2-18:1), ER membrane (No1)	103080	112.68	140762
	P05375	PE methyltransferase (1-18:1, 2-18:1), ER membrane (No2)	103080	112.68	140762
	P05375	phosphatidyl-N-methylethanolamine methyltransferase (1-16:0, 2-16:1), ER membrane (No1)	103080	112.68	140762
	P05375	phosphatidyl-N-methylethanolamine methyltransferase (1-16:1, 2-16:1), ER membrane (No1)	103080	112.68	140762
	P05375	phosphatidyl-N-methylethanolamine methyltransferase (1-18:0, 2-16:1), ER membrane (No1)	103080	112.68	140762
	P05375	phosphatidyl-N-methylethanolamine methyltransferase (1-18:1, 2-16:1), ER membrane (No1)	103080	112.68	140762
	P05375	phosphatidyl-N-methylethanolamine methyltransferase (1-16:0, 2-18:1), ER membrane (No1)	103080	112.68	140762
	P05375	phosphatidyl-N-methylethanolamine methyltransferase (1-16:1, 2-18:1), ER membrane (No1)	103080	112.68	140762
	P05375	phosphatidyl-N-methylethanolamine methyltransferase (1-18:0, 2-18:1), ER membrane (No1)	103080	112.68	140762
	P05375	phosphatidyl-N-methylethanolamine methyltransferase (1-18:1, 2-18:1), ER membrane (No1)	103080	112.68	140762
	P05375	phosphatidyl-N,N-dimethylethanolamine methyltransferase (1-16:0, 2-16:1), ER membrane (No1)	103080	112.68	140762
	P05375	phosphatidyl-N,N-dimethylethanolamine methyltransferase (1-16:1, 2-16:1), ER membrane (No1)	103080	112.68	140762
	P05375	phosphatidyl-N,N-dimethylethanolamine methyltransferase (1-18:0, 2-16:1), ER membrane (No1)	103080	112.68	140762
	P05375	phosphatidyl-N,N-dimethylethanolamine methyltransferase (1-18:1, 2-16:1), ER membrane (No1)	103080	112.68	140762
	P05375	phosphatidyl-N,N-dimethylethanolamine methyltransferase (1-16:0, 2-18:1), ER membrane (No1)	103080	112.68	140762
	P05375	phosphatidyl-N,N-dimethylethanolamine methyltransferase (1-16:1, 2-18:1), ER membrane (No1)	103080	112.68	140762
	P05375	phosphatidyl-N,N-dimethylethanolamine methyltransferase (1-18:0, 2-18:1), ER membrane (No1)	103080	112.68	140762
	P05375	phosphatidyl-N,N-dimethylethanolamine methyltransferase (1-18:1, 2-18:1), ER membrane (No1)	103080	112.68	140762
	Q12382	DAG kinase (1-16:0, 2-16:1), ER membrane (No1)	71999.4	64.44	797993
	Q12382	DAG kinase (1-16:1, 2-16:1), ER membrane (No1)	71999.4	64.44	797993
	Q12382	DAG kinase (1-18:0, 2-16:1), ER membrane (No1)	71999.4	64.44	797993
	Q12382	DAG kinase (1-18:1, 2-16:1), ER membrane (No1)	71999.4	64.44	797993
	Q12382	DAG kinase (1-16:0, 2-18:1), ER membrane (No1)	71999.4	64.44	797993
	Q12382	DAG kinase (1-16:1, 2-18:1), ER membrane (No1)	71999.4	64.44	797993
	Q12382	DAG kinase (1-18:0, 2-18:1), ER membrane (No1)	71999.4	64.44	797993
	Q12382	DAG kinase (1-18:1, 2-18:1), ER membrane (No1)	71999.4	64.44	797993
	P22140	ethanolaminephosphotransferase (1-16:0, 2-16:1), ER membrane (No1)	212.879	367.92	775054
	P22140	ethanolaminephosphotransferase (1-16:1, 2-16:1), ER membrane (No1)	212.879	367.92	775054
	P22140	ethanolaminephosphotransferase (1-18:0, 2-16:1), ER membrane (No1)	212.879	367.92	775054
	P22140	ethanolaminephosphotransferase (1-18:1, 2-16:1), ER membrane (No1)	212.879	367.92	775054
	P22140	ethanolaminephosphotransferase (1-16:0, 2-18:1), ER membrane (No1)	212.879	367.92	775054
	P22140	ethanolaminephosphotransferase (1-16:1, 2-18:1), ER membrane (No1)	212.879	367.92	775054
	P22140	ethanolaminephosphotransferase (1-18:0, 2-18:1), ER membrane (No1)	212.879	367.92	775054
	P22140	ethanolaminephosphotransferase (1-18:1, 2-18:1), ER membrane (No1)	212.879	367.92	775054
	P22140	cholinephosphotransferase (1-16:0, 2-16:1), ER membrane (No1)	212.879	367.92	775054
	P17898	cholinephosphotransferase (1-16:0, 2-16:1), ER membrane (No2)	1.0044	367.92	775054
	P22140	cholinephosphotransferase (1-16:1, 2-16:1), ER membrane (No1)	212.879	367.92	775054
	P17898	cholinephosphotransferase (1-16:1, 2-16:1), ER membrane (No2)	1.0044	367.92	775054
	P22140	cholinephosphotransferase (1-18:0, 2-16:1), ER membrane (No1)	212.879	367.92	775054
	P17898	cholinephosphotransferase (1-18:0, 2-16:1), ER membrane (No2)	1.0044	367.92	775054
	P22140	cholinephosphotransferase (1-18:1, 2-16:1), ER membrane (No1)	212.879	367.92	775054
	P17898	cholinephosphotransferase (1-18:1, 2-16:1), ER membrane (No2)	1.0044	367.92	775054
	P22140	cholinephosphotransferase (1-16:0, 2-18:1), ER membrane (No1)	212.879	367.92	775054
	P17898	cholinephosphotransferase (1-16:0, 2-18:1), ER membrane (No2)	1.0044	367.92	775054
	P22140	cholinephosphotransferase (1-16:1, 2-18:1), ER membrane (No1)	212.879	367.92	775054
	P17898	cholinephosphotransferase (1-16:1, 2-18:1), ER membrane (No2)	1.0044	367.92	775054
	P22140	cholinephosphotransferase (1-18:0, 2-18:1), ER membrane (No1)	212.879	367.92	775054
	P17898	cholinephosphotransferase (1-18:0, 2-18:1), ER membrane (No2)	1.0044	367.92	775054
	P22140	cholinephosphotransferase (1-18:1, 2-18:1), ER membrane (No1)	212.879	367.92	775054
	P17898	cholinephosphotransferase (1-18:1, 2-18:1), ER membrane (No2)	1.0044	367.92	775054
	P25578	phosphatidylglycerolphosphate synthase (1-16:0, 2-16:1), mitochondrial membrane (No1)	8423.89	1131.12	807988
	P25578	phosphatidylglycerolphosphate synthase (1-16:1, 2-16:1), mitochondrial membrane (No1)	8423.89	1131.12	807988
	P25578	phosphatidylglycerolphosphate synthase (1-18:0, 2-16:1), mitochondrial membrane (No1)	8423.89	1131.12	807988
	P25578	phosphatidylglycerolphosphate synthase (1-18:1, 2-16:1), mitochondrial membrane (No1)	8423.89	1131.12	807988
	P25578	phosphatidylglycerolphosphate synthase (1-16:0, 2-18:1), mitochondrial membrane (No1)	8423.89	947.16	630283
	P25578	phosphatidylglycerolphosphate synthase (1-16:1, 2-18:1), mitochondrial membrane (No1)	8423.89	1131.12	807988
	Q07560	CL synthase (1-16:0, 2-18:1, 3-16:0, 4-16:1), mitochondrial membrane (No1)	7.38716	78.12	1.56022e+06
	Q07560	CL synthase (1-16:0, 2-18:1, 3-16:1, 4-16:1), mitochondrial membrane (No1)	7.38716	78.12	1.56022e+06
	Q07560	CL synthase (1-16:0, 2-18:1, 3-18:0, 4-16:1), mitochondrial membrane (No1)	7.38716	78.12	1.56022e+06
	Q07560	CL synthase (1-16:0, 2-18:1, 3-18:1, 4-16:1), mitochondrial membrane (No1)	7.38716	78.12	1.56022e+06
	Q07560	CL synthase (1-16:0, 2-18:1, 3-16:0, 4-18:1), mitochondrial membrane (No1)	7.38716	78.12	1.56022e+06
	Q07560	CL synthase (1-16:0, 2-18:1, 3-16:1, 4-18:1), mitochondrial membrane (No1)	7.38716	78.12	1.56022e+06
	P42951	phosphatidylinositol 4-kinase (1-16:0, 2-16:1), cell envelope (No1)	9972.08	746.28	699776
	P37297	phosphatidylinositol 4-kinase (1-16:0, 2-16:1), cell envelope (No2)	9972.08	746.28	699776
	P42951	phosphatidylinositol 4-kinase (1-16:1, 2-16:1), cell envelope (No1)	9972.08	746.28	699776
	P37297	phosphatidylinositol 4-kinase (1-16:1, 2-16:1), cell envelope (No2)	9972.08	746.28	699776
	P42951	phosphatidylinositol 4-kinase (1-18:0, 2-16:1), cell envelope (No1)	9972.08	746.28	699776
	P37297	phosphatidylinositol 4-kinase (1-18:0, 2-16:1), cell envelope (No2)	9972.08	746.28	699776
	P42951	phosphatidylinositol 4-kinase (1-18:1, 2-16:1), cell envelope (No1)	9972.08	746.28	699776
	P37297	phosphatidylinositol 4-kinase (1-18:1, 2-16:1), cell envelope (No2)	9972.08	746.28	699776
	P42951	phosphatidylinositol 4-kinase (1-16:0, 2-18:1), cell envelope (No1)	9972.08	746.28	699776
	P37297	phosphatidylinositol 4-kinase (1-16:0, 2-18:1), cell envelope (No2)	9972.08	746.28	699776
	P42951	phosphatidylinositol 4-kinase (1-16:1, 2-18:1), cell envelope (No1)	9972.08	746.28	699776
	P37297	phosphatidylinositol 4-kinase (1-16:1, 2-18:1), cell envelope (No2)	9972.08	746.28	699776
	P42951	phosphatidylinositol 4-kinase (1-18:0, 2-18:1), cell envelope (No1)	9972.08	746.28	699776
	P37297	phosphatidylinositol 4-kinase (1-18:0, 2-18:1), cell envelope (No2)	9972.08	746.28	699776
	P42951	phosphatidylinositol 4-kinase (1-18:1, 2-18:1), cell envelope (No1)	9972.08	746.28	699776
	P37297	phosphatidylinositol 4-kinase (1-18:1, 2-18:1), cell envelope (No2)	9972.08	746.28	699776
	P42951	phosphatidylinositol 4-kinase (1-16:0, 2-16:1), vacuolar membrane (No1)	9972.08	746.28	699776
	P42951	phosphatidylinositol 4-kinase (1-16:1, 2-16:1), vacuolar membrane (No1)	9972.08	746.28	699776
	P42951	phosphatidylinositol 4-kinase (1-18:0, 2-16:1), vacuolar membrane (No1)	9972.08	746.28	699776
	P42951	phosphatidylinositol 4-kinase (1-18:1, 2-16:1), vacuolar membrane (No1)	9972.08	746.28	699776
	P42951	phosphatidylinositol 4-kinase (1-16:0, 2-18:1), vacuolar membrane (No1)	9972.08	746.28	699776
	P42951	phosphatidylinositol 4-kinase (1-16:1, 2-18:1), vacuolar membrane (No1)	9972.08	746.28	699776
	P42951	phosphatidylinositol 4-kinase (1-18:0, 2-18:1), vacuolar membrane (No1)	9972.08	746.28	699776
	P42951	phosphatidylinositol 4-kinase (1-18:1, 2-18:1), vacuolar membrane (No1)	9972.08	746.28	699776
	P39104	phosphatidylinositol 4-kinase (1-16:0, 2-16:1), Golgi membrane (No1)	9972.08	746.28	699776
	P39104	phosphatidylinositol 4-kinase (1-16:1, 2-16:1), Golgi membrane (No1)	9972.08	746.28	699776
	P39104	phosphatidylinositol 4-kinase (1-18:0, 2-16:1), Golgi membrane (No1)	9972.08	746.28	699776
	P39104	phosphatidylinositol 4-kinase (1-18:1, 2-16:1), Golgi membrane (No1)	9972.08	746.28	699776
	P39104	phosphatidylinositol 4-kinase (1-16:0, 2-18:1), Golgi membrane (No1)	9972.08	746.28	699776
	P39104	phosphatidylinositol 4-kinase (1-16:1, 2-18:1), Golgi membrane (No1)	9972.08	746.28	699776
	P39104	phosphatidylinositol 4-kinase (1-18:0, 2-18:1), Golgi membrane (No1)	9972.08	746.28	699776
	P39104	phosphatidylinositol 4-kinase (1-18:1, 2-18:1), Golgi membrane (No1)	9972.08	746.28	699776
	P39104	phosphatidylinositol 4-kinase (1-16:0, 2-16:1), nucleus (No1)	9972.08	746.28	699776
	P39104	phosphatidylinositol 4-kinase (1-16:1, 2-16:1), nucleus (No1)	9972.08	746.28	699776
	P39104	phosphatidylinositol 4-kinase (1-18:0, 2-16:1), nucleus (No1)	9972.08	746.28	699776
	P39104	phosphatidylinositol 4-kinase (1-18:1, 2-16:1), nucleus (No1)	9972.08	746.28	699776
	P39104	phosphatidylinositol 4-kinase (1-16:0, 2-18:1), nucleus (No1)	9972.08	746.28	699776
	P39104	phosphatidylinositol 4-kinase (1-16:1, 2-18:1), nucleus (No1)	9972.08	746.28	699776
	P39104	phosphatidylinositol 4-kinase (1-18:0, 2-18:1), nucleus (No1)	9972.08	746.28	699776
	P39104	phosphatidylinositol 4-kinase (1-18:1, 2-18:1), nucleus (No1)	9972.08	746.28	699776
	P22219	phosphatidylinositol 3-kinase (1-16:0, 2-16:1), vacuolar membrane (No1)	0.576004	2103.48	81403.9
	P22543	phosphatidylinositol 3-kinase (1-16:0, 2-16:1), vacuolar membrane (No1)	0.576004	1392.84	258949
	P22219	phosphatidylinositol 3-kinase (1-16:1, 2-16:1), vacuolar membrane (No1)	0.576004	2103.48	81403.9
	P22543	phosphatidylinositol 3-kinase (1-16:1, 2-16:1), vacuolar membrane (No1)	0.576004	1392.84	258949
	P22219	phosphatidylinositol 3-kinase (1-18:0, 2-16:1), vacuolar membrane (No1)	0.576004	2103.48	81403.9
	P22543	phosphatidylinositol 3-kinase (1-18:0, 2-16:1), vacuolar membrane (No1)	0.576004	1392.84	258949
	P22219	phosphatidylinositol 3-kinase (1-18:1, 2-16:1), vacuolar membrane (No1)	0.576004	2103.48	81403.9
	P22543	phosphatidylinositol 3-kinase (1-18:1, 2-16:1), vacuolar membrane (No1)	0.576004	1392.84	258949
	P22219	phosphatidylinositol 3-kinase (1-16:0, 2-18:1), vacuolar membrane (No1)	0.576004	2103.48	81403.9
	P22543	phosphatidylinositol 3-kinase (1-16:0, 2-18:1), vacuolar membrane (No1)	0.576004	1392.84	258949
	P22219	phosphatidylinositol 3-kinase (1-16:1, 2-18:1), vacuolar membrane (No1)	0.576004	2103.48	81403.9
	P22543	phosphatidylinositol 3-kinase (1-16:1, 2-18:1), vacuolar membrane (No1)	0.576004	1392.84	258949
	P22219	phosphatidylinositol 3-kinase (1-18:0, 2-18:1), vacuolar membrane (No1)	0.576004	2103.48	81403.9
	P22543	phosphatidylinositol 3-kinase (1-18:0, 2-18:1), vacuolar membrane (No1)	0.576004	1392.84	258949
	P22219	phosphatidylinositol 3-kinase (1-18:1, 2-18:1), vacuolar membrane (No1)	0.576004	2103.48	81403.9
	P22543	phosphatidylinositol 3-kinase (1-18:1, 2-18:1), vacuolar membrane (No1)	0.576004	1392.84	258949
	P38994	PI 4-P 5-kinase (1-16:0, 2-16:1), nucleus (No1)	6441.22	1.08	305145
	P38994	PI 4-P 5-kinase (1-16:1, 2-16:1), nucleus (No1)	6441.22	1.08	305145
	P38994	PI 4-P 5-kinase (1-18:0, 2-16:1), nucleus (No1)	6441.22	1.08	305145
	P38994	PI 4-P 5-kinase (1-18:1, 2-16:1), nucleus (No1)	6441.22	1.08	305145
	P38994	PI 4-P 5-kinase (1-16:0, 2-18:1), nucleus (No1)	6441.22	1.08	305145
	P38994	PI 4-P 5-kinase (1-16:1, 2-18:1), nucleus (No1)	6441.22	1.08	305145
	P38994	PI 4-P 5-kinase (1-18:0, 2-18:1), nucleus (No1)	6441.22	1.08	305145
	P38994	PI 4-P 5-kinase (1-18:1, 2-18:1), nucleus (No1)	6441.22	1.08	305145
	P38994	PI 4-P 5-kinase (1-16:0, 2-16:1), cell envelope (No1)	6441.22	1.08	305145
	P38994	PI 4-P 5-kinase (1-16:1, 2-16:1), cell envelope (No1)	6441.22	1.08	305145
	P38994	PI 4-P 5-kinase (1-18:0, 2-16:1), cell envelope (No1)	6441.22	1.08	305145
	P38994	PI 4-P 5-kinase (1-18:1, 2-16:1), cell envelope (No1)	6441.22	1.08	305145
	P38994	PI 4-P 5-kinase (1-16:0, 2-18:1), cell envelope (No1)	6441.22	1.08	305145
	P38994	PI 4-P 5-kinase (1-16:1, 2-18:1), cell envelope (No1)	6441.22	1.08	305145
	P38994	PI 4-P 5-kinase (1-18:0, 2-18:1), cell envelope (No1)	6441.22	1.08	305145
	P38994	PI 4-P 5-kinase (1-18:1, 2-18:1), cell envelope (No1)	6441.22	1.08	305145
	P34756	PI 3-P 5-kinase (1-16:0, 2-16:1), vacuolar membrane (No1)	200880	2403	69754.3
	P34756	PI 3-P 5-kinase (1-16:1, 2-16:1), vacuolar membrane (No1)	200880	2403	69754.3
	P34756	PI 3-P 5-kinase (1-18:0, 2-16:1), vacuolar membrane (No1)	200880	2403	69754.3
	P34756	PI 3-P 5-kinase (1-18:1, 2-16:1), vacuolar membrane (No1)	200880	2403	69754.3
	P34756	PI 3-P 5-kinase (1-16:0, 2-18:1), vacuolar membrane (No1)	200880	2403	69754.3
	P34756	PI 3-P 5-kinase (1-16:1, 2-18:1), vacuolar membrane (No1)	200880	2403	69754.3
	P34756	PI 3-P 5-kinase (1-18:0, 2-18:1), vacuolar membrane (No1)	200880	2403	69754.3
	P34756	PI 3-P 5-kinase (1-18:1, 2-18:1), vacuolar membrane (No1)	200880	2403	69754.3
	P34163	ergosteryl ester hydrolase (16:1), lipid particle (No1)	12.6	45.72	141747
	Q07804	ergosteryl ester hydrolase (16:1), lipid particle (No2)	12.6	45.72	141747
	P34163	ergosteryl ester hydrolase (18:1), lipid particle (No1)	12.6	46.08	143859
	Q07804	ergosteryl ester hydrolase (18:1), lipid particle (No2)	12.6	46.08	143859
	Q07804	episteryl ester hydrolase (16:1), lipid particle (No1)	12.6	19.08	214034
	Q07804	episteryl ester hydrolase (18:1), lipid particle (No1)	12.6	19.44	212953
	Q07804	fecosteryl ester hydrolase (16:1), lipid particle (No1)	12.6	12.96	172410
	Q07804	fecosteryl ester hydrolase (18:1), lipid particle (No1)	12.6	13.68	173315
	Q07804	lanosteryl ester hydrolase (16:1), lipid particle (No1)	12.6	29.88	245704
	Q07804	lanosteryl ester hydrolase (18:1), lipid particle (No1)	12.6	29.88	242973
	Q07804	zymosteryl ester hydrolase (16:1), lipid particle (No1)	12.6	16.92	184788
	Q07804	zymosteryl ester hydrolase (18:1), lipid particle (No1)	12.6	17.64	185154
	Q07950	zymosteryl ester hydrolase (16:1), cell envelope (No1)	12.6	16.92	184788
	Q07950	zymosteryl ester hydrolase (18:1), cell envelope (No1)	12.6	17.64	185154
	P32316	succinyl-CoA:acetate CoA transferase (No1)	26136.3	3059.28	442268
	Q04179	uridine hydrolase (No1)	71999.4	84.24	447208
	P17255	V-ATPase, Golgi (No1)	1.404e+06	1021.68	93094.9
	P17255	V-ATPase, vacuole (No1)	1.404e+06	1021.68	93094.9
	P38954	inositolphosphotransferase (PI (1-16:0, 2-16:1) MIPC-A (C24)) (No1)	3.55316e+06	648.72	2.27505e+06
	P38954	inositolphosphotransferase (PI (1-16:1, 2-16:1) MIPC-A (C24)) (No1)	3.55316e+06	648.72	2.27505e+06
	P38954	inositolphosphotransferase (PI (1-18:0, 2-16:1) MIPC-A (C24)) (No1)	3.55316e+06	648.72	2.27505e+06
	P38954	inositolphosphotransferase (PI (1-18:1, 2-16:1) MIPC-A (C24)) (No1)	3.55316e+06	648.72	2.27505e+06
	P38954	inositolphosphotransferase (PI (1-16:0, 2-18:1) MIPC-A (C24)) (No1)	3.55316e+06	648.72	2.27505e+06
	P38954	inositolphosphotransferase (PI (1-16:1, 2-18:1) MIPC-A (C24)) (No1)	3.55316e+06	648.72	2.27505e+06
	P38954	inositolphosphotransferase (PI (1-18:0, 2-18:1) MIPC-A (C24)) (No1)	3.55316e+06	648.72	2.27505e+06
	P38954	inositolphosphotransferase (PI (1-18:1, 2-18:1) MIPC-A (C24)) (No1)	3.55316e+06	648.72	2.27505e+06
	P38954	inositolphosphotransferase (PI (1-16:0, 2-16:1) MIPC-A (C26)) (No1)	3.55316e+06	648.72	2.27505e+06
	P38954	inositolphosphotransferase (PI (1-16:1, 2-16:1) MIPC-A (C26)) (No1)	3.55316e+06	648.72	2.27505e+06
	P38954	inositolphosphotransferase (PI (1-18:0, 2-16:1) MIPC-A (C26)) (No1)	3.55316e+06	648.72	2.27505e+06
	P38954	inositolphosphotransferase (PI (1-18:1, 2-16:1) MIPC-A (C26)) (No1)	3.55316e+06	648.72	2.27505e+06
	P38954	inositolphosphotransferase (PI (1-16:0, 2-18:1) MIPC-A (C26)) (No1)	3.55316e+06	648.72	2.27505e+06
	P38954	inositolphosphotransferase (PI (1-16:1, 2-18:1) MIPC-A (C26)) (No1)	3.55316e+06	648.72	2.27505e+06
	P38954	inositolphosphotransferase (PI (1-18:0, 2-18:1) MIPC-A (C26)) (No1)	3.55316e+06	648.72	2.27505e+06
	P38954	inositolphosphotransferase (PI (1-18:1, 2-18:1) MIPC-A (C26)) (No1)	3.55316e+06	648.72	2.27505e+06
	P38954	inositolphosphotransferase (PI (1-16:0, 2-16:1) MIPC-B' (C24)) (No1)	3.55316e+06	648.72	2.27505e+06
	P38954	inositolphosphotransferase (PI (1-16:1, 2-16:1) MIPC-B' (C24)) (No1)	3.55316e+06	648.72	2.27505e+06
	P38954	inositolphosphotransferase (PI (1-18:0, 2-16:1) MIPC-B' (C24)) (No1)	3.55316e+06	648.72	2.27505e+06
	P38954	inositolphosphotransferase (PI (1-18:1, 2-16:1) MIPC-B' (C24)) (No1)	3.55316e+06	648.72	2.27505e+06
	P38954	inositolphosphotransferase (PI (1-16:0, 2-18:1) MIPC-B' (C24)) (No1)	3.55316e+06	648.72	2.27505e+06
	P38954	inositolphosphotransferase (PI (1-16:1, 2-18:1) MIPC-B' (C24)) (No1)	3.55316e+06	648.72	2.27505e+06
	P38954	inositolphosphotransferase (PI (1-18:0, 2-18:1) MIPC-B' (C24)) (No1)	3.55316e+06	648.72	2.27505e+06
	P38954	inositolphosphotransferase (PI (1-18:1, 2-18:1) MIPC-B' (C24)) (No1)	3.55316e+06	648.72	2.27505e+06
	P38954	inositolphosphotransferase (PI (1-16:0, 2-16:1) MIPC-B' (C26)) (No1)	3.55316e+06	648.72	2.27505e+06
	P38954	inositolphosphotransferase (PI (1-16:1, 2-16:1) MIPC-B' (C26)) (No1)	3.55316e+06	648.72	2.27505e+06
	P38954	inositolphosphotransferase (PI (1-18:0, 2-16:1) MIPC-B' (C26)) (No1)	3.55316e+06	648.72	2.27505e+06
	P38954	inositolphosphotransferase (PI (1-18:1, 2-16:1) MIPC-B' (C26)) (No1)	3.55316e+06	648.72	2.27505e+06
	P38954	inositolphosphotransferase (PI (1-16:0, 2-18:1) MIPC-B' (C26)) (No1)	3.55316e+06	648.72	2.27505e+06
	P38954	inositolphosphotransferase (PI (1-16:1, 2-18:1) MIPC-B' (C26)) (No1)	3.55316e+06	648.72	2.27505e+06
	P38954	inositolphosphotransferase (PI (1-18:0, 2-18:1) MIPC-B' (C26)) (No1)	3.55316e+06	648.72	2.27505e+06
	P38954	inositolphosphotransferase (PI (1-18:1, 2-18:1) MIPC-B' (C26)) (No1)	3.55316e+06	648.72	2.27505e+06
	P38954	inositolphosphotransferase (PI (1-16:0, 2-16:1) MIPC-B (C24)) (No1)	3.55316e+06	648.72	2.27505e+06
	P38954	inositolphosphotransferase (PI (1-16:1, 2-16:1) MIPC-B (C24)) (No1)	3.55316e+06	648.72	2.27505e+06
	P38954	inositolphosphotransferase (PI (1-18:0, 2-16:1) MIPC-B (C24)) (No1)	3.55316e+06	648.72	2.27505e+06
	P38954	inositolphosphotransferase (PI (1-18:1, 2-16:1) MIPC-B (C24)) (No1)	3.55316e+06	648.72	2.27505e+06
	P38954	inositolphosphotransferase (PI (1-16:0, 2-18:1) MIPC-B (C24)) (No1)	3.55316e+06	648.72	2.27505e+06
	P38954	inositolphosphotransferase (PI (1-16:1, 2-18:1) MIPC-B (C24)) (No1)	3.55316e+06	648.72	2.27505e+06
	P38954	inositolphosphotransferase (PI (1-18:0, 2-18:1) MIPC-B (C24)) (No1)	3.55316e+06	648.72	2.27505e+06
	P38954	inositolphosphotransferase (PI (1-18:1, 2-18:1) MIPC-B (C24)) (No1)	3.55316e+06	648.72	2.27505e+06
	P38954	inositolphosphotransferase (PI (1-16:0, 2-16:1) MIPC-B (C26)) (No1)	3.55316e+06	648.72	2.27505e+06
	P38954	inositolphosphotransferase (PI (1-16:1, 2-16:1) MIPC-B (C26)) (No1)	3.55316e+06	648.72	2.27505e+06
	P38954	inositolphosphotransferase (PI (1-18:0, 2-16:1) MIPC-B (C26)) (No1)	3.55316e+06	648.72	2.27505e+06
	P38954	inositolphosphotransferase (PI (1-18:1, 2-16:1) MIPC-B (C26)) (No1)	3.55316e+06	648.72	2.27505e+06
	P38954	inositolphosphotransferase (PI (1-16:0, 2-18:1) MIPC-B (C26)) (No1)	3.55316e+06	648.72	2.27505e+06
	P38954	inositolphosphotransferase (PI (1-16:1, 2-18:1) MIPC-B (C26)) (No1)	3.55316e+06	648.72	2.27505e+06
	P38954	inositolphosphotransferase (PI (1-18:0, 2-18:1) MIPC-B (C26)) (No1)	3.55316e+06	648.72	2.27505e+06
	P38954	inositolphosphotransferase (PI (1-18:1, 2-18:1) MIPC-B (C26)) (No1)	3.55316e+06	648.72	2.27505e+06
	P38954	inositolphosphotransferase (PI (1-16:0, 2-16:1) MIPC-C (C24)) (No1)	3.55316e+06	648.72	2.27505e+06
	P38954	inositolphosphotransferase (PI (1-16:1, 2-16:1) MIPC-C (C24)) (No1)	3.55316e+06	648.72	2.27505e+06
	P38954	inositolphosphotransferase (PI (1-18:0, 2-16:1) MIPC-C (C24)) (No1)	3.55316e+06	648.72	2.27505e+06
	P38954	inositolphosphotransferase (PI (1-18:1, 2-16:1) MIPC-C (C24)) (No1)	3.55316e+06	648.72	2.27505e+06
	P38954	inositolphosphotransferase (PI (1-16:0, 2-18:1) MIPC-C (C24)) (No1)	3.55316e+06	648.72	2.27505e+06
	P38954	inositolphosphotransferase (PI (1-16:1, 2-18:1) MIPC-C (C24)) (No1)	3.55316e+06	648.72	2.27505e+06
	P38954	inositolphosphotransferase (PI (1-18:0, 2-18:1) MIPC-C (C24)) (No1)	3.55316e+06	648.72	2.27505e+06
	P38954	inositolphosphotransferase (PI (1-18:1, 2-18:1) MIPC-C (C24)) (No1)	3.55316e+06	648.72	2.27505e+06
	P38954	inositolphosphotransferase (PI (1-16:0, 2-16:1) MIPC-C (C26)) (No1)	3.55316e+06	648.72	2.27505e+06
	P38954	inositolphosphotransferase (PI (1-16:1, 2-16:1) MIPC-C (C26)) (No1)	3.55316e+06	648.72	2.27505e+06
	P38954	inositolphosphotransferase (PI (1-18:0, 2-16:1) MIPC-C (C26)) (No1)	3.55316e+06	648.72	2.27505e+06
	P38954	inositolphosphotransferase (PI (1-18:1, 2-16:1) MIPC-C (C26)) (No1)	3.55316e+06	648.72	2.27505e+06
	P38954	inositolphosphotransferase (PI (1-16:0, 2-18:1) MIPC-C (C26)) (No1)	3.55316e+06	648.72	2.27505e+06
	P38954	inositolphosphotransferase (PI (1-16:1, 2-18:1) MIPC-C (C26)) (No1)	3.55316e+06	648.72	2.27505e+06
	P38954	inositolphosphotransferase (PI (1-18:0, 2-18:1) MIPC-C (C26)) (No1)	3.55316e+06	648.72	2.27505e+06
	P38954	inositolphosphotransferase (PI (1-18:1, 2-18:1) MIPC-C (C26)) (No1)	3.55316e+06	648.72	2.27505e+06
	P38954	inositolphosphotransferase (PI (1-16:0, 2-16:1) MIPC-D (C24)) (No1)	3.55316e+06	648.72	2.27505e+06
	P38954	inositolphosphotransferase (PI (1-16:1, 2-16:1) MIPC-D (C24)) (No1)	3.55316e+06	648.72	2.27505e+06
	P38954	inositolphosphotransferase (PI (1-18:0, 2-16:1) MIPC-D (C24)) (No1)	3.55316e+06	648.72	2.27505e+06
	P38954	inositolphosphotransferase (PI (1-18:1, 2-16:1) MIPC-D (C24)) (No1)	3.55316e+06	648.72	2.27505e+06
	P38954	inositolphosphotransferase (PI (1-16:0, 2-18:1) MIPC-D (C24)) (No1)	3.55316e+06	648.72	2.27505e+06
	P38954	inositolphosphotransferase (PI (1-16:1, 2-18:1) MIPC-D (C24)) (No1)	3.55316e+06	648.72	2.27505e+06
	P38954	inositolphosphotransferase (PI (1-18:0, 2-18:1) MIPC-D (C24)) (No1)	3.55316e+06	648.72	2.27505e+06
	P38954	inositolphosphotransferase (PI (1-18:1, 2-18:1) MIPC-D (C24)) (No1)	3.55316e+06	648.72	2.27505e+06
	P38954	inositolphosphotransferase (PI (1-16:0, 2-16:1) MIPC-D (C26)) (No1)	3.55316e+06	648.72	2.27505e+06
	P38954	inositolphosphotransferase (PI (1-16:1, 2-16:1) MIPC-D (C26)) (No1)	3.55316e+06	648.72	2.27505e+06
	P38954	inositolphosphotransferase (PI (1-18:0, 2-16:1) MIPC-D (C26)) (No1)	3.55316e+06	648.72	2.27505e+06
	P38954	inositolphosphotransferase (PI (1-18:1, 2-16:1) MIPC-D (C26)) (No1)	3.55316e+06	648.72	2.27505e+06
	P38954	inositolphosphotransferase (PI (1-16:0, 2-18:1) MIPC-D (C26)) (No1)	3.55316e+06	648.72	2.27505e+06
	P38954	inositolphosphotransferase (PI (1-16:1, 2-18:1) MIPC-D (C26)) (No1)	3.55316e+06	648.72	2.27505e+06
	P38954	inositolphosphotransferase (PI (1-18:0, 2-18:1) MIPC-D (C26)) (No1)	3.55316e+06	648.72	2.27505e+06
	P38954	inositolphosphotransferase (PI (1-18:1, 2-18:1) MIPC-D (C26)) (No1)	3.55316e+06	648.72	2.27505e+06
	P36107	IPC synthase (PI (1-16:0, 2-16:1) ceramide-1 (C24)) (No1)	3.55316e+06	59.04	409821
	P36107	IPC synthase (PI (1-16:1, 2-16:1) ceramide-1 (C24)) (No1)	3.55316e+06	59.04	409821
	P36107	IPC synthase (PI (1-18:0, 2-16:1) ceramide-1 (C24)) (No1)	3.55316e+06	59.04	409821
	P36107	IPC synthase (PI (1-18:1, 2-16:1) ceramide-1 (C24)) (No1)	3.55316e+06	59.04	409821
	P36107	IPC synthase (PI (1-16:0, 2-18:1) ceramide-1 (C24)) (No1)	3.55316e+06	59.04	409821
	P36107	IPC synthase (PI (1-16:1, 2-18:1) ceramide-1 (C24)) (No1)	3.55316e+06	59.04	409821
	P36107	IPC synthase (PI (1-18:0, 2-18:1) ceramide-1 (C24)) (No1)	3.55316e+06	59.04	409821
	P36107	IPC synthase (PI (1-18:1, 2-18:1) ceramide-1 (C24)) (No1)	3.55316e+06	59.04	409821
	P36107	IPC synthase (PI (1-16:0, 2-16:1) ceramide-1 (C26)) (No1)	3.55316e+06	59.04	409821
	P36107	IPC synthase (PI (1-16:1, 2-16:1) ceramide-1 (C26)) (No1)	3.55316e+06	59.04	409821
	P36107	IPC synthase (PI (1-18:0, 2-16:1) ceramide-1 (C26)) (No1)	3.55316e+06	59.04	409821
	P36107	IPC synthase (PI (1-18:1, 2-16:1) ceramide-1 (C26)) (No1)	3.55316e+06	59.04	409821
	P36107	IPC synthase (PI (1-16:0, 2-18:1) ceramide-1 (C26)) (No1)	3.55316e+06	59.04	409821
	P36107	IPC synthase (PI (1-16:1, 2-18:1) ceramide-1 (C26)) (No1)	3.55316e+06	59.04	409821
	P36107	IPC synthase (PI (1-18:0, 2-18:1) ceramide-1 (C26)) (No1)	3.55316e+06	59.04	409821
	P36107	IPC synthase (PI (1-18:1, 2-18:1) ceramide-1 (C26)) (No1)	3.55316e+06	59.04	409821
	P36107	IPC synthase (PI (1-16:0, 2-16:1) ceramide-2' (C24)) (No1)	3.55316e+06	59.04	409821
	P36107	IPC synthase (PI (1-16:1, 2-16:1) ceramide-2' (C24)) (No1)	3.55316e+06	59.04	409821
	P36107	IPC synthase (PI (1-18:0, 2-16:1) ceramide-2' (C24)) (No1)	3.55316e+06	59.04	409821
	P36107	IPC synthase (PI (1-18:1, 2-16:1) ceramide-2' (C24)) (No1)	3.55316e+06	59.04	409821
	P36107	IPC synthase (PI (1-16:0, 2-18:1) ceramide-2' (C24)) (No1)	3.55316e+06	59.04	409821
	P36107	IPC synthase (PI (1-16:1, 2-18:1) ceramide-2' (C24)) (No1)	3.55316e+06	59.04	409821
	P36107	IPC synthase (PI (1-18:0, 2-18:1) ceramide-2' (C24)) (No1)	3.55316e+06	59.04	409821
	P36107	IPC synthase (PI (1-18:1, 2-18:1) ceramide-2' (C24)) (No1)	3.55316e+06	59.04	409821
	P36107	IPC synthase (PI (1-16:0, 2-16:1) ceramide-2' (C26)) (No1)	3.55316e+06	59.04	409821
	P36107	IPC synthase (PI (1-16:1, 2-16:1) ceramide-2' (C26)) (No1)	3.55316e+06	59.04	409821
	P36107	IPC synthase (PI (1-18:0, 2-16:1) ceramide-2' (C26)) (No1)	3.55316e+06	59.04	409821
	P36107	IPC synthase (PI (1-18:1, 2-16:1) ceramide-2' (C26)) (No1)	3.55316e+06	59.04	409821
	P36107	IPC synthase (PI (1-16:0, 2-18:1) ceramide-2' (C26)) (No1)	3.55316e+06	59.04	409821
	P36107	IPC synthase (PI (1-16:1, 2-18:1) ceramide-2' (C26)) (No1)	3.55316e+06	59.04	409821
	P36107	IPC synthase (PI (1-18:0, 2-18:1) ceramide-2' (C26)) (No1)	3.55316e+06	59.04	409821
	P36107	IPC synthase (PI (1-18:1, 2-18:1) ceramide-2' (C26)) (No1)	3.55316e+06	59.04	409821
	P36107	IPC synthase (PI (1-16:0, 2-16:1) ceramide-2 (C24)) (No1)	3.55316e+06	59.04	409821
	P36107	IPC synthase (PI (1-16:1, 2-16:1) ceramide-2 (C24)) (No1)	3.55316e+06	59.04	409821
	P36107	IPC synthase (PI (1-18:0, 2-16:1) ceramide-2 (C24)) (No1)	3.55316e+06	59.04	409821
	P36107	IPC synthase (PI (1-18:1, 2-16:1) ceramide-2 (C24)) (No1)	3.55316e+06	59.04	409821
	P36107	IPC synthase (PI (1-16:0, 2-18:1) ceramide-2 (C24)) (No1)	3.55316e+06	59.04	409821
	P36107	IPC synthase (PI (1-16:1, 2-18:1) ceramide-2 (C24)) (No1)	3.55316e+06	59.04	409821
	P36107	IPC synthase (PI (1-18:0, 2-18:1) ceramide-2 (C24)) (No1)	3.55316e+06	59.04	409821
	P36107	IPC synthase (PI (1-18:1, 2-18:1) ceramide-2 (C24)) (No1)	3.55316e+06	59.04	409821
	P36107	IPC synthase (PI (1-16:0, 2-16:1) ceramide-2 (C26)) (No1)	3.55316e+06	59.04	409821
	P36107	IPC synthase (PI (1-16:1, 2-16:1) ceramide-2 (C26)) (No1)	3.55316e+06	59.04	409821
	P36107	IPC synthase (PI (1-18:0, 2-16:1) ceramide-2 (C26)) (No1)	3.55316e+06	59.04	409821
	P36107	IPC synthase (PI (1-18:1, 2-16:1) ceramide-2 (C26)) (No1)	3.55316e+06	59.04	409821
	P36107	IPC synthase (PI (1-16:0, 2-18:1) ceramide-2 (C26)) (No1)	3.55316e+06	59.04	409821
	P36107	IPC synthase (PI (1-16:1, 2-18:1) ceramide-2 (C26)) (No1)	3.55316e+06	59.04	409821
	P36107	IPC synthase (PI (1-18:0, 2-18:1) ceramide-2 (C26)) (No1)	3.55316e+06	59.04	409821
	P36107	IPC synthase (PI (1-18:1, 2-18:1) ceramide-2 (C26)) (No1)	3.55316e+06	59.04	409821
	P36107	IPC synthase (PI (1-16:0, 2-16:1) ceramide-3 (C24)) (No1)	3.55316e+06	59.04	409821
	P36107	IPC synthase (PI (1-16:1, 2-16:1) ceramide-3 (C24)) (No1)	3.55316e+06	59.04	409821
	P36107	IPC synthase (PI (1-18:0, 2-16:1) ceramide-3 (C24)) (No1)	3.55316e+06	59.04	409821
	P36107	IPC synthase (PI (1-18:1, 2-16:1) ceramide-3 (C24)) (No1)	3.55316e+06	59.04	409821
	P36107	IPC synthase (PI (1-16:0, 2-18:1) ceramide-3 (C24)) (No1)	3.55316e+06	59.04	409821
	P36107	IPC synthase (PI (1-16:1, 2-18:1) ceramide-3 (C24)) (No1)	3.55316e+06	59.04	409821
	P36107	IPC synthase (PI (1-18:0, 2-18:1) ceramide-3 (C24)) (No1)	3.55316e+06	59.04	409821
	P36107	IPC synthase (PI (1-18:1, 2-18:1) ceramide-3 (C24)) (No1)	3.55316e+06	59.04	409821
	P36107	IPC synthase (PI (1-16:0, 2-16:1) ceramide-3 (C26)) (No1)	3.55316e+06	59.04	409821
	P36107	IPC synthase (PI (1-16:1, 2-16:1) ceramide-3 (C26)) (No1)	3.55316e+06	59.04	409821
	P36107	IPC synthase (PI (1-18:0, 2-16:1) ceramide-3 (C26)) (No1)	3.55316e+06	59.04	409821
	P36107	IPC synthase (PI (1-18:1, 2-16:1) ceramide-3 (C26)) (No1)	3.55316e+06	59.04	409821
	P36107	IPC synthase (PI (1-16:0, 2-18:1) ceramide-3 (C26)) (No1)	3.55316e+06	59.04	409821
	P36107	IPC synthase (PI (1-16:1, 2-18:1) ceramide-3 (C26)) (No1)	3.55316e+06	59.04	409821
	P36107	IPC synthase (PI (1-18:0, 2-18:1) ceramide-3 (C26)) (No1)	3.55316e+06	59.04	409821
	P36107	IPC synthase (PI (1-18:1, 2-18:1) ceramide-3 (C26)) (No1)	3.55316e+06	59.04	409821
	P36107	IPC synthase (PI (1-16:0, 2-16:1) ceramide-4 (C24)) (No1)	3.55316e+06	59.04	409821
	P36107	IPC synthase (PI (1-16:1, 2-16:1) ceramide-4 (C24)) (No1)	3.55316e+06	59.04	409821
	P36107	IPC synthase (PI (1-18:0, 2-16:1) ceramide-4 (C24)) (No1)	3.55316e+06	59.04	409821
	P36107	IPC synthase (PI (1-18:1, 2-16:1) ceramide-4 (C24)) (No1)	3.55316e+06	59.04	409821
	P36107	IPC synthase (PI (1-16:0, 2-18:1) ceramide-4 (C24)) (No1)	3.55316e+06	59.04	409821
	P36107	IPC synthase (PI (1-16:1, 2-18:1) ceramide-4 (C24)) (No1)	3.55316e+06	59.04	409821
	P36107	IPC synthase (PI (1-18:0, 2-18:1) ceramide-4 (C24)) (No1)	3.55316e+06	59.04	409821
	P36107	IPC synthase (PI (1-18:1, 2-18:1) ceramide-4 (C24)) (No1)	3.55316e+06	59.04	409821
	P36107	IPC synthase (PI (1-16:0, 2-16:1) ceramide-4 (C26)) (No1)	3.55316e+06	59.04	409821
	P36107	IPC synthase (PI (1-16:1, 2-16:1) ceramide-4 (C26)) (No1)	3.55316e+06	59.04	409821
	P36107	IPC synthase (PI (1-18:0, 2-16:1) ceramide-4 (C26)) (No1)	3.55316e+06	59.04	409821
	P36107	IPC synthase (PI (1-18:1, 2-16:1) ceramide-4 (C26)) (No1)	3.55316e+06	59.04	409821
	P36107	IPC synthase (PI (1-16:0, 2-18:1) ceramide-4 (C26)) (No1)	3.55316e+06	59.04	409821
	P36107	IPC synthase (PI (1-16:1, 2-18:1) ceramide-4 (C26)) (No1)	3.55316e+06	59.04	409821
	P36107	IPC synthase (PI (1-18:0, 2-18:1) ceramide-4 (C26)) (No1)	3.55316e+06	59.04	409821
	P36107	IPC synthase (PI (1-18:1, 2-18:1) ceramide-4 (C26)) (No1)	3.55316e+06	59.04	409821
	P40099	5-formethyltetrahydrofolate cyclo-ligase (No1)	3599.97	42.12	750601
	P40099	5-formyltetrahydrofolate:10-formyltetrahydrofolate isomerase (No1)	3599.97	42.12	750601
	P53615	bicarbonate formation (No1)	3.38398e+09	750.6	6.47932e+09
	Q12055	deoxyadenylate kinase (No1)	90000.9	46.8	2.01938e+06
	Q12447	diamine transaminase (No1)	5760.04	152.64	643386
	P38913	FMN adenylyltransferase (No1)	2.9808	18	823100
	P53727	pyridoxal kinase (No1)	471609	462.24	739304
	P52290	thiamin phosphatase (No1)	3.34459e+06	810.72	1.15136e+06
	P39713	(R)-Acetoin:NAD+ oxidoreductase (No1)	539986	272.16	365764
	P39713	Probable diacetyl reductase [(R)-acetoin forming] 2 (EC 1.1.1.303) (No1)	539986	272.16	365764
	P33893	Glutamyl-tRNA(Gln) amidotransferase subunit B, mitochondrial (Glu-AdT subunit B) (EC 6.3.5.-) (Cytochrome c oxidase assembly factor PET112) (No1)	23039.9	185.04	510351
	P38137	oxalate:CoA ligase (AMP-forming) (No1)	216001	517.32	292784
	P38360	P-type cation-transporting ATPase (EC 3.6.3.3) (Cadmium resistance protein 2) (Cadmium-translocating P-type ATPase) (Cd(2+)-exporting ATPase) (No1)	90000.9	3090.96	101470
	P25612	Putative aryl-alcohol dehydrogenase AAD3 (EC 1.1.1.-) (No1)	4.29111e+07	91.08	181107
	Q07747	Putative aryl-alcohol dehydrogenase AAD3 (EC 1.1.1.-) (No2)	4.29111e+07	91.08	181107
	P47182	Putative aryl-alcohol dehydrogenase AAD3 (EC 1.1.1.-) (No3)	4.29111e+07	91.08	181107
	P42884	Putative aryl-alcohol dehydrogenase AAD3 (EC 1.1.1.-) (No4)	4.29111e+07	91.08	181107
	Q08361	Putative aryl-alcohol dehydrogenase AAD3 (EC 1.1.1.-) (No5)	4.29111e+07	91.08	181107
	Q02895	Putative aryl-alcohol dehydrogenase AAD3 (EC 1.1.1.-) (No6)	4.29111e+07	91.08	181107
	P25612	Putative aryl-alcohol dehydrogenase AAD3 (EC 1.1.1.-) (No1)	4.29111e+07	91.08	181107
	Q07747	Putative aryl-alcohol dehydrogenase AAD3 (EC 1.1.1.-) (No2)	4.29111e+07	91.08	181107
	P47182	Putative aryl-alcohol dehydrogenase AAD3 (EC 1.1.1.-) (No3)	4.29111e+07	91.08	181107
	P42884	Putative aryl-alcohol dehydrogenase AAD3 (EC 1.1.1.-) (No4)	4.29111e+07	91.08	181107
	Q08361	Putative aryl-alcohol dehydrogenase AAD3 (EC 1.1.1.-) (No5)	4.29111e+07	91.08	181107
	Q02895	Putative aryl-alcohol dehydrogenase AAD3 (EC 1.1.1.-) (No6)	4.29111e+07	91.08	181107
	P25612	Putative aryl-alcohol dehydrogenase AAD3 (EC 1.1.1.-) (No1)	4.29111e+07	91.08	181107
	Q07747	Putative aryl-alcohol dehydrogenase AAD3 (EC 1.1.1.-) (No2)	4.29111e+07	91.08	181107
	P47182	Putative aryl-alcohol dehydrogenase AAD3 (EC 1.1.1.-) (No3)	4.29111e+07	91.08	181107
	P42884	Putative aryl-alcohol dehydrogenase AAD3 (EC 1.1.1.-) (No4)	4.29111e+07	91.08	181107
	Q08361	Putative aryl-alcohol dehydrogenase AAD3 (EC 1.1.1.-) (No5)	4.29111e+07	91.08	181107
	Q02895	Putative aryl-alcohol dehydrogenase AAD3 (EC 1.1.1.-) (No6)	4.29111e+07	91.08	181107
	P25612	Putative aryl-alcohol dehydrogenase AAD3 (EC 1.1.1.-) (No1)	518403	91.08	181107
	Q07747	Putative aryl-alcohol dehydrogenase AAD3 (EC 1.1.1.-) (No2)	518403	91.08	181107
	P47182	Putative aryl-alcohol dehydrogenase AAD3 (EC 1.1.1.-) (No3)	518403	91.08	181107
	P42884	Putative aryl-alcohol dehydrogenase AAD3 (EC 1.1.1.-) (No4)	518403	91.08	181107
	Q08361	Putative aryl-alcohol dehydrogenase AAD3 (EC 1.1.1.-) (No5)	518403	91.08	181107
	Q02895	Putative aryl-alcohol dehydrogenase AAD3 (EC 1.1.1.-) (No6)	518403	91.08	181107
	P25612	Putative aryl-alcohol dehydrogenase AAD3 (EC 1.1.1.-) (No1)	4.29111e+07	91.08	181107
	Q07747	Putative aryl-alcohol dehydrogenase AAD3 (EC 1.1.1.-) (No2)	4.29111e+07	91.08	181107
	P47182	Putative aryl-alcohol dehydrogenase AAD3 (EC 1.1.1.-) (No3)	4.29111e+07	91.08	181107
	P42884	Putative aryl-alcohol dehydrogenase AAD3 (EC 1.1.1.-) (No4)	4.29111e+07	91.08	181107
	Q08361	Putative aryl-alcohol dehydrogenase AAD3 (EC 1.1.1.-) (No5)	4.29111e+07	91.08	181107
	Q02895	Putative aryl-alcohol dehydrogenase AAD3 (EC 1.1.1.-) (No6)	4.29111e+07	91.08	181107
	P25612	Benzyl alcohol:NAD+ oxidoreductase (No1)	322924	91.08	181107
	Q07747	Benzyl alcohol:NAD+ oxidoreductase (No2)	322924	91.08	181107
	P47182	Benzyl alcohol:NAD+ oxidoreductase (No3)	322924	91.08	181107
	P42884	Benzyl alcohol:NAD+ oxidoreductase (No4)	322924	91.08	181107
	Q08361	Benzyl alcohol:NAD+ oxidoreductase (No5)	322924	91.08	181107
	Q02895	Benzyl alcohol:NAD+ oxidoreductase (No6)	322924	91.08	181107
	P39986	Manganese-transporting ATPase 1 (EC 3.6.3.-) (No1)	90000.9	154.8	562011
	P0CX08	D-Mannitol:NAD+ 2-oxidoreductase (No1)	4.29111e+07	4660.92	328527
	P0CX09	D-Mannitol:NAD+ 2-oxidoreductase (No2)	4.29111e+07	4660.92	328527
	P40011	4-hydroxy-4-methyl-2-oxoglutarate pyruvate-lyase (pyruvate-forming) (No1)	99.3641	294.84	3.15748e+06
	P40011	oxaloacetate carboxy-lyase (pyruvate-forming) (No1)	2.7e+07	220.32	9.6608e+06
	P39965	L-proline:tRNA(Pro) ligase (AMP-forming) (No1)	20160.1	226.08	587979
	P38744	4a-hydroxytetrahydrobiopterin hydro-lyase (No1)	86400.6	13.68	1.03695e+08
	P38818	Cytochrome c lysine N-methyltransferase 1 (EC 2.1.1.59) (No1)	0.680921	169.92	221082
	P38827	S-Adenosyl-L-methionine:histone-L-lysine N6-methyltransferase (No1)	136.801	972	100396
	Q04089	S-Adenosyl-L-methionine:histone-L-lysine N6-methyltransferase (No2)	136.801	318.24	277742
	P46995	S-Adenosyl-L-methionine:histone-L-lysine N6-methyltransferase (No3)	136.801	326.52	118842
	P38626	NADH:ferricytochrome-b5 oxidoreductase (No1)	3.95993e+06	241.2	889479
	Q12746	NADH:ferricytochrome-b5 oxidoreductase (No2)	3.95993e+06	241.2	889479
	P38626	NADH-cytochrome b5 reductase 1 (EC 1.6.2.2) (Microsomal cytochrome b reductase) (P35) (No1)	3.95993e+06	241.2	889479
	P36060	NADH-cytochrome b5 reductase 1 (EC 1.6.2.2) (Microsomal cytochrome b reductase) (P35) (No2)	3.95993e+06	241.2	889479
	Q12746	NADH-cytochrome b5 reductase 1 (EC 1.6.2.2) (Microsomal cytochrome b reductase) (P35) (No3)	3.95993e+06	241.2	889479
	P40580	Benzil reductase ((S)-benzoin forming) IRC24 (EC 1.1.1.320) (Increased recombination centers protein 24) (No1)	9900.01	85.68	335909
	P28273	5-oxo-L-proline amidohydrolase (ATP-hydrolysing) (No1)	421.195	4157.64	140012
	P36007	threo-3-hydroxy-L-aspartate ammonia-lyase (No1)	84238.9	1985.4	95778.4
	P0CH63	urea hydro-lyase (cyanamide-forming) (No1)	3.38398e+09	3.96	3.50754e+07
	P0CH64	urea hydro-lyase (cyanamide-forming) (No2)	3.38398e+09	3.96	3.50754e+07
	P43544	D-ribose 5-phosphate,D-glyceraldehyde 3-phosphate pyridoxal 5-phosphate-lyase (glutamine-hydrolyzing) (No1)	2.24962e+07	193.68	425870
	P53823	D-ribose 5-phosphate,D-glyceraldehyde 3-phosphate pyridoxal 5-phosphate-lyase (glutamine-hydrolyzing) (No2)	2.24962e+07	193.68	425870
	P43545	D-ribulose 5-phosphate,D-glyceraldehyde 3-phosphate pyridoxal 5-phosphate-lyase (No1)	457.206	193.68	425870
	P53824	D-ribulose 5-phosphate,D-glyceraldehyde 3-phosphate pyridoxal 5-phosphate-lyase (No2)	457.206	193.68	425870
	P43616	L-cysteinylglycine dipeptidase (No1)	1.1988e+08	1476.72	305830
	P19881	4-nitrophenyl phosphate phosphohydrolase (No1)	388802	53.64	507452
	Q07786	D-Iditol:NAD+ 2-oxidoreductase (No1)	579609	91.08	181107
	Q12691	Sodium transport ATPase 5 (EC 3.6.3.7) (No1)	623986	3520.08	157434
	Q01896	Sodium transport ATPase 5 (EC 3.6.3.7) (No2)	623986	3520.08	157434
	P13587	Sodium transport ATPase 5 (EC 3.6.3.7) (No3)	623986	3520.08	157434
	Q99288	Broad-range acid phosphatase DET1 (EC 3.1.3.-) (Decreased ergosterol transport protein 1) (No1)	676819	1529.28	9.53424e+06
	P52892	L-Alanine:2-oxoglutarate aminotransferase (No1)	21924.1	1297.8	2.84281e+06
	P22580	2-phenylacetamide amidohydrolase (No1)	2.59774e+07	748.44	1.48318e+06
	P22580	Indole-3-acetamide amidohydrolase (No1)	2.59774e+07	34.56	611667
	P22580	Acylamide aminohydrolase (No1)	4.29111e+06	29.52	101455
	Q03786	ATP:D-Gluconate 6-phosphotransferase (No1)	34199.7	54	1.75525e+06
	P32584	S-Adenosyl-L-methionine:protein-C-terminal-S-farnesyl-L-cysteine O-methyltransferase (No1)	4500.05	52.56	1.26341e+06
	Q04409	ATP:D-glucose 6-phosphotransferase (No1)	5.37115e+06	260.28	116315
	P38929	Calcium-transporting ATPase 2 (EC 3.6.3.8) (Vacuolar Ca(2+)-ATPase) (No1)	467990	2220.12	61611.1
	P13586	Calcium-transporting ATPase 2 (EC 3.6.3.8) (Golgi Ca(2+)-ATPase) (No1)	467990	2220.12	61611.1
	P32579	ATP:L-threonyl,bicarbonate adenylyltransferase (No1)	87842.6	189.36	544470
	P53095	D-serine ammonia-lyase (No1)	61199.5	204.84	186657
	P53206	O3-acetyl-L-serine:hydrogen-sulfide 2-amino-2-carboxyethyltransferase; O3-acetyl-L-serine acetate-lyase (adding hydrogen sulfide) (No1)	835213	1311.12	2.91537e+06
	P53230	CTP:phosphatidate cytidyltransferase (No1)	32112	151.92	1.61466e+06
	P32318	Thiamine thiazole synthase (Thiazole biosynthetic enzyme) (No1)	10440	510.12	271683
	P39676	nitric oxide, NADPH2:oxygen oxidoreductase (No1)	298802	411.48	811763
	P47051	Putative lipoate-protein ligase A (EC 6.3.1.20) (Altered inheritance rate of mitochondria protein 22) (No1)	478.79	238.68	493384
	P47051	[lipoyl-carrier protein]-L-lysine:lipoate ligase (AMP-forming) (No1)	478.79	238.68	493384
	P21375	succinate:NAD+ oxidoreductase (No1)	2.36883e+06	345.96	2.87662e+06
	P47119	Inosine triphosphate pyrophosphatase (ITPase) (Inosine triphosphatase) (EC 3.6.1.9) (Hydroxylaminopurine sensitivity protein 1) (Non-canonical purine NTP pyrophosphatase) (Non-standard purine NTP pyrophosphatase) (Nucleoside-triphosphate diphosphatase) (Nucleoside-triphosphate pyrophosphatase) (NTPase) (No1)	1.6164e+06	51.84	664384
	P47119	2'-Deoxyguanosine 5'-triphosphate diphosphohydrolase (No1)	1.6164e+06	27.72	475117
	P47119	dTTP diphosphohydrolase (No1)	154801	81	725789
	Q04533	O-Succinyl-L-homoserine succinate-lyase (deaminating; 2-oxobutanoate-forming) (No2)	435597	2019.6	101164
	Q12429	diphthine:ammonia ligase (AMP-forming) (No1)	189721	334.08	4.16034e+06
	Q06137	ATP:D-fructose-6-phosphate 2-phosphotransferase (No1)	1609.19	1255.68	2.03242e+06
	Q06204	ATP:D-fructose 6-phosphotransferase (No1)	224281	82.44	438702
	Q06204	ATP:beta-D-glucose 6-phosphotransferase (No1)	224281	82.44	438702
	Q06204	ATP:alpha-D-glucose 6-phosphotransferase (No1)	224281	82.44	438702
	Q06204	ATP:D-glucosamine 6-phosphotransferase (No1)	224281	82.44	438702
	Q06204	ATP:D-fructose 6-phosphotransferase (No1)	224281	82.44	438702
	Q04458	D-Glyceraldehyde:NAD+ oxidoreductase (No1)	243002	2096.28	310043
	Q04458	4-aminobutanal:NAD+ 1-oxidoreductase; 4-aminobutyraldehyde:NAD+ oxidoreductase (No1)	243002	2096.28	310043
	Q04458	Indole-3-acetaldehyde:NAD+ oxidoreductase (No1)	243002	2096.28	310043
	Q04458	2-Propyn-1-al:NAD+ oxidoreductase (No1)	243002	2096.28	310043
	Q04458	D-Glucuronolactone:NAD+ oxidoreductase (No1)	243002	2096.28	310043
	Q04458	4-Trimethylammoniobutanal:NAD+ 1-oxidoreductase; 4-Trimethylammoniobutanal:NAD+ oxidoreductase (No1)	243002	2096.28	310043
	Q04458	(S)-Methylmalonate semialdehyde:NAD+ oxidoreductase (No1)	243002	2096.28	310043
	Q04458	Imidazole acetaldehyde:NAD+ oxidoreductase (No1)	243002	2096.28	310043
	Q04458	3alpha,7alpha-Dihydroxy-5beta-cholestan-26-al:NAD+ oxidoreductase (No1)	243002	2096.28	310043
	Q04458	5-Hydroxyindoleacetaldehyde:NAD+ oxidoreductase (No1)	243002	2096.28	310043
	Q04458	N4-Acetylaminobutanal:NAD+ oxidoreductase (No1)	243002	2096.28	310043
	Q04458	Chloroacetaldehyde:NAD+ oxidoreductase (No1)	243002	2096.28	310043
	Q04458	Aldehyde:NAD+ oxidoreductase (No1)	243002	2096.28	310043
	Q04458	farnesal:NAD+ oxidoreductase (No1)	243002	2096.28	310043
	Q12674	Probable phospholipid-transporting ATPase DNF3 (EC 3.6.3.1) (Aminophospholipid translocase) (APT) (Phospholipid translocase) (PLT) (No1)	459010	2973.96	81580
	P53934	S-adenosyl-L-methionine:carnosine N-methyltransferase (No1)	280.796	186.12	438080
	P32875	protein N6-(octanoyl)lysine:sulfur sulfurtransferase (No1)	493559	155.88	198648
	P32875	octanoyl-[acp]:sulfur sulfurtransferase (No1)	493559	155.88	198648
	Q06494	Pyridoxine:NADP+ 4-oxidoreductase (No1)	4.29111e+07	36.72	328037
	P38995	Copper-transporting ATPase (EC 3.6.3.54) (Cu(2+)-ATPase) (No1)	90000.9	3709.08	250391
	Q04119	Endopolyphosphatase (EC 3.6.1.10) (Deoxyadenosine triphosphate phosphohydrolase) (dATP phosphohydrolase) (EC 3.6.1.-) (Exopolyphosphatase) (EC 3.6.1.11) (Phosphate metabolism protein 5) (No1)	5.58005e+06	418.68	381189
	P38698	Triphosphate phosphohydrolase (No1)	12455.9	91.44	330909
	Q04119	Triphosphate phosphohydrolase (No2)	471609	584.64	704698
	Q12675	O-Phosphoryl-Ethanolamine transport in via proton symport (No1)	459010	1104.12	99026.6
	P47164	O4-succinyl-L-homoserine:hydrogen sulfide S-(3-amino-3-carboxypropyl)transferase; O-succinyl-L-homoserine succinate-lyase (adding hydrogen sulfide) (No1)	435597	2019.6	101164
	Q04533	O4-succinyl-L-homoserine:hydrogen sulfide S-(3-amino-3-carboxypropyl)transferase; O-succinyl-L-homoserine succinate-lyase (adding hydrogen sulfide) (No3)	435597	2019.6	101164
	P07275	1-pyrroline-5-carboxylate dehydrogenase (reversible) (No1)	5399.86	142.2	486852
	P47039	2-aminoadipate transaminase (reversible) (No3)	27612.1	804.24	1.45911e+06
	P49367	2-methylcitrate dehydratase (reversible) (No1)	9000.09	3987	9.40564e+06
	P07264	3-isopropylmalate dehydratase (reversible) (No1)	33372.3	936.36	1.06364e+06
	Q06685	4PP-IP5 depyrophosphorylation to IP6 (reversible) (No1)	136801	636.12	236861
	Q99321	4PP-IP5 depyrophosphorylation to IP6 (reversible) (No2)	2880.02	16.92	8.38674e+06
	Q06685	6PP-IP5 depyrophosphorylation to IP6 (reversible) (No1)	136801	636.12	236861
	Q99321	6PP-IP5 depyrophosphorylation to IP6 (reversible) (No2)	2880.02	16.92	8.38674e+06
	P25628	acyl-CoA:sterol acyltransferase (oleoyl-CoA:episterol), ER membrane (reversible) (No1)	3.71747e+07	85.32	905890
	P25628	acyl-CoA:sterol acyltransferase (oleoyl-CoA:ergosterol), ER membrane (reversible) (No1)	3.71747e+07	85.32	905890
	P53629	acyl-CoA:sterol acyltransferase (oleoyl-CoA:ergosterol), ER membrane (reversible) (No2)	3.71747e+07	85.32	905890
	P25628	acyl-CoA:sterol acyltransferase (oleoyl-CoA:fecosterol), ER membrane (reversible) (No1)	3.71747e+07	85.32	905890
	P25628	acyl-CoA:sterol acyltransferase (oleoyl-CoA:lanosterol), ER membrane (reversible) (No1)	3.71747e+07	85.32	905890
	P25628	acyl-CoA:sterol acyltransferase (oleoyl-CoA:zymosterol), ER membrane (reversible) (No1)	3.71747e+07	85.32	905890
	P25628	acyl-CoA:sterol acyltransferase (palmitoleoyl-CoA:episterol), ER membrane (reversible) (No1)	3.71747e+07	85.32	905890
	P25628	acyl-CoA:sterol acyltransferase (palmitoleoyl-CoA:ergosterol), ER membrane (reversible) (No1)	3.71747e+07	85.32	905890
	P53629	acyl-CoA:sterol acyltransferase (palmitoleoyl-CoA:ergosterol), ER membrane (reversible) (No2)	3.71747e+07	85.32	905890
	P25628	acyl-CoA:sterol acyltransferase (palmitoleoyl-CoA:fecosterol), ER membrane (reversible) (No1)	3.71747e+07	85.32	905890
	P25628	acyl-CoA:sterol acyltransferase (palmitoleoyl-CoA:lanosterol), ER membrane (reversible) (No1)	3.71747e+07	85.32	905890
	P25628	acyl-CoA:sterol acyltransferase (palmitoleoyl-CoA:zymosterol), ER membrane (reversible) (No1)	3.71747e+07	85.32	905890
	P47026	acylation of GPI inositol at 2 position, GPI-anchor assembly, step 3 (reversible) (No1)	18828.1	82.08	1.82053e+06
	P50277	adenosylmethionine-8-amino-7-oxononanoate transaminase (reversible) (No1)	4.32003	3697.56	290315
	P26364	adenylate kinase (GTP) (reversible) (No1)	421195	69.12	3.07887e+06
	P25335	allantoate amidinohydrolase (reversible) (No1)	2.7e+06	11047.3	5.48018e+08
	P32375	allantoinase, reaction (reversible) (No1)	1.51199e+06	14166	5.62407e+06
	P49775	Ap4A hydrolase (reversible) (No1)	2475	108	1.35885e+06
	P22768	argininosuccinate synthase (reversible) (No1)	62107.9	555.84	272259
	P23542	aspartate transaminase (reversible) (No1)	2.06641e+06	668.16	656961
	P23542	aspartate transaminase (reversible) (No1)	2.06641e+06	668.16	656961
	P32451	biotin synthase (reversible) (No1)	1.98	66.96	198403
	P22007	CAAX farnesyltransferase (reversible) (No1)	4681.87	57.96	498482
	P29703	CAAX farnesyltransferase (reversible) (No1)	4681.87	57.96	498482
	P35196	cis-prenyltransferase step 14 (reversible) (No1)	11880	24.84	2.41268e+06
	Q03175	cis-prenyltransferase step 14 (reversible) (No2)	11880	24.84	2.41268e+06
	P35196	cis-prenyltransferase step 15 (reversible) (No1)	11880	24.84	2.41268e+06
	Q03175	cis-prenyltransferase step 15 (reversible) (No2)	11880	24.84	2.41268e+06
	P06773	dCMP deaminase (reversible) (No1)	5.04007e+06	13.68	2.28119e+06
	P15454	deoxyguanylate kinase (dGMP:ATP) (reversible) (No1)	1.4184e+06	471.6	2.39113e+06
	P53630	dethiobiotin synthase (reversible) (No1)	5.04007	144	1.13604e+06
	Q02896	dihydroceramidase (reversible) (No1)	579609	163.44	576848
	Q02896	dihydroceramidase (reversible) (No1)	579609	163.44	580446
	P20051	dihydroorotase (reversible) (No1)	8927.77	687.96	8.2102e+06
	P00950	diphosphoglyceromutase (reversible) (No1)	2.07361e+06	175.32	1.86586e+06
	P0CX11	enolase (reversible) (No1)	122653	3639.6	272962
	P00924	enolase (reversible) (No2)	828000	3639.6	272962
	P00925	enolase (reversible) (No3)	255598	3639.6	272962
	P42222	enolase (reversible) (No4)	122653	3639.6	272962
	P0CX10	enolase (reversible) (No5)	122653	3639.6	272962
	P39518	fatty-acid--CoA ligase (decanoate) (reversible) (No1)	1261.5	915.12	322463
	P39518	fatty-acid--CoA ligase (dodecanoate) (reversible) (No1)	1261.5	915.12	322463
	P39518	fatty-acid--CoA ligase (hexadecanoate) (reversible) (No1)	1261.5	915.12	322463
	P39518	fatty-acid--CoA ligase (octanoate) (reversible) (No1)	1261.5	915.12	322463
	P39518	fatty-acid--CoA ligase (tetradecanoate) (reversible) (No1)	1261.5	915.12	322463
	P14540	fructose-bisphosphate aldolase (reversible) (No1)	117000	164.52	93249.4
	P08417	fumarase (reversible) (No1)	3.72606e+06	624.6	200577
	P08417	fumarase, cytoplasmic (reversible) (No1)	3.72606e+06	624.6	200577
	P32614	fumarate reductase (reversible) (No1)	55438.5	345.96	2.87662e+06
	P32614	soluble fumarate reductase (reversible) (No1)	55438.5	345.96	2.87662e+06
	P12709	glucose-6-phosphate isomerase (reversible) (No1)	2.46597e+06	1634.4	563773
	P00359	glyceraldehyde-3-phosphate dehydrogenase (reversible) (No1)	32760	3690	747866
	P00360	glyceraldehyde-3-phosphate dehydrogenase (reversible) (No2)	104400	3690	747866
	P00358	glyceraldehyde-3-phosphate dehydrogenase (reversible) (No3)	60120	3690	747866
	P37291	glycine hydroxymethyltransferase (reversible) (No1)	56879.6	97.2	258291
	P37292	glycine hydroxymethyltransferase (reversible) (No1)	56879.6	97.2	258291
	P23797	GPI-anchor assembly, step 2 (reversible) (No1)	170640	232.2	5.24137e+06
	P47088	GPI-anchor assembly, step 5 (reversible) (No1)	255239	24.12	219363
	P38211	GPI-anchor assembly, step 7 (reversible) (No1)	255239	89.64	4.75123e+06
	P15454	guanylate kinase (GMP:dATP) (reversible) (No1)	1.4184e+06	188.64	1.43924e+06
	P39533	homoacontinate hydratase (reversible) (No1)	3.38398e+09	4412.52	284897
	P49367	homoacontinate hydratase (reversible) (No2)	9000.09	636.84	293624
	P41939	isocitrate dehydrogenase (NADP) (reversible) (No1)	259202	25172.3	25172.3
	P47176	isoleucine transaminase (reversible) (No1)	3.86997e+06	444.6	764180
	P38891	isoleucine transaminase (reversible) (No1)	3.86997e+06	444.6	764180
	P15496	isopentenyl-diphosphate D-isomerase (reversible) (No1)	218.107	137.52	584052
	P53312	itaconate-CoA ligase (ADP-forming) (reversible) (No1)	79201.6	29.52	1.75068e+06
	P53598	itaconate-CoA ligase (ADP-forming) (reversible) (No1)	79201.6	29.52	1.75068e+06
	P07275	L-1-pyrroline-3-hydroxy-5-carboxylate dehydrogenase (reversible) (No1)	5399.86	142.2	486852
	P07275	L-4-hydroxyglutamate semialdehyde dehydrogenase (reversible) (No1)	5399.86	142.2	486852
	P52893	L-alanine transaminase (reversible) (No1)	31104.2	1129.68	1.78399e+06
	P47176	leucine transaminase (reversible) (No1)	3.86997e+06	444.6	764180
	P38891	leucine transaminase (reversible) (No1)	3.86997e+06	444.6	764180
	Q10740	leukotriene A4 hydrolase (reversible) (No1)	18719.9	1698.12	2.52532e+06
	Q10740	leukotriene A4 hydrolase (reversible) (No1)	18719.9	1698.12	2.52532e+06
	Q10740	leukotriene A4 hydrolase (reversible) (No1)	18719.9	1093.32	2.35876e+06
	Q10740	leukotriene A4 hydrolase (reversible) (No1)	18719.9	1093.32	2.35876e+06
	P17505	malate dehydrogenase (reversible) (No1)	685448	2909.52	1.67406e+07
	P22133	malate dehydrogenase, cytoplasmic (reversible) (No1)	3.08518e+07	2909.52	1.67406e+07
	P32419	malate dehydrogenase, peroxisomal (reversible) (No1)	3.08518e+07	2909.52	1.67406e+07
	P29952	mannose-6-phosphate isomerase (reversible) (No1)	507588	248.4	408219
	P40360	N-acteylglutamate synthase (reversible) (No1)	2807.96	20.88	402472
	Q04728	N-acteylglutamate synthase (reversible) (No2)	75238.9	20.88	402472
	P38795	NAD synthase (reversible) (No1)	23039.9	350.64	166105
	P36010	nucleoside diphosphate kinase (reversible) (No1)	47879	102.24	1.90718e+06
	P36010	nucleoside diphosphate kinase (reversible) (No1)	47879	102.24	1.90718e+06
	Q04533	O-succinylhomoserine lyase (L-cysteine) (reversible) (No2)	435597	513.36	269653
	P31373	O-succinylhomoserine lyase (L-cysteine) (reversible) (No3)	6515.93	213.48	133568
	P13298	orotate phosphoribosyltransferase (reversible) (No1)	38880.2	53.28	327632
	P30402	orotate phosphoribosyltransferase (reversible) (No2)	38880.2	53.28	327632
	P38628	phosphoacetylglucosamine mutase (reversible) (No1)	10584	1371.96	175484
	P00560	phosphoglycerate kinase (reversible) (No1)	1.93211e+06	7545.24	462672
	Q12040	phosphoglycerate mutase (reversible) (No1)	2.99877e+06	47.16	2.69616e+06
	P00950	phosphoglycerate mutase (reversible) (No2)	2.07361e+06	117.36	1.41881e+06
	Q05788	guanosine phosphorylase (reversible) (No1)	568796	444.96	1.58368e+06
	Q05788	guanosine phosphorylase (reversible) (No1)	568796	444.96	1.58368e+06
	Q05788	inosine phosphorylase (reversible) (No1)	457206	444.96	1.58368e+06
	P38075	pyridoxine 5'-phosphate oxidase (reversible) (No1)	118800	757.44	1.92466e+08
	P46969	ribulose 5-phosphate 3-epimerase (reversible) (No1)	408597	2583.36	1.31976e+08
	P40363	S-formylglutathione hydralase (reversible) (No1)	417606	2594.88	123069
	P32614	fumarate reductase (FMN) (reversible) (No1)	55438.5	345.96	2.87662e+06
	P21801	succinate dehydrogenase (ubiquinone-6) (reversible) (No1)	286558	63.72	96115
	P47052	succinate dehydrogenase (ubiquinone-6) (reversible) (No1)	286558	63.72	96115
	P21801	succinate dehydrogenase (ubiquinone-6) (reversible) (No2)	286558	63.72	96115
	Q00711	succinate dehydrogenase (ubiquinone-6) (reversible) (No2)	286558	63.72	96115
	P21801	succinate dehydrogenase (ubiquinone-6) (reversible) (No3)	286558	63.72	96115
	P47052	succinate dehydrogenase (ubiquinone-6) (reversible) (No3)	286558	63.72	96115
	P36001	tetrahydrofolate:L-glutamate gamma-ligase (ADP-forming) (reversible) (No1)	7199.94	99	218573
	Q08645	tetrahydrofolate:L-glutamate gamma-ligase (ADP-forming) (reversible) (No2)	7199.94	99	218573
	P53228	transaldolase (reversible) (No1)	82440.2	278.28	234027
	P15019	transaldolase (reversible) (No2)	270000	278.28	234027
	P33315	transketolase 2 (reversible) (No1)	248398	284.04	255060
	P23254	transketolase 2 (reversible) (No2)	248398	284.04	255060
	P43123	UDP-N-acetylglucosamine diphosphorylase (reversible) (No1)	30239.8	46.44	254706
	P38709	UTP-glucose-1-phosphate uridylyltransferase (reversible) (No1)	22859.8	156.24	224899
	P32861	UTP-glucose-1-phosphate uridylyltransferase (reversible) (No2)	97200.6	156.24	224899
	P31115	yUMP synthetase (reversible) (No1)	1.2996e+06	175.32	137259
	P53167	yUMP synthetase (reversible) (No2)	1.2996e+06	9154.8	159072
	P48567	yUMP synthetase (reversible) (No3)	2807.96	446.76	281659
	Q12211	yUMP synthetase (reversible) (No4)	1.2996e+06	3284.64	255195
	P47039	kynurenine aminotransferase (reversible) (No1)	5.54385e+06	1260.72	504926
	P38840	tyrosine transaminase (reversible) (No1)	1.79999e+06	812.88	1.31692e+06
	P30624	fatty-acid--CoA ligase (dodecanoate), ER membrane (reversible) (No1)	1261.5	915.12	322463
	P47912	fatty-acid--CoA ligase (tetradecanoate), ER membrane (reversible) (No1)	1261.5	915.12	322463
	P30624	fatty-acid--CoA ligase (tetradecanoate), ER membrane (reversible) (No2)	1261.5	915.12	322463
	P47912	fatty-acid--CoA ligase (hexadecanoate), ER membrane (reversible) (No1)	1261.5	915.12	322463
	P30624	fatty-acid--CoA ligase (hexadecanoate), ER membrane (reversible) (No2)	1261.5	915.12	322463
	P47912	fatty-acid--CoA ligase (hexadecenoate), ER membrane (reversible) (No1)	1261.5	915.12	322463
	P30624	fatty-acid--CoA ligase (hexadecenoate), ER membrane (reversible) (No2)	1261.5	915.12	322463
	P47912	fatty-acid--CoA ligase (octadecanoate), ER membrane (reversible) (No1)	1261.5	915.12	322463
	P30624	fatty-acid--CoA ligase (octadecanoate), ER membrane (reversible) (No2)	1261.5	915.12	322463
	P47912	fatty-acid--CoA ligase (octadecenoate), ER membrane (reversible) (No1)	1261.5	915.12	322463
	P30624	fatty-acid--CoA ligase (octadecenoate), ER membrane (reversible) (No2)	1261.5	915.12	322463
	P30624	fatty-acid--CoA ligase (dodecanoate), lipid particle (reversible) (No1)	1261.5	915.12	322463
	P47912	fatty-acid--CoA ligase (tetradecanoate), lipid particle (reversible) (No1)	1261.5	915.12	322463
	P30624	fatty-acid--CoA ligase (tetradecanoate), lipid particle (reversible) (No2)	1261.5	915.12	322463
	P47912	fatty-acid--CoA ligase (hexadecanoate), lipid particle (reversible) (No1)	1261.5	915.12	322463
	P30624	fatty-acid--CoA ligase (hexadecanoate), lipid particle (reversible) (No2)	1261.5	915.12	322463
	P47912	fatty-acid--CoA ligase (hexadecenoate), lipid particle (reversible) (No1)	1261.5	915.12	322463
	P30624	fatty-acid--CoA ligase (hexadecenoate), lipid particle (reversible) (No2)	1261.5	915.12	322463
	P47912	fatty-acid--CoA ligase (octadecanoate), lipid particle (reversible) (No1)	1261.5	915.12	322463
	P30624	fatty-acid--CoA ligase (octadecanoate), lipid particle (reversible) (No2)	1261.5	915.12	322463
	P47912	fatty-acid--CoA ligase (octadecenoate), lipid particle (reversible) (No1)	1261.5	915.12	322463
	P30624	fatty-acid--CoA ligase (octadecenoate), lipid particle (reversible) (No2)	1261.5	915.12	322463
	P39518	fatty-acid--CoA ligase (hexadecenoate), peroxisome (reversible) (No1)	1261.5	915.12	322463
	P39518	fatty-acid--CoA ligase (octadecanoate), peroxisome (reversible) (No1)	1261.5	915.12	322463
	P39518	fatty-acid--CoA ligase (octadecenoate), peroxisome (reversible) (No1)	1261.5	915.12	322463
	P39002	fatty-acid--CoA ligase (arachidate), cell envelope (reversible) (No1)	1261.5	915.12	322463
	P39002	fatty-acid--CoA ligase (behenate), cell envelope (reversible) (No1)	1261.5	915.12	322463
	P39002	fatty-acid--CoA ligase (lignoceric acid), cell envelope (reversible) (No1)	1261.5	915.12	322463
	P39002	fatty-acid--CoA ligase (cerotic acid), cell envelope (reversible) (No1)	1261.5	915.12	322463
	P38221	CDP-diacylglycerol synthase (1-16:0, 2-16:1), ER membrane (reversible) (No1)	32112	39.24	1.25871e+06
	P38221	CDP-diacylglycerol synthase (1-16:1, 2-16:1), ER membrane (reversible) (No1)	32112	39.24	1.25871e+06
	P38221	CDP-diacylglycerol synthase (1-18:0, 2-16:1), ER membrane (reversible) (No1)	32112	39.24	1.25871e+06
	P38221	CDP-diacylglycerol synthase (1-18:1, 2-16:1), ER membrane (reversible) (No1)	32112	39.24	1.25871e+06
	P38221	CDP-diacylglycerol synthase (1-16:0, 2-18:1), ER membrane (reversible) (No1)	32112	8.28	414383
	P38221	CDP-diacylglycerol synthase (1-16:1, 2-18:1), ER membrane (reversible) (No1)	32112	39.24	1.25871e+06
	P38221	CDP-diacylglycerol synthase (1-18:0, 2-18:1), ER membrane (reversible) (No1)	32112	39.24	1.25871e+06
	P38221	CDP-diacylglycerol synthase (1-18:1, 2-18:1), ER membrane (reversible) (No1)	32112	39.24	1.25871e+06
	P38221	CDP-diacylglycerol synthase (1-16:0, 2-16:1), mitochondrial membrane (reversible) (No1)	32112	39.24	1.25871e+06
	P38221	CDP-diacylglycerol synthase (1-16:1, 2-16:1), mitochondrial membrane (reversible) (No1)	32112	39.24	1.25871e+06
	P38221	CDP-diacylglycerol synthase (1-18:0, 2-16:1), mitochondrial membrane (reversible) (No1)	32112	39.24	1.25871e+06
	P38221	CDP-diacylglycerol synthase (1-18:1, 2-16:1), mitochondrial membrane (reversible) (No1)	32112	39.24	1.25871e+06
	P38221	CDP-diacylglycerol synthase (1-16:0, 2-18:1), mitochondrial membrane (reversible) (No1)	32112	8.28	414383
	P38221	CDP-diacylglycerol synthase (1-16:1, 2-18:1), mitochondrial membrane (reversible) (No1)	32112	39.24	1.25871e+06
	P32316	succinyl-CoA:acetate CoA transferase (reversible) (No1)	26136.3	3527.64	502904
	P53615	bicarbonate formation (reversible) (No1)	3.38398e+09	30.6	1.57587e+09
	Q12055	deoxyadenylate kinase (reversible) (No1)	2.81881e+06	60.12	2.71798e+06
	P06182	Cytochrome c apocytochrome-c-lyase (reversible) (No1)	2.41202e+07	1717.92	2.51494e+07
	Q00873	Cytochrome c apocytochrome-c-lyase (reversible) (No2)	2.41202e+07	1717.92	2.51494e+07
	P39713	(R)-Acetoin:NAD+ oxidoreductase (reversible) (No1)	65159.3	800.64	1.49468e+06
	P39713	Probable diacetyl reductase [(R)-acetoin forming] 2 (EC 1.1.1.303) (reversible) (No1)	65159.3	800.64	1.49468e+06
	P38218	ADP-ribose 1''-phosphate phosphatase (EC 3.1.3.84) (EC 3.2.2.-) ([Protein ADP-ribosylglutamate] hydrolase) (reversible) (No1)	84238.9	45	1.89906e+06
	Q04299	ADP-ribose 1''-phosphate phosphatase (EC 3.1.3.84) (EC 3.2.2.-) ([Protein ADP-ribosylglutamate] hydrolase) (reversible) (No2)	100.8	45	1.89906e+06
	P38230	NADPH2:quinone oxidoreductase (reversible) (No1)	15012.1	292.32	978650
	P53178	UDP-N-acetylglucosamine transferase subunit ALG14 (Asparagine-linked glycosylation protein 14) (reversible) (No1)	5399.86	21.6	2.26386e+06
	P38137	oxalate:CoA ligase (AMP-forming) (reversible) (No1)	284398	1388.52	225234
	P07286	UDP-N-acetyl-D-glucosamine:dolichyl-phosphate N-acetyl-D-glucosamine phosphotransferase (reversible) (No1)	1631.99	64.08	328583
	P25612	Putative aryl-alcohol dehydrogenase AAD3 (EC 1.1.1.-) (reversible) (No1)	65159.3	71.64	1.52942e+06
	Q07747	Putative aryl-alcohol dehydrogenase AAD3 (EC 1.1.1.-) (reversible) (No2)	65159.3	71.64	1.52942e+06
	P47182	Putative aryl-alcohol dehydrogenase AAD3 (EC 1.1.1.-) (reversible) (No3)	65159.3	71.64	1.52942e+06
	P42884	Putative aryl-alcohol dehydrogenase AAD3 (EC 1.1.1.-) (reversible) (No4)	65159.3	71.64	1.52942e+06
	Q08361	Putative aryl-alcohol dehydrogenase AAD3 (EC 1.1.1.-) (reversible) (No5)	65159.3	71.64	1.52942e+06
	Q02895	Putative aryl-alcohol dehydrogenase AAD3 (EC 1.1.1.-) (reversible) (No6)	65159.3	71.64	1.52942e+06
	P25612	Putative aryl-alcohol dehydrogenase AAD3 (EC 1.1.1.-) (reversible) (No1)	65159.3	71.64	1.52942e+06
	Q07747	Putative aryl-alcohol dehydrogenase AAD3 (EC 1.1.1.-) (reversible) (No2)	65159.3	71.64	1.52942e+06
	P47182	Putative aryl-alcohol dehydrogenase AAD3 (EC 1.1.1.-) (reversible) (No3)	65159.3	71.64	1.52942e+06
	P42884	Putative aryl-alcohol dehydrogenase AAD3 (EC 1.1.1.-) (reversible) (No4)	65159.3	71.64	1.52942e+06
	Q08361	Putative aryl-alcohol dehydrogenase AAD3 (EC 1.1.1.-) (reversible) (No5)	65159.3	71.64	1.52942e+06
	Q02895	Putative aryl-alcohol dehydrogenase AAD3 (EC 1.1.1.-) (reversible) (No6)	65159.3	71.64	1.52942e+06
	P25612	Putative aryl-alcohol dehydrogenase AAD3 (EC 1.1.1.-) (reversible) (No1)	65159.3	56.88	488717
	Q07747	Putative aryl-alcohol dehydrogenase AAD3 (EC 1.1.1.-) (reversible) (No2)	65159.3	56.88	488717
	P47182	Putative aryl-alcohol dehydrogenase AAD3 (EC 1.1.1.-) (reversible) (No3)	65159.3	56.88	488717
	P42884	Putative aryl-alcohol dehydrogenase AAD3 (EC 1.1.1.-) (reversible) (No4)	65159.3	56.88	488717
	Q08361	Putative aryl-alcohol dehydrogenase AAD3 (EC 1.1.1.-) (reversible) (No5)	65159.3	56.88	488717
	Q02895	Putative aryl-alcohol dehydrogenase AAD3 (EC 1.1.1.-) (reversible) (No6)	65159.3	56.88	488717
	P25612	Putative aryl-alcohol dehydrogenase AAD3 (EC 1.1.1.-) (reversible) (No1)	65159.3	71.64	1.52942e+06
	Q07747	Putative aryl-alcohol dehydrogenase AAD3 (EC 1.1.1.-) (reversible) (No2)	65159.3	71.64	1.52942e+06
	P47182	Putative aryl-alcohol dehydrogenase AAD3 (EC 1.1.1.-) (reversible) (No3)	65159.3	71.64	1.52942e+06
	P42884	Putative aryl-alcohol dehydrogenase AAD3 (EC 1.1.1.-) (reversible) (No4)	65159.3	71.64	1.52942e+06
	Q08361	Putative aryl-alcohol dehydrogenase AAD3 (EC 1.1.1.-) (reversible) (No5)	65159.3	71.64	1.52942e+06
	Q02895	Putative aryl-alcohol dehydrogenase AAD3 (EC 1.1.1.-) (reversible) (No6)	65159.3	71.64	1.52942e+06
	P25612	Putative aryl-alcohol dehydrogenase AAD3 (EC 1.1.1.-) (reversible) (No1)	65159.3	56.88	488717
	Q07747	Putative aryl-alcohol dehydrogenase AAD3 (EC 1.1.1.-) (reversible) (No2)	65159.3	56.88	488717
	P47182	Putative aryl-alcohol dehydrogenase AAD3 (EC 1.1.1.-) (reversible) (No3)	65159.3	56.88	488717
	P42884	Putative aryl-alcohol dehydrogenase AAD3 (EC 1.1.1.-) (reversible) (No4)	65159.3	56.88	488717
	Q08361	Putative aryl-alcohol dehydrogenase AAD3 (EC 1.1.1.-) (reversible) (No5)	65159.3	56.88	488717
	Q02895	Putative aryl-alcohol dehydrogenase AAD3 (EC 1.1.1.-) (reversible) (No6)	65159.3	56.88	488717
	P25612	Benzyl alcohol:NAD+ oxidoreductase (reversible) (No1)	195840	71.64	1.52942e+06
	Q07747	Benzyl alcohol:NAD+ oxidoreductase (reversible) (No2)	195840	71.64	1.52942e+06
	P47182	Benzyl alcohol:NAD+ oxidoreductase (reversible) (No3)	195840	71.64	1.52942e+06
	P42884	Benzyl alcohol:NAD+ oxidoreductase (reversible) (No4)	195840	71.64	1.52942e+06
	Q08361	Benzyl alcohol:NAD+ oxidoreductase (reversible) (No5)	195840	71.64	1.52942e+06
	Q02895	Benzyl alcohol:NAD+ oxidoreductase (reversible) (No6)	195840	71.64	1.52942e+06
	P39986	Manganese-transporting ATPase 1 (EC 3.6.3.-) (reversible) (No1)	71999.4	154.8	562011
	P0CX08	D-Mannitol:NAD+ 2-oxidoreductase (reversible) (No1)	3.31203e+06	1890	767510
	P0CX09	D-Mannitol:NAD+ 2-oxidoreductase (reversible) (No2)	3.31203e+06	1890	767510
	P40011	4-hydroxy-4-methyl-2-oxoglutarate pyruvate-lyase (pyruvate-forming) (reversible) (No1)	99.3641	64.8	2.07322e+06
	P40029	L-methionine:thioredoxin-disulfide S-oxidoreductase (reversible) (No1)	64499.5	848.52	5010498
	P38818	Cytochrome c lysine N-methyltransferase 1 (EC 2.1.1.59) (reversible) (No1)	0.680921	160.56	172548
	P38827	S-Adenosyl-L-methionine:histone-L-lysine N6-methyltransferase (reversible) (No1)	136.801	950.76	78715.1
	Q04089	S-Adenosyl-L-methionine:histone-L-lysine N6-methyltransferase (reversible) (No2)	136.801	311.4	216766
	P46995	S-Adenosyl-L-methionine:histone-L-lysine N6-methyltransferase (reversible) (No3)	136.801	308.16	89555.4
	P38626	NADH:ferricytochrome-b5 oxidoreductase (reversible) (No1)	1.08e+06	371.16	332117
	Q12746	NADH:ferricytochrome-b5 oxidoreductase (reversible) (No2)	1.08e+06	371.16	332117
	P38626	NADH-cytochrome b5 reductase 1 (EC 1.6.2.2) (Microsomal cytochrome b reductase) (P35) (reversible) (No1)	1.08e+06	371.16	332117
	P36060	NADH-cytochrome b5 reductase 1 (EC 1.6.2.2) (Microsomal cytochrome b reductase) (P35) (reversible) (No2)	1.08e+06	371.16	332117
	Q12746	NADH-cytochrome b5 reductase 1 (EC 1.6.2.2) (Microsomal cytochrome b reductase) (P35) (reversible) (No3)	1.08e+06	371.16	332117
	P40580	Benzil reductase ((S)-benzoin forming) IRC24 (EC 1.1.1.320) (Increased recombination centers protein 24) (reversible) (No1)	3851.93	54.36	864995
	P36088	L-methionine:oxidized-thioredoxin S-oxidoreductase (reversible) (No1)	50400.7	69.12	8.86337e+06
	P14904	Vacuolar aminopeptidase 1 (EC 3.4.11.22) (Aminopeptidase yscI) (Leucine aminopeptidase IV) (LAPIV) (Lysosomal aminopeptidase III) (Polypeptidase) (Vacuolar aminopeptidase I) (reversible) (No1)	1.1988e+08	2239.92	5.97551e+07
	P14904	Vacuolar aminopeptidase 1 (EC 3.4.11.22) (Aminopeptidase yscI) (Leucine aminopeptidase IV) (LAPIV) (Lysosomal aminopeptidase III) (Polypeptidase) (Vacuolar aminopeptidase I) (reversible) (No1)	1.1988e+08	3001.32	2.37595e+07
	P36007	threo-3-hydroxy-L-aspartate ammonia-lyase (reversible) (No1)	84238.9	1363.32	288651
	P43544	D-ribose 5-phosphate,D-glyceraldehyde 3-phosphate pyridoxal 5-phosphate-lyase (glutamine-hydrolyzing) (reversible) (No1)	2.24962e+07	51.84	433035
	P53823	D-ribose 5-phosphate,D-glyceraldehyde 3-phosphate pyridoxal 5-phosphate-lyase (glutamine-hydrolyzing) (reversible) (No2)	2.24962e+07	51.84	433035
	P43545	D-ribulose 5-phosphate,D-glyceraldehyde 3-phosphate pyridoxal 5-phosphate-lyase (reversible) (No1)	457.206	51.84	433035
	P53824	D-ribulose 5-phosphate,D-glyceraldehyde 3-phosphate pyridoxal 5-phosphate-lyase (reversible) (No2)	457.206	51.84	433035
	P43616	L-cysteinylglycine dipeptidase (reversible) (No1)	1.1988e+08	347.76	6227.64
	P43616	Cys-Gly metallodipeptidase DUG1 (EC 3.4.13.-) (Deficient in utilization of glutathione protein 1) (GSH degradosomal complex subunit DUG1) (reversible) (No1)	1.1988e+08	347.76	6227.64
	P52290	riboflavin-5-phosphate phosphohydrolase (reversible) (No1)	3.34459e+06	153	924654
	Q07648	D-aminoacyl-tRNA deacylase (DTD) (EC 3.1.1.96) (D-tyrosyl-tRNA(Tyr) deacylase) (Gly-tRNA(Ala) deacylase) (EC 3.1.1.-) (reversible) (No1)	1.08e+06	16.56	12319.2
	Q07648	D-aminoacyl-tRNA deacylase (DTD) (EC 3.1.1.96) (D-tyrosyl-tRNA(Tyr) deacylase) (Gly-tRNA(Ala) deacylase) (EC 3.1.1.-) (reversible) (No1)	1.08e+06	12.6	842272
	P19881	4-nitrophenyl phosphate phosphohydrolase (reversible) (No1)	388802	51.84	610200
	Q07786	D-Iditol:NAD+ 2-oxidoreductase (reversible) (No1)	579609	71.64	1.52942e+06
	Q99288	Broad-range acid phosphatase DET1 (EC 3.1.3.-) (Decreased ergosterol transport protein 1) (reversible) (No1)	262798	393.48	1.29031e+07
	P52892	L-Alanine:2-oxoglutarate aminotransferase (reversible) (No1)	31104.2	1129.68	1.78399e+06
	P22580	Indole-3-acetamide amidohydrolase (reversible) (No1)	2.59774e+07	1027.08	1697040
	P22580	Probable amidase (EC 3.5.1.4) (reversible) (No1)	1.19988e+06	163.8	340085
	P22580	Acylamide aminohydrolase (reversible) (No1)	2.59774e+07	1027.08	1697040
	P32584	S-Adenosyl-L-methionine:protein-C-terminal-S-farnesyl-L-cysteine O-methyltransferase (reversible) (No1)	1630.79	50.4	957390
	P32363	Phosphatidylinositol N-acetylglucosaminyltransferase subunit GPI19 (GPI-GlcNAc transferase complex subunit GPI19) (GPI-GnT subunit GPI19) (EC 2.4.1.198) (reversible) (No1)	5399.86	24.84	393069
	P46961	Phosphatidylinositol N-acetylglucosaminyltransferase subunit GPI19 (GPI-GlcNAc transferase complex subunit GPI19) (GPI-GnT subunit GPI19) (EC 2.4.1.198) (reversible) (No1)	5399.86	24.84	393069
	P53306	Phosphatidylinositol N-acetylglucosaminyltransferase subunit GPI19 (GPI-GlcNAc transferase complex subunit GPI19) (GPI-GnT subunit GPI19) (EC 2.4.1.198) (reversible) (No1)	5399.86	24.84	393069
	P53961	Phosphatidylinositol N-acetylglucosaminyltransferase subunit GPI19 (GPI-GlcNAc transferase complex subunit GPI19) (GPI-GnT subunit GPI19) (EC 2.4.1.198) (reversible) (No1)	5399.86	24.84	393069
	Q04082	Phosphatidylinositol N-acetylglucosaminyltransferase subunit GPI19 (GPI-GlcNAc transferase complex subunit GPI19) (GPI-GnT subunit GPI19) (EC 2.4.1.198) (reversible) (No1)	5399.86	24.84	393069
	Q04432	(R)-lactate hydro-lyase (reversible) (No1)	4500.05	440.64	5.9712e+06
	Q04902	(R)-lactate hydro-lyase (reversible) (No2)	4500.05	440.64	5.9712e+06
	Q08914	(R)-lactate hydro-lyase (reversible) (No3)	4500.05	440.64	5.9712e+06
	Q08992	(R)-lactate hydro-lyase (reversible) (No4)	4500.05	440.64	5.9712e+06
	P31755	Initiation-specific alpha-1,6-mannosyltransferase (EC 2.4.1.232) (Outer chain elongation protein 1) (reversible) (No1)	6119.95	142.92	3.20752e+06
	P53095	D-serine ammonia-lyase (reversible) (No1)	61199.5	115.92	2.85676e+06
	P53206	O3-acetyl-L-serine:hydrogen-sulfide 2-amino-2-carboxyethyltransferase; O3-acetyl-L-serine acetate-lyase (adding hydrogen sulfide) (reversible) (No1)	302398	1189.44	5.74917e+06
	P53223	Dolichyl-diphosphate phosphohydrolase (reversible) (No1)	1.3788e+07	20.88	2.49696e+06
	P53230	CTP:phosphatidate cytidyltransferase (reversible) (No1)	32112	39.24	1.25871e+06
	P32318	Thiamine thiazole synthase (Thiazole biosynthetic enzyme) (reversible) (No1)	71.9994	28.44	166695
	P47016	Deaminated glutathione amidase (dGSH amidase) (EC 3.5.1.-) (Nitrilase homolog 1) (reversible) (No1)	579609	307.8	1.07018e+07
	P47016	Deaminated glutathione amidase (dGSH amidase) (EC 3.5.1.-) (Nitrilase homolog 1) (reversible) (No1)	579609	307.8	1.07018e+07
	P39533	citrate hydroxymutase (reversible) (No1)	3959.93	9598.68	638446
	P21375	succinate:NAD+ oxidoreductase (reversible) (No1)	2.36883e+06	144.36	1.68635e+06
	P47119	Inosine triphosphate pyrophosphatase (ITPase) (Inosine triphosphatase) (EC 3.6.1.9) (Hydroxylaminopurine sensitivity protein 1) (Non-canonical purine NTP pyrophosphatase) (Non-standard purine NTP pyrophosphatase) (Nucleoside-triphosphate diphosphatase) (Nucleoside-triphosphate pyrophosphatase) (NTPase) (reversible) (No1)	284398	15.48	1.7247e+06
	P47177	ethylnitronate:oxygen 2-oxidoreductase (nitrite-forming) (reversible) (No1)	2.30399e+07	5859	5859
	Q04533	O-Succinyl-L-homoserine succinate-lyase (deaminating; 2-oxobutanoate-forming) (reversible) (No2)	435597	220.68	972486
	Q12209	Fe(II):NADP+ oxidoreductase (reversible) (No1)	29663.9	1336.68	127322
	P36033	Fe(II):NADP+ oxidoreductase (reversible) (No2)	7199.94	88.56	450030
	P32791	Fe(II):NADP+ oxidoreductase (reversible) (No3)	7199.94	88.56	450030
	P53746	Fe(II):NADP+ oxidoreductase (reversible) (No4)	7199.94	88.56	450030
	Q12333	Fe(II):NADP+ oxidoreductase (reversible) (No5)	7199.94	88.56	450030
	Q08905	Fe(II):NADP+ oxidoreductase (reversible) (No6)	7199.94	88.56	450030
	Q08908	Fe(II):NADP+ oxidoreductase (reversible) (No7)	7199.94	88.56	450030
	Q12473	Fe(II):NADP+ oxidoreductase (reversible) (No1)	7199.94	88.56	450030
	Q12524	8-oxo-dGTP diphosphohydrolase (reversible) (No1)	9180.21	9	377508
	Q03161	alpha-D-Glucose 6-phosphate ketol-isomerase (reversible) (No1)	1.6056e+06	3185.64	8.19208e+06
	Q04458	D-Glyceraldehyde:NAD+ oxidoreductase (reversible) (No1)	864006	1278.36	918234
	Q04458	2-Propyn-1-al:NAD+ oxidoreductase (reversible) (No1)	864006	1278.36	918234
	Q04458	D-Glucuronolactone:NAD+ oxidoreductase (reversible) (No1)	864006	1278.36	918234
	Q04458	4-Trimethylammoniobutanal:NAD+ 1-oxidoreductase; 4-Trimethylammoniobutanal:NAD+ oxidoreductase (reversible) (No1)	864006	1278.36	918234
	Q04458	(S)-Methylmalonate semialdehyde:NAD+ oxidoreductase (reversible) (No1)	864006	1278.36	918234
	Q04458	Imidazole acetaldehyde:NAD+ oxidoreductase (reversible) (No1)	864006	1278.36	918234
	Q04458	3alpha,7alpha-Dihydroxy-5beta-cholestan-26-al:NAD+ oxidoreductase (reversible) (No1)	864006	1278.36	918234
	Q04458	5-Hydroxyindoleacetaldehyde:NAD+ oxidoreductase (reversible) (No1)	864006	1278.36	918234
	Q04458	N4-Acetylaminobutanal:NAD+ oxidoreductase (reversible) (No1)	864006	1278.36	918234
	Q04458	Chloroacetaldehyde:NAD+ oxidoreductase (reversible) (No1)	864006	1278.36	918234
	Q04458	Aldehyde:NAD+ oxidoreductase (reversible) (No1)	864006	1278.36	918234
	Q04458	farnesal:NAD+ oxidoreductase (reversible) (No1)	864006	1278.36	918234
	P53954	GDP-mannose:glycolipid 1,2-alpha-D-mannosyltransferase (reversible) (No1)	3059.98	426.24	245851
	P53954	GDP-mannose:glycolipid 1,2-alpha-D-mannosyltransferase (reversible) (No1)	3059.98	426.24	245851
	P53934	S-adenosyl-L-methionine:carnosine N-methyltransferase (reversible) (No1)	280.796	170.28	331970
	P32875	protein N6-(octanoyl)lysine:sulfur sulfurtransferase (reversible) (No1)	493559	386.64	480580
	P32875	octanoyl-[acp]:sulfur sulfurtransferase (reversible) (No1)	493559	386.64	480580
	P40350	UDPglucose:dolichyl-phosphate beta-D-glucosyltransferase (reversible) (No1)	5399.86	48.24	738709
	Q06494	Pyridoxine:NADP+ 4-oxidoreductase (reversible) (No1)	422994	23.4	854213
	P38698	Polyphosphate phosphohydrolase (reversible) (No1)	5.58005e+06	23.76	599529
	Q04119	Polyphosphate phosphohydrolase (reversible) (No2)	1.3788e+07	150.48	1.27728e+06
	Q12675	O-Phosphoryl-Ethanolamine transport in via proton symport (reversible) (No1)	459010	1104.12	99026.6
	P47164	O4-succinyl-L-homoserine:hydrogen sulfide S-(3-amino-3-carboxypropyl)transferase; O-succinyl-L-homoserine succinate-lyase (adding hydrogen sulfide) (reversible) (No1)	435597	513.36	269653
	Q04533	O4-succinyl-L-homoserine:hydrogen sulfide S-(3-amino-3-carboxypropyl)transferase; O-succinyl-L-homoserine succinate-lyase (adding hydrogen sulfide) (reversible) (No3)	435597	513.36	269653

## Sheet: Table S8.
Table S8. Number of enzymes taken from each organism for amino acid modifications .
	S. cerevisiae				E. coli
	Organism	Number of enzymes			Organism	Number of enzymes
	yHMPu5000041818_Magnusiomyces_tetrasperma	14			Saccharomyces_paradoxus	11
	Coccidioides_immitis	17			Spathaspora_girioi	22
	yHMPu5000035696_Hanseniaspora_singularis	13			Candida_tropicalis	17
	yHMPu5000026145_Ambrosiozyma_vanderkliftii	14			yHMPu5000041713_Debaryomyces_maramus	8
	yHMPu5000034607_Saccharomycopsis_capsularis	14			yHAB133_Kazachstania_unispora	29
	yHMPu5000035690_Candida_vartiovaarae	14			yHMPu5000035244_Candida_incommunis	8
	yHMPu5000034742_Lipomyces_suomiensis	14			Metschnikowia_bicuspidata	11
	yHMPu5000034671_Blastobotrys_peoriensis	21			yHMPu5000034646_Wickerhamiella_cacticola	11
	Tetrapisispora_phaffii	13			yHMPu5000035640_Yamadazyma_philogaea	9
	Candida_dubliniensis	14			Neurospora_crassa	9
	yHMPu5000034710_Kluyveromyces_dobzhanskii	16			yHMPu5000034974_Deakozyma_indianensis	11
	Spathaspora_gorwiae	14			yHMPu5000034624_Pichia_nakasei	10
	yHMPu5000034681_Blastobotrys_americana	14			Candida_apicola	11
	Saccharomyces_cerevisiae	22			Metschnikowia_kipukae	15
	yHAB134_Kazachstania_turicensis	10			Ascoidea_asiatica	10
	Cyberlindnera_fabianii_JCM3601	17			Lachancea_fantastica	11
	yHMPu5000035335_Candida_blattae	11			Metschnikowia_bowlesiae	9
	Sclerotinia_sclerotiorum	14			yHMPu5000026137_Ambrosiozyma_ambrosiae	9
	Priceomyces_haplophilus	9			Lachancea_waltii	9
	Saccharomyces_paradoxus	7			yHMPu5000034891_Ogataea_pini	11
	Candida_apicola	13			yHMPu5000035672_Phaffomyces_thermotolerans	11
	yHMPu5000034918_Nakazawaea_holstii	11			yHMPu5000034597_Candida_stellimalicola	13
	Vanderwaltozyma_polyspora	14			yHMPu5000034877_Tetrapisispora_namnaonensis	11
	yHMPu5000035274_Wickerhamomyces_alni	12			yHMPu5000034615_Saturnispora_zaruensis	10
	yHMPu5000034631_Martiniozyma_abiesophila	9			Vanderwaltozyma_polyspora	11
	yHMPu5000041713_Debaryomyces_maramus	8			yHMPu5000034885_Ogataea_zsoltii	1
	Saitoella_complicata	32			Lachancea_cidri	3
	yHMPu5000034877_Tetrapisispora_namnaonensis	13			yHMPu5000026142_Citeromyces_matritensis	3
	yHMPu5000034883_Peterozyma_xylosa	27			yHMPu5000035707_Candida_heveicola	2
	yHMPu5000035031_Candida_kruisii	14			yHMPu5000035691_Candida_salmanticensis	1
	yHAB133_Kazachstania_unispora	31			yHMPu5000035690_Candida_vartiovaarae	11
	yHMPu5000034887_Ogataea_trehaloabstinens	20			yHMPu5000035301_Pichia_terricola	3
	yHMPu5000034623_Pichia_norvegensis	13			yHMPu5000034635_Nadsonia_fulvescens	2
	yHMPu5000035279_Tortispora_starmeri	15			Candida_intermedia	1
	yHMPu5000035261_Candida_ponderosae	13			Lachancea_quebecensis	1
	yHMPu5000035703_Cyberlindnera_americana	4			yHMPu5000034623_Pichia_norvegensis	1
	yHMPu5000034597_Candida_stellimalicola	11			Naumovozyma_dairenensis	3
	yHMPu5000026142_Citeromyces_matritensis	13			yHMPu5000035695_Hanseniaspora_pseudoguilliermondii	4
	yHAB160_Kazachstania_kunashirensis	8			Cyberlindnera_fabianii_JCM3601	3
	yHMPu5000035022_Candida_emberorum	13			yHMPu5000034606_Priceomyces_medius	1
	Sugiyamaella_lignohabitans	50			Metschnikowia_proteae	2
	yHMPu5000034646_Wickerhamiella_cacticola	13			Lodderomyces_elongisporus	2
	yHAB155_Kazachstania_spencerorum	1			yHMPu5000041678_Debaryomyces_prosopidis	1
	Metschnikowia_lockheadii	2			yHMPu5000034933_Kuraishia_molischiana	2
	Ascoidea_asiatica	4			yHMPu5000034709_Kluyveromyces_aestuarii	1
	yHMPu5000034636_Ogataea_nitratoaversa	8			yHMPu5000034865_Zygosaccharomyces_kombuchaensis	2
	Candida_sojae	5			yHMPu5000035650_Trigonopsis_variabilis	1
	yHMPu5000034952_Citeromyces_siamensis	5			yHMPu5000035252_Yamadazyma_nakazawae	1
	yHMPu5000034674_Blastobotrys_muscicola	6			yHMPu5000034594_Starmera_quercuum	1
	Lodderomyces_elongisporus	5			Metschnikowia_hamakuensis	1
	yHMPu5000035242_Zygoascus_ofunaensis	2			yHMPu5000034661_Dipodascus_albidus	1
	Lachancea_fantastica	2			yHMPu5000035654_Tortispora_ganteri	1
	Zygosaccharomyces_rouxii	3			yHMPu5000034681_Blastobotrys_americana	1
	Candida_parapsilosis	3
	yHMPu5000035695_Hanseniaspora_pseudoguilliermondii	1
	yHMPu5000026274_Komagataella_populi	1
	yHMPu5000035011_Candida_pyralidae	1
	Nakazawaea_peltata	3
	yHMPu5000034950_Citeromyces_hawaiiensis	5
	yHMPu5000034673_Blastobotrys_nivea	5
	Spathaspora_girioi	5
	yHAB159_Kazachstania_solicola	2
	Ascoidea_rubescens	4
	yHMPu5000035286_Candida_azyma	9
	yHMPu5000034655_Botryozyma_nematodophila	2
	Pachysolen_tannophilus	1
	Lachancea_kluyveri	4
	yHMPu5000034749_Lipomyces_mesembrius	3
	yHMPu5000035252_Yamadazyma_nakazawae	1
	Nakaseomyces_delphensis	4
	yHMPu5000034758_Lipomyces_japonicus	4
	yHMPu5000034890_Ogataea_ramenticola	3
	yHMPu5000026152_Torulaspora_franciscae	4
	Pichia_membranifaciens	5
	yHMPu5000034757_Lipomyces_doorenjongii	1
	Meyerozyma_guilliermondii	2
	yHMPu5000034892_Ogataea_pilisensis	1
	Lachancea_cidri	5
	yHMPu5000035045_Barnettozyma_hawaiiensis	8
	yHMPu5000035040_Ambrosiozyma_maleeae	2
	yHMPu5000034614_Saturnispora_silvae	4
	Cyberlindnera_jadinii	3
	Yarrowia_deformans	1
	Zygosaccharomyces_bailii	3
	Candida_auris	3
	yHMPu5000041678_Debaryomyces_prosopidis	3
	Ogataea_methanolica	2
	yHMPu5000041743_Candida_hawaiiana	1
	yHMPu5000034670_Blastobotrys_proliferans	3
	yHMPu5000035302_Candida_fragi	1
	Candida_versatilis	2
	yHMPu5000035650_Trigonopsis_variabilis	4
	Wickerhamia_fluorescens	1
	Yarrowia_keelungensis	2
	yHMPu5000034986_Candida_oregonensis	3
	Lachancea_mirantina	2
	Spathaspora_hagerdaliae	1
	yHMPu5000035046_Barnettozyma_populi	1
	Nakaseomyces_bracarensis	2
	yHMPu5000035691_Candida_salmanticensis	1
	yHMPu5000034903_Ogataea_naganishii	1
	yHMPu5000041862_Candida_golubevii	1
	yHMPu5000034606_Priceomyces_medius	1
